# Supplementary material
Source: PubMed Central journal article supplement (PMC3591666)
Supplement: supp_M112.024661_mcp.M112.024661-4.pdf [file supp_M112.024661_mcp.M112.024661-4.pdf]

# Mascot Search Results

## Peptide View

MS/MS Fragmentation of **YGDSGEQIAGFVK**

Found in **P10619|PPGB\_HUMAN**, Lysosomal protective protein OS=Homo sapiens GN=CTSA PE=1 SV=2

Match to Query 19656: 1369.609228 from(685.811890,2+)

Title: Locus:5.1.1.6609.3

Click mouse within plot area to zoom in by factor of two about that point

Or,  100  to 1300  Da

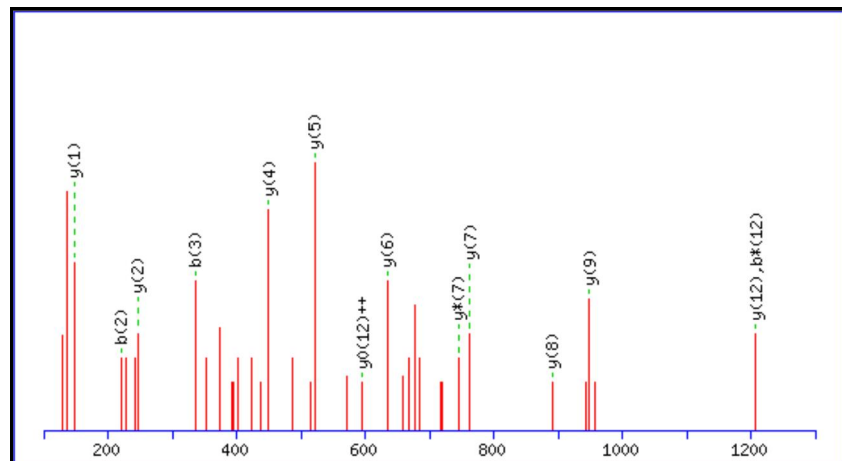

Monoisotopic mass of neutral peptide  $M_r(\text{calc})$ : 1369.6514

Fixed modifications: Carbamidomethyl (C)

Ions Score: 75 Expect: 6.3e-007

Matches (**Bold Red**): 14/114 fragment ions using 22 most intense peaks

| #  | b               | b <sup>++</sup> | b*               | b <sup>*++</sup> | b <sup>0</sup> | b <sup>0++</sup> | Seq. | y                | y <sup>++</sup> | y*              | y <sup>*++</sup> | y <sup>0</sup> | y <sup>0++</sup> | #  |
|----|-----------------|-----------------|------------------|------------------|----------------|------------------|------|------------------|-----------------|-----------------|------------------|----------------|------------------|----|
| 1  | 164.0706        | 82.5389         |                  |                  |                |                  | Y    |                  |                 |                 |                  |                |                  | 13 |
| 2  | <b>221.0921</b> | 111.0497        |                  |                  |                |                  | G    | <b>1207.5953</b> | 604.3013        | 1190.5688       | 595.7880         | 1189.5848      | <b>595.2960</b>  | 12 |
| 3  | <b>336.1190</b> | 168.5631        |                  |                  | 318.1084       | 159.5579         | D    | 1150.5739        | 575.7906        | 1133.5473       | 567.2773         | 1132.5633      | 566.7853         | 11 |
| 4  | 423.1510        | 212.0792        |                  |                  | 405.1405       | 203.0739         | S    | 1035.5469        | 518.2771        | 1018.5204       | 509.7638         | 1017.5364      | 509.2718         | 10 |
| 5  | 480.1725        | 240.5899        |                  |                  | 462.1619       | 231.5846         | G    | <b>948.5149</b>  | 474.7611        | 931.4884        | 466.2478         | 930.5043       | 465.7558         | 9  |
| 6  | 609.2151        | 305.1112        |                  |                  | 591.2045       | 296.1059         | E    | <b>891.4934</b>  | 446.2504        | 874.4669        | 437.7371         | 873.4829       | 437.2451         | 8  |
| 7  | 737.2737        | 369.1405        | 720.2471         | 360.6272         | 719.2631       | 360.1352         | Q    | <b>762.4509</b>  | 381.7291        | <b>745.4243</b> | 373.2158         |                |                  | 7  |
| 8  | 850.3577        | 425.6825        | 833.3312         | 417.1692         | 832.3472       | 416.6772         | I    | <b>634.3923</b>  | 317.6998        | 617.3657        | 309.1865         |                |                  | 6  |
| 9  | 921.3949        | 461.2011        | 904.3683         | 452.6878         | 903.3843       | 452.1958         | A    | <b>521.3082</b>  | 261.1577        | 504.2817        | 252.6445         |                |                  | 5  |
| 10 | 978.4163        | 489.7118        | 961.3898         | 481.1985         | 960.4058       | 480.7065         | G    | <b>450.2711</b>  | 225.6392        | 433.2445        | 217.1259         |                |                  | 4  |
| 11 | 1125.4847       | 563.2460        | 1108.4582        | 554.7327         | 1107.4742      | 554.2407         | F    | 393.2496         | 197.1285        | 376.2231        | 188.6152         |                |                  | 3  |
| 12 | 1224.5531       | 612.7802        | <b>1207.5266</b> | 604.2669         | 1206.5426      | 603.7749         | V    | <b>246.1812</b>  | 123.5942        | 229.1547        | 115.0810         |                |                  | 2  |
| 13 |                 |                 |                  |                  |                |                  | K    | <b>147.1128</b>  | 74.0600         | 130.0863        | 65.5468          |                |                  | 1  |

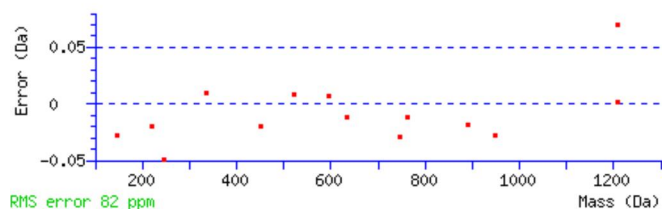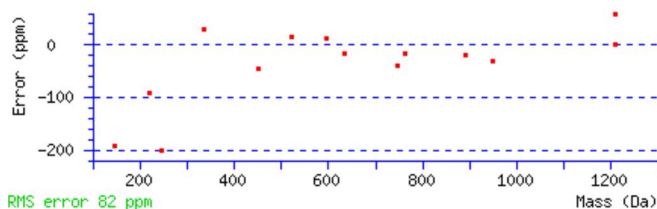

NCBI BLAST search of **YGDSGEQIAGFVK**

(Parameters: blastp, nr protein database, expect=20000, no filter, PAM30)

Other BLAST [web gateways](#)

All matches to this query

| Score | Mr(calc): | Delta   | Sequence                      |
|-------|-----------|---------|-------------------------------|
| 74.7  | 1369.6514 | -0.0422 | <a href="#">YGDSGEQIAGFVK</a> |

|     |           |         |                              |
|-----|-----------|---------|------------------------------|
| 4.8 | 1369.6183 | -0.0091 | <a href="#">YADSLNDANMLK</a> |
| 4.3 | 1369.6514 | -0.0422 | <a href="#">QFEDELHPDLK</a>  |
| 3.8 | 1369.6626 | -0.0534 | <a href="#">NFENTRESFVK</a>  |
| 3.7 | 1369.6588 | -0.0495 | <a href="#">YAVSIMWELDK</a>  |
| 1.4 | 1369.6734 | -0.0642 | <a href="#">GYLKCDISVMGK</a> |

**Mascot:** <http://www.matrixscience.com/>

# Mascot Search Results

## Peptide View

MS/MS Fragmentation of **TYQQSCVSSCR**

Found in **Q8IUC1|KRI11\_HUMAN**, Keratin-associated protein 11-1 OS=Homo sapiens GN=KRTAP11-1 PE=1 SV=1

Match to Query 7646: 1374.527288 from(688.270920,2+)

Title: Locus:9.1.1.6301.2

Click mouse within plot area to zoom in by factor of two about that point

Or,  100  to 1200  Da

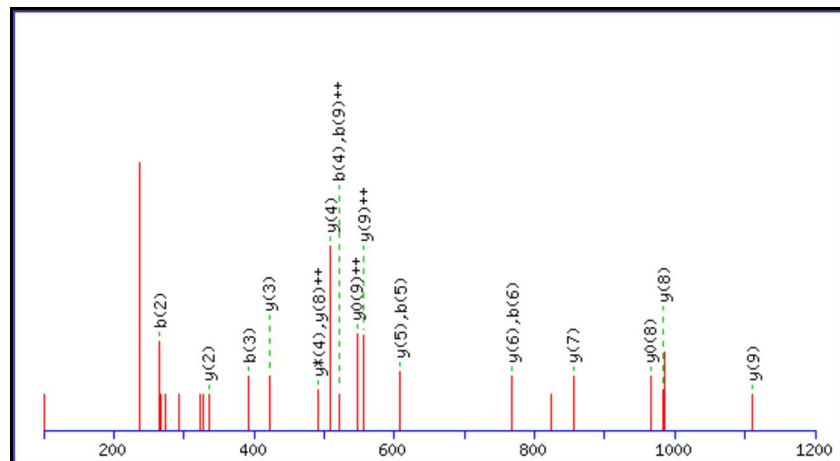

Monoisotopic mass of neutral peptide  $M_r(\text{calc})$ : 1374.5656

Fixed modifications: Carbamidomethyl (C)

Ions Score: 58 Expect: 1e-005

Matches (**Bold Red**): 19/112 fragment ions using 25 most intense peaks

| #  | b               | b <sup>++</sup> | b*        | b <sup>*++</sup> | b <sup>0</sup> | b <sup>0++</sup> | Seq. | y                | y <sup>++</sup> | y*              | y <sup>*++</sup> | y <sup>0</sup>  | y <sup>0++</sup> | #  |
|----|-----------------|-----------------|-----------|------------------|----------------|------------------|------|------------------|-----------------|-----------------|------------------|-----------------|------------------|----|
| 1  | 102.0550        | 51.5311         |           |                  | 84.0444        | 42.5258          | T    |                  |                 |                 |                  |                 |                  | 11 |
| 2  | <b>265.1183</b> | 133.0628        |           |                  | 247.1077       | 124.0575         | Y    | 1274.5252        | 637.7663        | 1257.4987       | 629.2530         | 1256.5147       | 628.7610         | 10 |
| 3  | <b>393.1769</b> | 197.0921        | 376.1503  | 188.5788         | 375.1663       | 188.0868         | Q    | <b>1111.4619</b> | <b>556.2346</b> | 1094.4354       | 547.7213         | 1093.4513       | <b>547.2293</b>  | 9  |
| 4  | <b>521.2354</b> | 261.1214        | 504.2089  | 252.6081         | 503.2249       | 252.1161         | Q    | <b>983.4033</b>  | <b>492.2053</b> | 966.3768        | 483.6920         | <b>965.3928</b> | 483.2000         | 8  |
| 5  | <b>608.2675</b> | 304.6374        | 591.2409  | 296.1241         | 590.2569       | 295.6321         | S    | <b>855.3447</b>  | 428.1760        | 838.3182        | 419.6627         | 837.3342        | 419.1707         | 7  |
| 6  | <b>768.2981</b> | 384.6527        | 751.2716  | 376.1394         | 750.2876       | 375.6474         | C    | <b>768.3127</b>  | 384.6600        | 751.2862        | 376.1467         | 750.3022        | 375.6547         | 6  |
| 7  | 867.3665        | 434.1869        | 850.3400  | 425.6736         | 849.3560       | 425.1816         | V    | <b>608.2821</b>  | 304.6447        | 591.2555        | 296.1314         | 590.2715        | 295.6394         | 5  |
| 8  | 954.3986        | 477.7029        | 937.3720  | 469.1896         | 936.3880       | 468.6976         | S    | <b>509.2137</b>  | 255.1105        | <b>492.1871</b> | 246.5972         | 491.2031        | 246.1052         | 4  |
| 9  | 1041.4306       | <b>521.2189</b> | 1024.4040 | 512.7057         | 1023.4200      | 512.2136         | S    | <b>422.1816</b>  | 211.5945        | 405.1551        | 203.0812         | 404.1711        | 202.5892         | 3  |
| 10 | 1201.4612       | 601.2343        | 1184.4347 | 592.7210         | 1183.4507      | 592.2290         | C    | <b>335.1496</b>  | 168.0784        | 318.1231        | 159.5652         |                 |                  | 2  |
| 11 |                 |                 |           |                  |                |                  | R    | 175.1190         | 88.0631         | 158.0924        | 79.5498          |                 |                  | 1  |

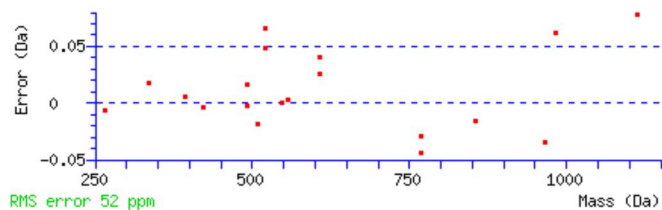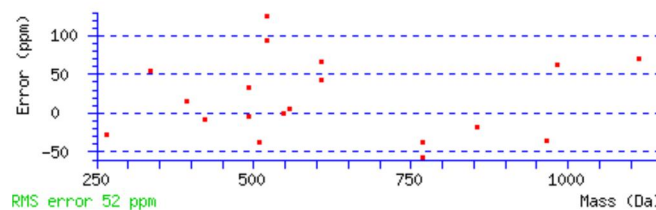

NCBI BLAST search of **TYQQSCVSSCR**

(Parameters: blastp, nr protein database, expect=20000, no filter, PAM30)

Other BLAST [web gateways](#)

All matches to this query

| Score | $M_r(\text{calc})$ : | Delta   | Sequence           |
|-------|----------------------|---------|--------------------|
| 58.0  | 1374.5656            | -0.0384 | <b>TYQQSCVSSCR</b> |

Mascot: <http://www.matrixscience.com/>

# MASCOT SCIENCE Mascot Search Results

## Peptide View

MS/MS Fragmentation of **LEALDANSR**

Found in **P09496|CLCA\_HUMAN**, Clathrin light chain A OS=Homo sapiens GN=CLTA PE=1 SV=1

Match to Query 13962: 987.467208 from(494.740880,2+)

Title: Locus:9.1.1.6618.2

Click mouse within plot area to zoom in by factor of two about that point

Or,  50  to 900  Da

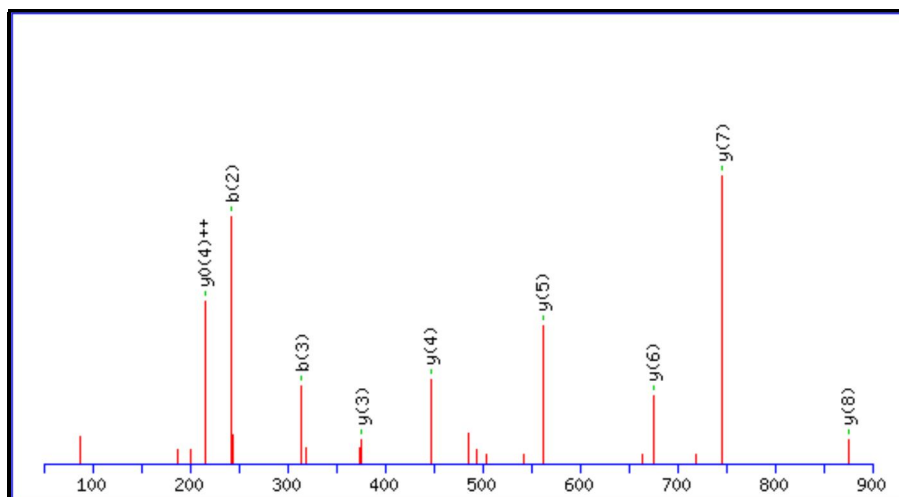

Monoisotopic mass of neutral peptide Mr(calc): 987.4985

Fixed modifications: Carbamidomethyl (C)

Ions Score: 53 Expect: 0.00015

Matches (**Bold Red**): 9/80 fragment ions using 15 most intense peaks

| # | b               | b <sup>++</sup> | b*       | b <sup>*++</sup> | b <sup>0</sup> | b <sup>0++</sup> | Seq. | y               | y <sup>++</sup> | y*       | y <sup>*++</sup> | y <sup>0</sup> | y <sup>0++</sup> | # |
|---|-----------------|-----------------|----------|------------------|----------------|------------------|------|-----------------|-----------------|----------|------------------|----------------|------------------|---|
| 1 | 114.0913        | 57.5493         |          |                  |                |                  | L    |                 |                 |          |                  |                |                  | 9 |
| 2 | <b>243.1339</b> | 122.0706        |          |                  | 225.1234       | 113.0653         | E    | <b>875.4217</b> | 438.2145        | 858.3952 | 429.7012         | 857.4112       | 429.2092         | 8 |
| 3 | <b>314.1710</b> | 157.5892        |          |                  | 296.1605       | 148.5839         | A    | <b>746.3791</b> | 373.6932        | 729.3526 | 365.1799         | 728.3686       | 364.6879         | 7 |
| 4 | 427.2551        | 214.1312        |          |                  | 409.2445       | 205.1259         | L    | <b>675.3420</b> | 338.1747        | 658.3155 | 329.6614         | 657.3315       | 329.1694         | 6 |
| 5 | 542.2821        | 271.6447        |          |                  | 524.2715       | 262.6394         | D    | <b>562.2580</b> | 281.6326        | 545.2314 | 273.1193         | 544.2474       | 272.6273         | 5 |
| 6 | 613.3192        | 307.1632        |          |                  | 595.3086       | 298.1579         | A    | <b>447.2310</b> | 224.1191        | 430.2045 | 215.6059         | 429.2205       | <b>215.1139</b>  | 4 |
| 7 | 727.3621        | 364.1847        | 710.3355 | 355.6714         | 709.3515       | 355.1794         | N    | <b>376.1939</b> | 188.6006        | 359.1674 | 180.0873         | 358.1833       | 179.5953         | 3 |
| 8 | 814.3941        | 407.7007        | 797.3676 | 399.1874         | 796.3836       | 398.6954         | S    | 262.1510        | 131.5791        | 245.1244 | 123.0659         | 244.1404       | 122.5738         | 2 |
| 9 |                 |                 |          |                  |                |                  | R    | 175.1190        | 88.0631         | 158.0924 | 79.5498          |                |                  | 1 |

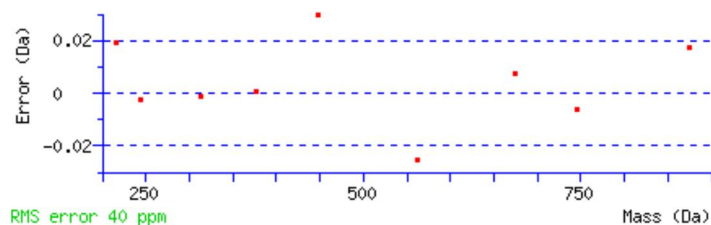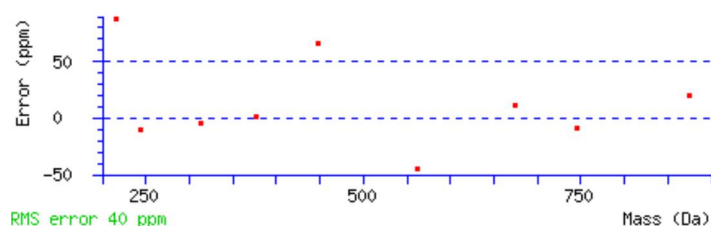

NCBI BLAST search of [LEALDANSR](#)

(Parameters: blastp, nr protein database, expect=20000, no filter, PAM30)

Other BLAST [web gateways](#)

**All matches to this query**

| Score | Mr(calc): | Delta   | Sequence                   |
|-------|-----------|---------|----------------------------|
| 52.7  | 987.4985  | -0.0313 | <a href="#">LEALDANSR</a>  |
| 19.2  | 987.4872  | -0.0200 | <a href="#">ELALEEER</a>   |
| 10.4  | 987.4846  | -0.0174 | <a href="#">NKNQGSGAGR</a> |
| 8.2   | 987.4985  | -0.0313 | <a href="#">IEDSAQVAR</a>  |
| 8.2   | 987.5059  | -0.0387 | <a href="#">LETPMELR</a>   |
| 5.0   | 987.4946  | -0.0274 | <a href="#">ELELMPEK</a>   |
| 5.0   | 987.4848  | -0.0176 | <a href="#">LAEHMFPK</a>   |
| 4.8   | 987.4621  | 0.0051  | <a href="#">TDEVPAGGSR</a> |
| 4.0   | 987.4509  | 0.0163  | <a href="#">ELSPEEER</a>   |
| 3.2   | 987.5025  | -0.0353 | <a href="#">LEYEGLHK</a>   |

**Mascot:** <http://www.matrixscience.com/>

# Mascot Search Results

## Peptide View

MS/MS Fragmentation of **AVVFLEPQWYR**

Found in **P08637|FCG3A\_HUMAN**, Low affinity immunoglobulin gamma Fc region receptor III-A OS=Homo sapiens GN=FCGR3A PE=1 SV=2

Match to Query 23608: 1406.694348 from(704.354450,2+)

Title: Locus:6.1.1.6080.2

Click mouse within plot area to zoom in by factor of two about that point

Or,  to  Da

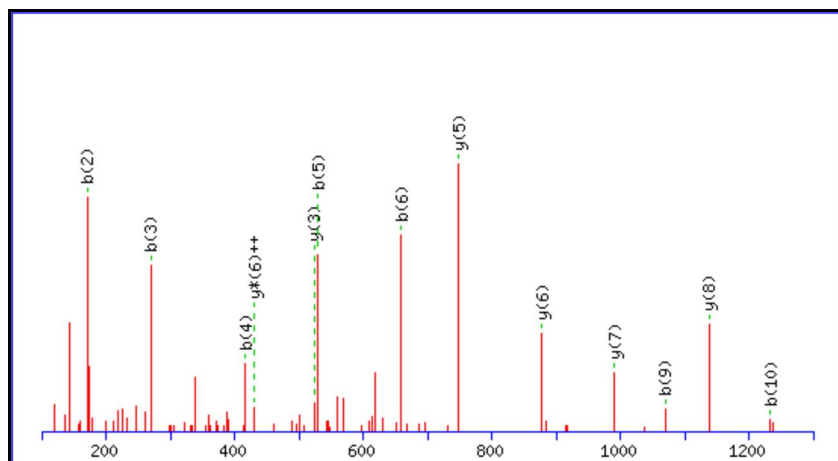

Monoisotopic mass of neutral peptide  $M_r(\text{calc})$ : 1406.7347

Fixed modifications: Carbamidomethyl (C)

Ions Score: 73 Expect: 1.4e-006

Matches (**Bold Red**): 13/86 fragment ions using 13 most intense peaks

| #  | b                | b <sup>++</sup> | b*        | b <sup>*++</sup> | b <sup>0</sup> | b <sup>0++</sup> | Seq.     | y                | y <sup>++</sup> | y*        | y <sup>*++</sup> | y <sup>0</sup> | y <sup>0++</sup> | #         |
|----|------------------|-----------------|-----------|------------------|----------------|------------------|----------|------------------|-----------------|-----------|------------------|----------------|------------------|-----------|
| 1  | 72.0444          | 36.5258         |           |                  |                |                  | <b>A</b> |                  |                 |           |                  |                |                  | <b>11</b> |
| 2  | <b>171.1128</b>  | 86.0600         |           |                  |                |                  | <b>V</b> | 1336.7048        | 668.8561        | 1319.6783 | 660.3428         | 1318.6943      | 659.8508         | <b>10</b> |
| 3  | <b>270.1812</b>  | 135.5942        |           |                  |                |                  | <b>V</b> | 1237.6364        | 619.3218        | 1220.6099 | 610.8086         | 1219.6259      | 610.3166         | <b>9</b>  |
| 4  | <b>417.2496</b>  | 209.1285        |           |                  |                |                  | <b>F</b> | <b>1138.5680</b> | 569.7876        | 1121.5415 | 561.2744         | 1120.5574      | 560.7824         | <b>8</b>  |
| 5  | <b>530.3337</b>  | 265.6705        |           |                  |                |                  | <b>L</b> | <b>991.4996</b>  | 496.2534        | 974.4730  | 487.7402         | 973.4890       | 487.2482         | <b>7</b>  |
| 6  | <b>659.3763</b>  | 330.1918        |           |                  | 641.3657       | 321.1865         | <b>E</b> | <b>878.4155</b>  | 439.7114        | 861.3890  | <b>431.1981</b>  | 860.4050       | 430.7061         | <b>6</b>  |
| 7  | 756.4291         | 378.7182        |           |                  | 738.4185       | 369.7129         | <b>P</b> | <b>749.3729</b>  | 375.1901        | 732.3464  | 366.6768         |                |                  | <b>5</b>  |
| 8  | 884.4876         | 442.7475        | 867.4611  | 434.2342         | 866.4771       | 433.7422         | <b>Q</b> | 652.3202         | 326.6637        | 635.2936  | 318.1504         |                |                  | <b>4</b>  |
| 9  | <b>1070.5669</b> | 535.7871        | 1053.5404 | 527.2738         | 1052.5564      | 526.7818         | <b>W</b> | <b>524.2616</b>  | 262.6344        | 507.2350  | 254.1212         |                |                  | <b>3</b>  |
| 10 | <b>1233.6303</b> | 617.3188        | 1216.6037 | 608.8055         | 1215.6197      | 608.3135         | <b>Y</b> | 338.1823         | 169.5948        | 321.1557  | 161.0815         |                |                  | <b>2</b>  |
| 11 |                  |                 |           |                  |                |                  | <b>R</b> | 175.1190         | 88.0631         | 158.0924  | 79.5498          |                |                  | <b>1</b>  |

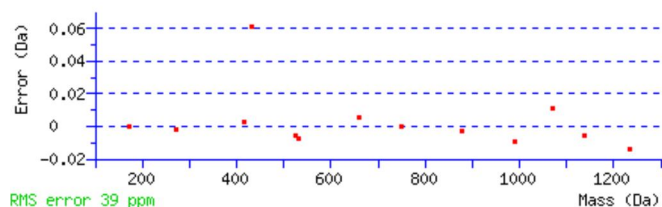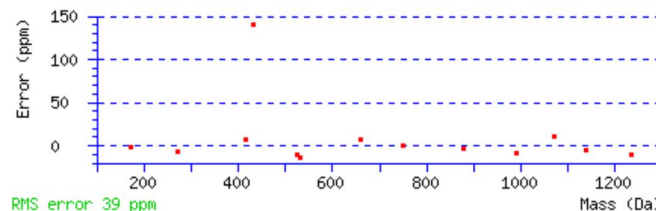

NCBI BLAST search of [AVVFLEPQWYR](#)

(Parameters: blastp, nr protein database, expect=20000, no filter, PAM30)

Other BLAST [web gateways](#)

### All matches to this query

| Score | $M_r(\text{calc})$ | Delta   | Sequence                       |
|-------|--------------------|---------|--------------------------------|
| 73.4  | 1406.7347          | -0.0403 | <a href="#">AVVFLEPQWYR</a>    |
| 19.3  | 1406.7379          | -0.0435 | <a href="#">GLVGPPGSRGNPGR</a> |

|      |           |         |                                |
|------|-----------|---------|--------------------------------|
| 13.2 | 1406.6897 | 0.0046  | <a href="#">MLNDQLMLLER</a>    |
| 12.9 | 1406.7194 | -0.0250 | <a href="#">YPLYSVNEAPYR</a>   |
| 11.6 | 1406.6684 | 0.0259  | <a href="#">SNRATAATAMNQR</a>  |
| 7.2  | 1406.6976 | -0.0033 | <a href="#">LGFVDVQNCISR</a>   |
| 6.3  | 1406.7261 | -0.0318 | <a href="#">MLEGDLVSKMLR</a>   |
| 6.0  | 1406.6547 | 0.0396  | <a href="#">VAMAMGSHPRYR</a>   |
| 5.5  | 1406.6579 | 0.0365  | <a href="#">GGGGDWPAGLTTYR</a> |
| 5.0  | 1406.7228 | -0.0284 | <a href="#">AVSCTPLYVEIR</a>   |

**Mascot:** <http://www.matrixscience.com/>

# Mascot Search Results

## Peptide View

MS/MS Fragmentation of **NIEDVIAQGIGK**

Found in **P05387|RLA2\_HUMAN**, 60S acidic ribosomal protein P2 OS=Homo sapiens GN=RPLP2 PE=1 SV=1

Match to Query 21010: 1255.652988 from(628.833770,2+)

Title: Locus:12.1.1.6455.3

Click mouse within plot area to zoom in by factor of two about that point

Or,  100  to 1200  Da

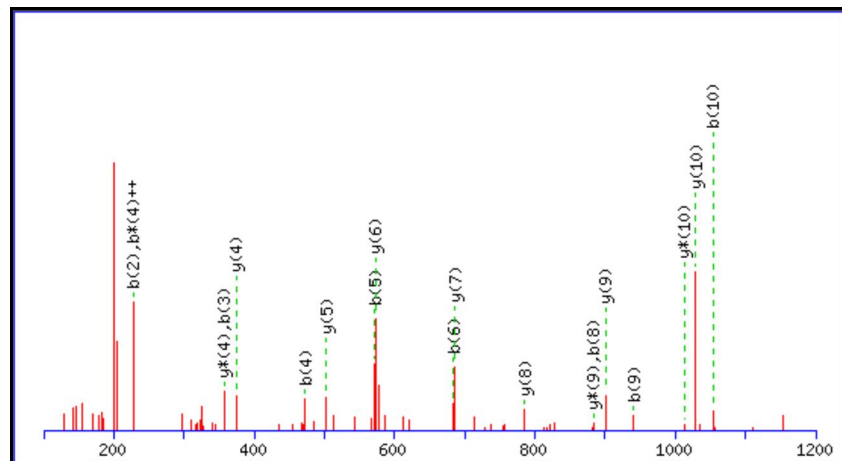

Monoisotopic mass of neutral peptide Mr(calc): 1255.6772

Fixed modifications: Carbamidomethyl (C)

Ions Score: 71 Expect: 3e-006

Matches (Bold Red): 19/112 fragment ions using 22 most intense peaks

| #  | b                | b <sup>++</sup> | b*        | b <sup>*++</sup> | b <sup>0</sup> | b <sup>0++</sup> | Seq. | y                | y <sup>++</sup> | y*               | y <sup>*++</sup> | y <sup>0</sup> | y <sup>0++</sup> | #  |
|----|------------------|-----------------|-----------|------------------|----------------|------------------|------|------------------|-----------------|------------------|------------------|----------------|------------------|----|
| 1  | 115.0502         | 58.0287         | 98.0237   | 49.5155          |                |                  | N    |                  |                 |                  |                  |                |                  | 12 |
| 2  | <b>228.1343</b>  | 114.5708        | 211.1077  | 106.0575         |                |                  | I    | 1142.6416        | 571.8244        | 1125.6150        | 563.3111         | 1124.6310      | 562.8191         | 11 |
| 3  | <b>357.1769</b>  | 179.0921        | 340.1503  | 170.5788         | 339.1663       | 170.0868         | E    | <b>1029.5575</b> | 515.2824        | <b>1012.5310</b> | 506.7691         | 1011.5469      | 506.2771         | 10 |
| 4  | <b>472.2038</b>  | 236.6055        | 455.1773  | <b>228.0923</b>  | 454.1932       | 227.6003         | D    | <b>900.5149</b>  | 450.7611        | <b>883.4884</b>  | 442.2478         | 882.5043       | 441.7558         | 9  |
| 5  | <b>571.2722</b>  | 286.1397        | 554.2457  | 277.6265         | 553.2617       | 277.1345         | V    | <b>785.4880</b>  | 393.2476        | 768.4614         | 384.7343         |                |                  | 8  |
| 6  | <b>684.3563</b>  | 342.6818        | 667.3297  | 334.1685         | 666.3457       | 333.6765         | I    | <b>686.4196</b>  | 343.7134        | 669.3930         | 335.2001         |                |                  | 7  |
| 7  | 755.3934         | 378.2003        | 738.3668  | 369.6871         | 737.3828       | 369.1951         | A    | <b>573.3355</b>  | 287.1714        | 556.3089         | 278.6581         |                |                  | 6  |
| 8  | <b>883.4520</b>  | 442.2296        | 866.4254  | 433.7164         | 865.4414       | 433.2243         | Q    | <b>502.2984</b>  | 251.6528        | 485.2718         | 243.1396         |                |                  | 5  |
| 9  | <b>940.4734</b>  | 470.7404        | 923.4469  | 462.2271         | 922.4629       | 461.7351         | G    | <b>374.2398</b>  | 187.6235        | <b>357.2132</b>  | 179.1103         |                |                  | 4  |
| 10 | <b>1053.5575</b> | 527.2824        | 1036.5310 | 518.7691         | 1035.5469      | 518.2771         | I    | 317.2183         | 159.1128        | 300.1918         | 150.5995         |                |                  | 3  |
| 11 | 1110.5790        | 555.7931        | 1093.5524 | 547.2798         | 1092.5684      | 546.7878         | G    | 204.1343         | 102.5708        | 187.1077         | 94.0575          |                |                  | 2  |
| 12 |                  |                 |           |                  |                |                  | K    | 147.1128         | 74.0600         | 130.0863         | 65.5468          |                |                  | 1  |

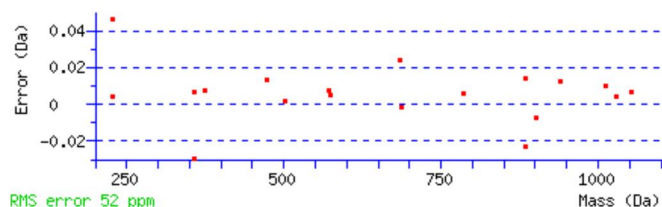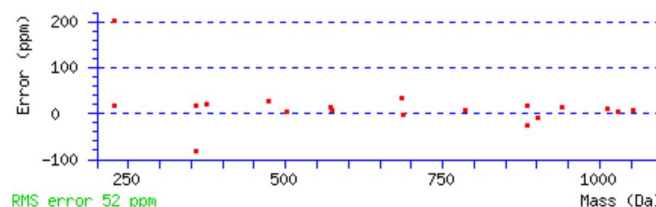

NCBI BLAST search of **NIEDVIAQGIGK**

(Parameters: blastp, nr protein database, expect=20000, no filter, PAM30)

Other BLAST [web gateways](#)

### All matches to this query

| Score | Mr(calc): | Delta   | Sequence                     |
|-------|-----------|---------|------------------------------|
| 70.6  | 1255.6772 | -0.0242 | <a href="#">NIEDVIAQGIGK</a> |
| 14.9  | 1255.6231 | 0.0299  | <a href="#">DMPKVLHDSSK</a>  |



|      |           |         |                              |
|------|-----------|---------|------------------------------|
| 12.3 | 1255.6006 | 0.0524  | <a href="#">YEDMLSLEK</a>    |
| 8.3  | 1255.6884 | -0.0354 | <a href="#">LGDAITALQQAR</a> |
| 7.7  | 1255.6884 | -0.0354 | <a href="#">ARAEALQEALGK</a> |
| 7.5  | 1255.6772 | -0.0242 | <a href="#">VQEEIDLVVGR</a>  |
| 6.2  | 1255.6958 | -0.0428 | <a href="#">LCPLSLTSLPR</a>  |
| 5.8  | 1255.6093 | 0.0437  | <a href="#">QVFPIMCAYK</a>   |
| 5.5  | 1255.6561 | -0.0031 | <a href="#">LNGSITSPGWPK</a> |
| 3.9  | 1255.6231 | 0.0299  | <a href="#">CHDVTAVVEVK</a>  |

**Mascot:** <http://www.matrixscience.com/>

# Mascot Search Results

## Peptide View

MS/MS Fragmentation of **AADFIDQALAQK**

Found in **P51452|DUS3\_HUMAN**, Dual specificity protein phosphatase 3 OS=Homo sapiens GN=DUSP3 PE=1 SV=1

Match to Query 21660: 1289.648268 from(645.831410,2+)

Title: Locus:10.1.1.6692.3

Click mouse within plot area to zoom in by factor of two about that point

Or,  100  to 1200  Da

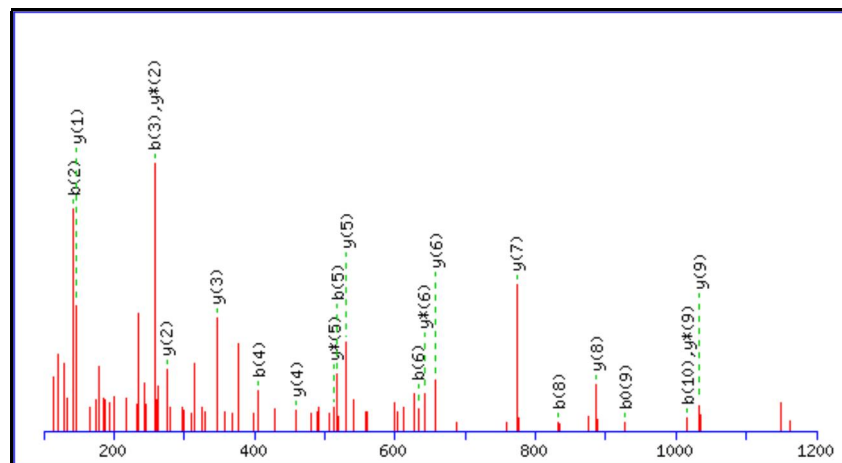

Monoisotopic mass of neutral peptide Mr(calc): 1289.6615

Fixed modifications: Carbamidomethyl (C)

Ions Score: 60 Expect: 3.1e-005

Matches (Bold Red): 21/104 fragment ions using 38 most intense peaks

| #  | b                | b <sup>++</sup> | b*        | b <sup>*++</sup> | b <sup>0</sup>  | b <sup>0++</sup> | Seq. | y                | y <sup>++</sup> | y*               | y <sup>*++</sup> | y <sup>0</sup> | y <sup>0++</sup> | #  |
|----|------------------|-----------------|-----------|------------------|-----------------|------------------|------|------------------|-----------------|------------------|------------------|----------------|------------------|----|
| 1  | 72.0444          | 36.5258         |           |                  |                 |                  | A    |                  |                 |                  |                  |                |                  | 12 |
| 2  | <b>143.0815</b>  | 72.0444         |           |                  |                 |                  | A    | 1219.6317        | 610.3195        | 1202.6052        | 601.8062         | 1201.6212      | 601.3142         | 11 |
| 3  | <b>258.1084</b>  | 129.5579        |           |                  | 240.0979        | 120.5526         | D    | 1148.5946        | 574.8009        | 1131.5681        | 566.2877         | 1130.5841      | 565.7957         | 10 |
| 4  | <b>405.1769</b>  | 203.0921        |           |                  | 387.1663        | 194.0868         | F    | <b>1033.5677</b> | 517.2875        | <b>1016.5411</b> | 508.7742         | 1015.5571      | 508.2822         | 9  |
| 5  | <b>518.2609</b>  | 259.6341        |           |                  | 500.2504        | 250.6288         | I    | <b>886.4993</b>  | 443.7533        | 869.4727         | 435.2400         | 868.4887       | 434.7480         | 8  |
| 6  | <b>633.2879</b>  | 317.1476        |           |                  | 615.2773        | 308.1423         | D    | <b>773.4152</b>  | 387.2112        | 756.3886         | 378.6980         | 755.4046       | 378.2060         | 7  |
| 7  | 761.3464         | 381.1769        | 744.3199  | 372.6636         | 743.3359        | 372.1716         | Q    | <b>658.3883</b>  | 329.6978        | <b>641.3617</b>  | 321.1845         |                |                  | 6  |
| 8  | <b>832.3836</b>  | 416.6954        | 815.3570  | 408.1821         | 814.3730        | 407.6901         | A    | <b>530.3297</b>  | 265.6685        | <b>513.3031</b>  | 257.1552         |                |                  | 5  |
| 9  | 945.4676         | 473.2375        | 928.4411  | 464.7242         | <b>927.4571</b> | 464.2322         | L    | <b>459.2926</b>  | 230.1499        | 442.2660         | 221.6366         |                |                  | 4  |
| 10 | <b>1016.5047</b> | 508.7560        | 999.4782  | 500.2427         | 998.4942        | 499.7507         | A    | <b>346.2085</b>  | 173.6079        | 329.1819         | 165.0946         |                |                  | 3  |
| 11 | 1144.5633        | 572.7853        | 1127.5368 | 564.2720         | 1126.5528       | 563.7800         | Q    | <b>275.1714</b>  | 138.0893        | <b>258.1448</b>  | 129.5761         |                |                  | 2  |
| 12 |                  |                 |           |                  |                 |                  | K    | <b>147.1128</b>  | 74.0600         | 130.0863         | 65.5468          |                |                  | 1  |

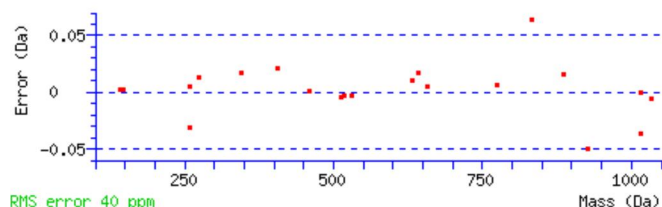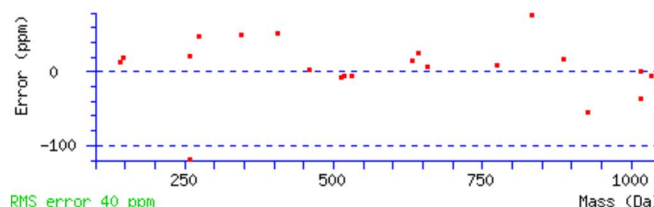

NCBI BLAST search of [AAADFIDQALAQK](#)

(Parameters: blastp, nr protein database, expect=20000, no filter, PAM30)

Other BLAST [web gateways](#)

### All matches to this query

| Score | Mr(calc): | Delta   | Sequence                      |
|-------|-----------|---------|-------------------------------|
| 60.3  | 1289.6615 | -0.0133 | <a href="#">AAADFIDQALAQK</a> |
| 18.5  | 1289.6074 | 0.0408  | <a href="#">CPFPAGSDLAQK</a>  |

|      |           |         |                               |
|------|-----------|---------|-------------------------------|
| 13.0 | 1289.7013 | -0.0530 | <a href="#">AEGTVVMKLAQK</a>  |
| 9.7  | 1289.6687 | -0.0205 | <a href="#">NLSSASQATRQK</a>  |
| 6.5  | 1289.6146 | 0.0336  | <a href="#">GMSAQGGAPSRQK</a> |
| 6.5  | 1289.6463 | 0.0020  | <a href="#">EDTQTLQSLQK</a>   |
| 6.0  | 1289.6108 | 0.0375  | <a href="#">CPPCLTSLSQK</a>   |
| 4.9  | 1289.6656 | -0.0173 | <a href="#">EKNSYYVFLK</a>    |
| 4.0  | 1289.6649 | -0.0166 | <a href="#">ESVTQIMKNPK</a>   |
| 3.4  | 1289.6728 | -0.0245 | <a href="#">DFLRLQQENK</a>    |

Mascot: <http://www.matrixscience.com/>

# Mascot Search Results

## Peptide View

MS/MS Fragmentation of **LVQSTLSDLR**

Found in **Q9BYN0|SRXN1\_HUMAN**, Sulfiredoxin-1 OS=Homo sapiens GN=SRXN1 PE=1 SV=2

Match to Query 18342: 1130.598228 from(566.306390,2+)

Title: Locus:12.1.1.6171.2

Click mouse within plot area to zoom in by factor of two about that point

Or,  100  1050

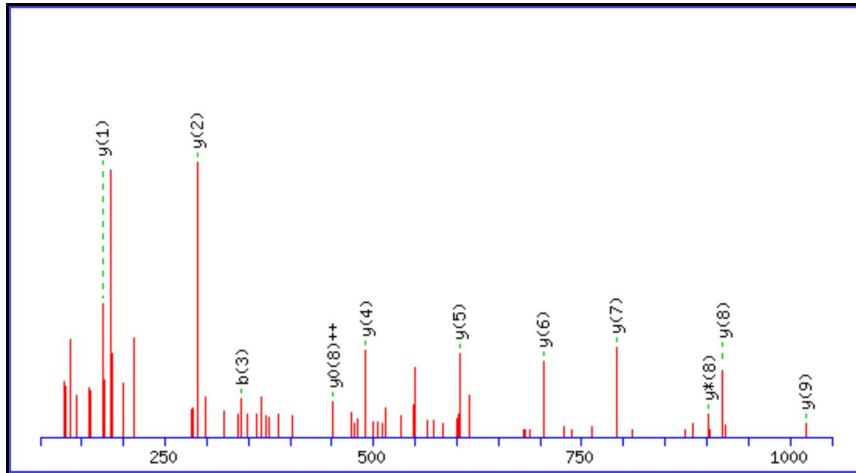

Monoisotopic mass of neutral peptide **Mr(calc):** 1130.6295

Fixed modifications: Carbamidomethyl (C)

Ions Score: 59 Expect: 4.8e-005

Matches (**Bold Red**): 11/94 fragment ions using 19 most intense peaks

| #  | b               | b <sup>++</sup> | b*       | b <sup>*++</sup> | b <sup>0</sup> | b <sup>0++</sup> | Seq. | y                | y <sup>++</sup> | y*              | y <sup>*++</sup> | y <sup>0</sup> | y <sup>0++</sup> | #  |
|----|-----------------|-----------------|----------|------------------|----------------|------------------|------|------------------|-----------------|-----------------|------------------|----------------|------------------|----|
| 1  | 114.0913        | 57.5493         |          |                  |                |                  | L    |                  |                 |                 |                  |                |                  | 10 |
| 2  | 213.1598        | 107.0835        |          |                  |                |                  | V    | <b>1018.5527</b> | 509.7800        | 1001.5262       | 501.2667         | 1000.5422      | 500.7747         | 9  |
| 3  | <b>341.2183</b> | 171.1128        | 324.1918 | 162.5995         |                |                  | Q    | <b>919.4843</b>  | 460.2458        | <b>902.4578</b> | 451.7325         | 901.4738       | <b>451.2405</b>  | 8  |
| 4  | 428.2504        | 214.6288        | 411.2238 | 206.1155         | 410.2398       | 205.6235         | S    | <b>791.4258</b>  | 396.2165        | 774.3992        | 387.7032         | 773.4152       | 387.2112         | 7  |
| 5  | 529.2980        | 265.1527        | 512.2715 | 256.6394         | 511.2875       | 256.1474         | T    | <b>704.3937</b>  | 352.7005        | 687.3672        | 344.1872         | 686.3832       | 343.6952         | 6  |
| 6  | 642.3821        | 321.6947        | 625.3556 | 313.1814         | 624.3715       | 312.6894         | L    | <b>603.3461</b>  | 302.1767        | 586.3195        | 293.6634         | 585.3355       | 293.1714         | 5  |
| 7  | 729.4141        | 365.2107        | 712.3876 | 356.6974         | 711.4036       | 356.2054         | S    | <b>490.2620</b>  | 245.6346        | 473.2354        | 237.1214         | 472.2514       | 236.6293         | 4  |
| 8  | 844.4411        | 422.7242        | 827.4145 | 414.2109         | 826.4305       | 413.7189         | D    | 403.2300         | 202.1186        | 386.2034        | 193.6053         | 385.2194       | 193.1133         | 3  |
| 9  | 957.5251        | 479.2662        | 940.4986 | 470.7529         | 939.5146       | 470.2609         | L    | <b>288.2030</b>  | 144.6051        | 271.1765        | 136.0919         |                |                  | 2  |
| 10 |                 |                 |          |                  |                |                  | R    | <b>175.1190</b>  | 88.0631         | 158.0924        | 79.5498          |                |                  | 1  |

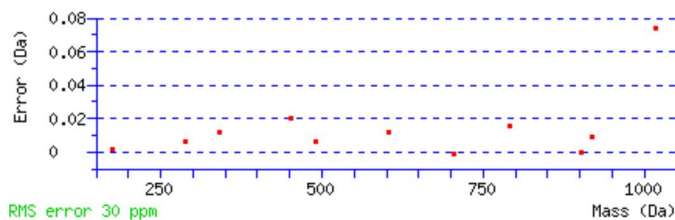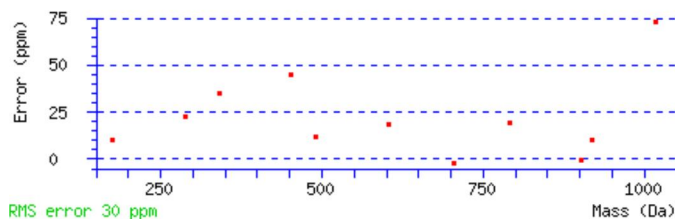

NCBI BLAST search of **LVQSTLSDLR**

(Parameters: blastp, nr protein database, expect=20000, no filter, PAM30)

Other BLAST [web gateways](#)

**All matches to this query**

| Score | Mr(calc): | Delta   | Sequence                    |
|-------|-----------|---------|-----------------------------|
| 59.1  | 1130.6295 | -0.0313 | <a href="#">LVQSTLSDLR</a>  |
| 11.5  | 1130.5576 | 0.0406  | <a href="#">VIQPMGMSPR</a>  |
| 10.7  | 1130.5866 | 0.0116  | <a href="#">LVAGPSKCSGR</a> |
| 7.9   | 1130.5931 | 0.0051  | <a href="#">KAEEALSDLR</a>  |
| 5.7   | 1130.6448 | -0.0465 | <a href="#">LWTKIDLSR</a>   |
| 5.7   | 1130.6230 | -0.0248 | <a href="#">VIRLSDCLR</a>   |
| 5.7   | 1130.6448 | -0.0466 | <a href="#">VLVGEFAQIR</a>  |
| 5.2   | 1130.5567 | 0.0415  | <a href="#">QLESAIEDAR</a>  |
| 5.2   | 1130.6084 | -0.0102 | <a href="#">LLNYAGEVPR</a>  |
| 4.9   | 1130.5792 | 0.0190  | <a href="#">LVGRNSDTNR</a>  |

Mascot: <http://www.matrixscience.com/>

# **MATRIX** SCIENCE Mascot Search Results

## Peptide View

MS/MS Fragmentation of **VVVLGLLPR**

Found in **Q15102|PA1B3\_HUMAN**, Platelet-activating factor acetylhydrolase IB subunit gamma  
 OS=Homo sapiens GN=PAFAH1B3 PE=1 SV=1

Match to Query 3719: 964.627448 from(483.321000,2+)

Title: Locus:9.1.1.6336.2

Click mouse within plot area to zoom in by factor of two about that point

Or,   to  Da

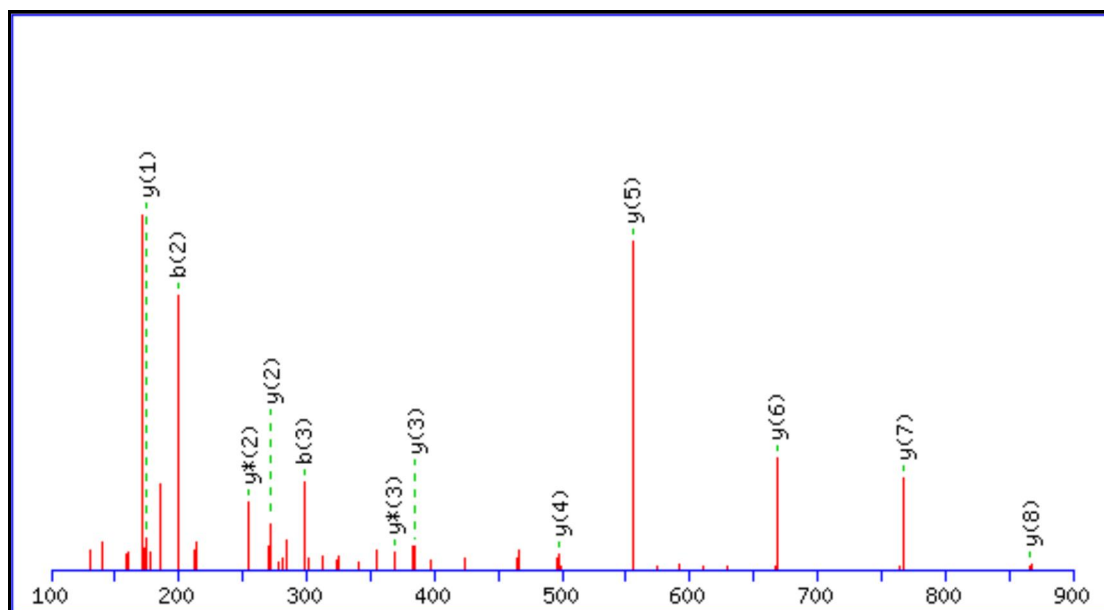

**Monoisotopic mass of neutral peptide Mr(calc):** 964.6433

**Fixed modifications:** Carbamidomethyl (C)

**Ions Score:** 58 **Expect:** 1e-005

**Matches (Bold Red):** 12/48 fragment ions using 27 most intense peaks

| # | b               | b <sup>++</sup> | Seq.     | y               | y <sup>++</sup> | y*              | y* <sup>++</sup> | # |
|---|-----------------|-----------------|----------|-----------------|-----------------|-----------------|------------------|---|
| 1 | 100.0757        | 50.5415         | <b>V</b> |                 |                 |                 |                  | 9 |
| 2 | <b>199.1441</b> | 100.0757        | <b>V</b> | <b>866.5822</b> | 433.7947        | 849.5557        | 425.2815         | 8 |
| 3 | <b>298.2125</b> | 149.6099        | <b>V</b> | <b>767.5138</b> | 384.2605        | 750.4872        | 375.7473         | 7 |
| 4 | 411.2966        | 206.1519        | <b>L</b> | <b>668.4454</b> | 334.7263        | 651.4188        | 326.2130         | 6 |
| 5 | 468.3180        | 234.6627        | <b>G</b> | <b>555.3613</b> | 278.1843        | 538.3348        | 269.6710         | 5 |
| 6 | 581.4021        | 291.2047        | <b>L</b> | <b>498.3398</b> | 249.6736        | 481.3133        | 241.1603         | 4 |
| 7 | 694.4862        | 347.7467        | <b>L</b> | <b>385.2558</b> | 193.1315        | <b>368.2292</b> | 184.6183         | 3 |
| 8 | 791.5389        | 396.2731        | <b>P</b> | <b>272.1717</b> | 136.5895        | <b>255.1452</b> | 128.0762         | 2 |
| 9 |                 |                 | <b>R</b> | <b>175.1190</b> | 88.0631         | 158.0924        | 79.5498          | 1 |

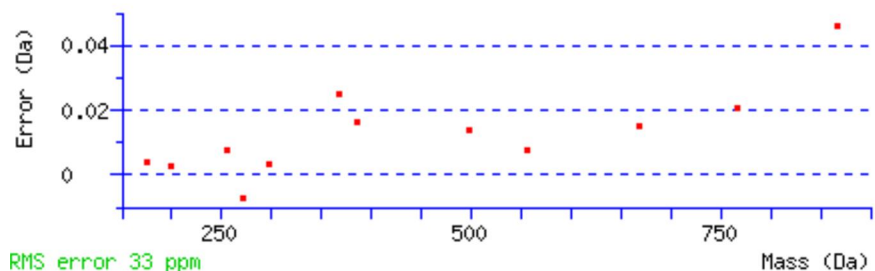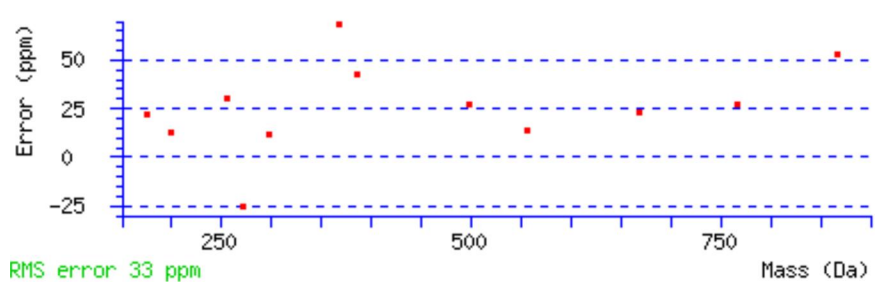

NCBI **BLAST** search of [VVVLGLLPR](#)  
 (Parameters: blastp, nr protein database, expect=20000, no filter, PAM30)  
 Other BLAST [web gateways](#)

**All matches to this query**

| Score | Mr(calc): | Delta   | Sequence                  |
|-------|-----------|---------|---------------------------|
| 57.6  | 964.6433  | -0.0159 | <a href="#">VVVLGLLPR</a> |
| 6.5   | 964.5930  | 0.0344  | <a href="#">VVKGRPGPR</a> |
| 4.0   | 964.6069  | 0.0205  | <a href="#">IIAVATLHK</a> |

**Mascot:** <http://www.matrixscience.com/>

# **MASCOT** SCIENCE Mascot Search Results

## Peptide View

MS/MS Fragmentation of **GSAITGPVAK**

Found in **P62829|RL23\_HUMAN**, 60S ribosomal protein L23 OS=Homo sapiens GN=RPL23 PE=1 SV=1

Match to Query 11810: 899.478848 from(450.746700,2+)

Title: Locus:12.1.1.5797.2

Click mouse within plot area to zoom in by factor of two about that point

Or,   to  Da

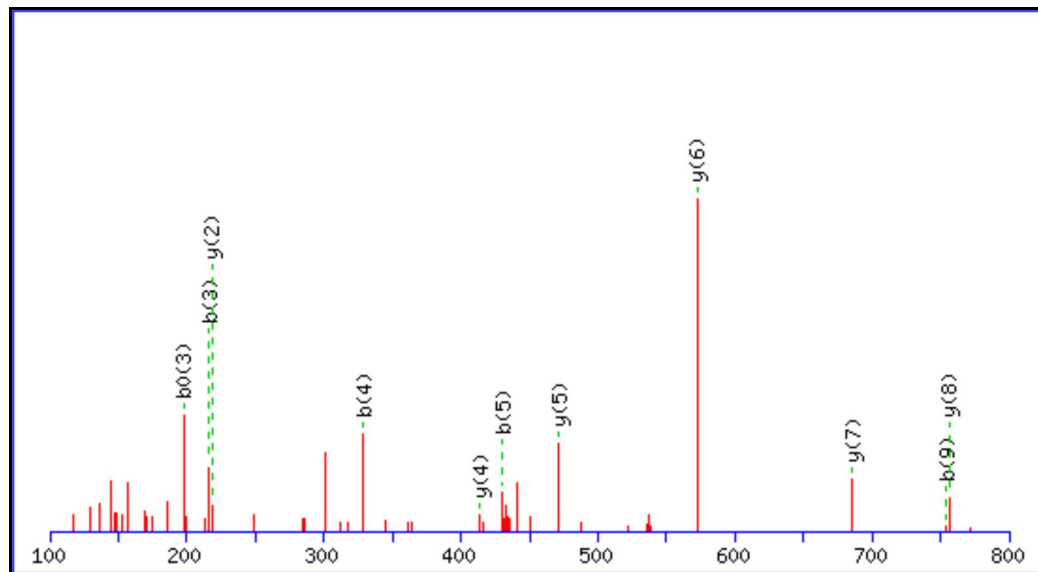

**Monoisotopic mass of neutral peptide Mr(calc):** 899.5076

**Fixed modifications:** Carbamidomethyl (C)

**Ions Score:** 56 **Expect:** 9.4e-005

**Matches (Bold Red):** 11/78 fragment ions using 15 most intense peaks

| #  | b               | b <sup>++</sup> | b <sup>0</sup>  | b <sup>0++</sup> | Seq.     | y               | y <sup>++</sup> | y*       | y <sup>*++</sup> | y <sup>0</sup> | y <sup>0++</sup> | #         |
|----|-----------------|-----------------|-----------------|------------------|----------|-----------------|-----------------|----------|------------------|----------------|------------------|-----------|
| 1  | 58.0287         | 29.5180         |                 |                  | <b>G</b> |                 |                 |          |                  |                |                  | <b>10</b> |
| 2  | 145.0608        | 73.0340         | 127.0502        | 64.0287          | <b>S</b> | 843.4934        | 422.2504        | 826.4669 | 413.7371         | 825.4829       | 413.2451         | <b>9</b>  |
| 3  | <b>216.0979</b> | 108.5526        | <b>198.0873</b> | 99.5473          | <b>A</b> | <b>756.4614</b> | 378.7343        | 739.4349 | 370.2211         | 738.4509       | 369.7291         | <b>8</b>  |
| 4  | <b>329.1819</b> | 165.0946        | 311.1714        | 156.0893         | <b>I</b> | <b>685.4243</b> | 343.2158        | 668.3978 | 334.7025         | 667.4137       | 334.2105         | <b>7</b>  |
| 5  | <b>430.2296</b> | 215.6185        | 412.2191        | 206.6132         | <b>T</b> | <b>572.3402</b> | 286.6738        | 555.3137 | 278.1605         | 554.3297       | 277.6685         | <b>6</b>  |
| 6  | 487.2511        | 244.1292        | 469.2405        | 235.1239         | <b>G</b> | <b>471.2926</b> | 236.1499        | 454.2660 | 227.6366         |                |                  | <b>5</b>  |
| 7  | 584.3039        | 292.6556        | 566.2933        | 283.6503         | <b>P</b> | <b>414.2711</b> | 207.6392        | 397.2445 | 199.1259         |                |                  | <b>4</b>  |
| 8  | 683.3723        | 342.1898        | 665.3617        | 333.1845         | <b>V</b> | 317.2183        | 159.1128        | 300.1918 | 150.5995         |                |                  | <b>3</b>  |
| 9  | <b>754.4094</b> | 377.7083        | 736.3988        | 368.7030         | <b>A</b> | <b>218.1499</b> | 109.5786        | 201.1234 | 101.0653         |                |                  | <b>2</b>  |
| 10 |                 |                 |                 |                  | <b>K</b> | 147.1128        | 74.0600         | 130.0863 | 65.5468          |                |                  | <b>1</b>  |



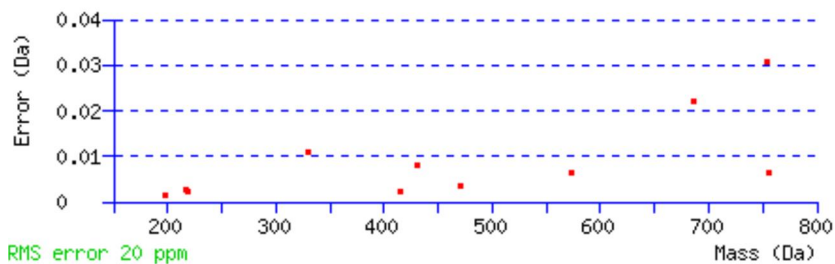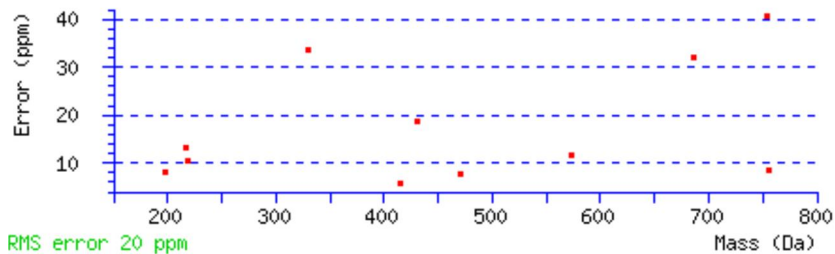

NCBI **BLAST** search of [GSAITGPVAK](#)

(Parameters: blastp, nr protein database, expect=20000, no filter, PAM30)

Other BLAST [web gateways](#)

**All matches to this query**

| Score | Mr(calc): | Delta   | Sequence                   |
|-------|-----------|---------|----------------------------|
| 55.6  | 899.5076  | -0.0288 | <a href="#">GSAITGPVAK</a> |
| 9.5   | 899.5076  | -0.0288 | <a href="#">KAEPLASGK</a>  |
| 8.0   | 899.5189  | -0.0400 | <a href="#">DNVVRVAK</a>   |
| 7.9   | 899.4348  | 0.0440  | <a href="#">EAQPEAGAK</a>  |
| 7.5   | 899.4609  | 0.0180  | <a href="#">KSFMMIK</a>    |
| 7.5   | 899.4609  | 0.0180  | <a href="#">KSFMMIK</a>    |
| 7.5   | 899.4609  | 0.0180  | <a href="#">KSFMMLK</a>    |
| 7.5   | 899.4609  | 0.0180  | <a href="#">KSFMMLK</a>    |
| 6.8   | 899.4712  | 0.0076  | <a href="#">DSPIGNLGK</a>  |
| 5.8   | 899.4647  | 0.0142  | <a href="#">REIHMAK</a>    |

**Mascot:** <http://www.matrixscience.com/>

# Mascot Search Results

## Peptide View

MS/MS Fragmentation of **GVQVETISPGDGR**

Found in **P62942|FKB1A\_HUMAN**, Peptidyl-prolyl cis-trans isomerase FKBP1A OS=Homo sapiens GN=FKBP1A PE=1 SV=2

Match to Query 34264: 1313.635668 from(657.825110,2+)

Title: Locus:13.1.1.6308.2

Click mouse within plot area to zoom in by factor of two about that point

Or,  100  1200

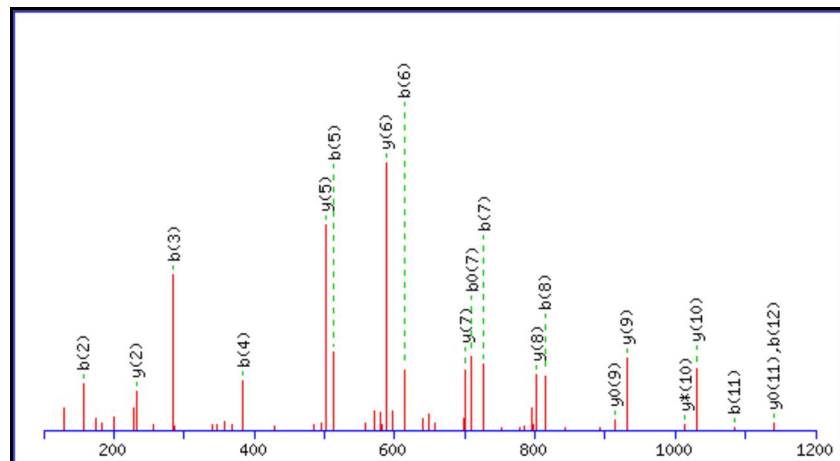

Monoisotopic mass of neutral peptide **Mr(calc):** 1313.6576

Fixed modifications: Carbamidomethyl (C)

Ions Score: 88 Expect: 4.5e-008

Matches (**Bold Red**): 20/128 fragment ions using 22 most intense peaks

| #  | b                | b <sup>++</sup> | b*        | b <sup>*++</sup> | b <sup>0</sup>  | b <sup>0++</sup> | Seq.     | y                | y <sup>++</sup> | y*               | y <sup>*++</sup> | y <sup>0</sup>   | y <sup>0++</sup> | #         |
|----|------------------|-----------------|-----------|------------------|-----------------|------------------|----------|------------------|-----------------|------------------|------------------|------------------|------------------|-----------|
| 1  | 58.0287          | 29.5180         |           |                  |                 |                  | <b>G</b> |                  |                 |                  |                  |                  |                  | <b>13</b> |
| 2  | <b>157.0972</b>  | 79.0522         |           |                  |                 |                  | <b>V</b> | 1257.6434        | 629.3253        | 1240.6168        | 620.8120         | 1239.6328        | 620.3200         | <b>12</b> |
| 3  | <b>285.1557</b>  | 143.0815        | 268.1292  | 134.5682         |                 |                  | <b>Q</b> | 1158.5749        | 579.7911        | 1141.5484        | 571.2778         | <b>1140.5644</b> | 570.7858         | <b>11</b> |
| 4  | <b>384.2241</b>  | 192.6157        | 367.1976  | 184.1024         |                 |                  | <b>V</b> | <b>1030.5164</b> | 515.7618        | <b>1013.4898</b> | 507.2485         | 1012.5058        | 506.7565         | <b>10</b> |
| 5  | <b>513.2667</b>  | 257.1370        | 496.2402  | 248.6237         | 495.2562        | 248.1317         | <b>E</b> | <b>931.4480</b>  | 466.2276        | 914.4214         | 457.7143         | <b>913.4374</b>  | 457.2223         | <b>9</b>  |
| 6  | <b>614.3144</b>  | 307.6608        | 597.2879  | 299.1476         | 596.3039        | 298.6556         | <b>T</b> | <b>802.4054</b>  | 401.7063        | 785.3788         | 393.1930         | 784.3948         | 392.7010         | <b>8</b>  |
| 7  | <b>727.3985</b>  | 364.2029        | 710.3719  | 355.6896         | <b>709.3879</b> | 355.1976         | <b>I</b> | <b>701.3577</b>  | 351.1825        | 684.3311         | 342.6692         | 683.3471         | 342.1772         | <b>7</b>  |
| 8  | <b>814.4305</b>  | 407.7189        | 797.4040  | 399.2056         | 796.4199        | 398.7136         | <b>S</b> | <b>588.2736</b>  | 294.6404        | 571.2471         | 286.1272         | 570.2630         | 285.6352         | <b>6</b>  |
| 9  | 911.4833         | 456.2453        | 894.4567  | 447.7320         | 893.4727        | 447.2400         | <b>P</b> | <b>501.2416</b>  | 251.1244        | 484.2150         | 242.6112         | 483.2310         | 242.1191         | <b>5</b>  |
| 10 | 968.5047         | 484.7560        | 951.4782  | 476.2427         | 950.4942        | 475.7507         | <b>G</b> | 404.1888         | 202.5980        | 387.1623         | 194.0848         | 386.1783         | 193.5928         | <b>4</b>  |
| 11 | <b>1083.5317</b> | 542.2695        | 1066.5051 | 533.7562         | 1065.5211       | 533.2642         | <b>D</b> | 347.1674         | 174.0873        | 330.1408         | 165.5740         | 329.1568         | 165.0820         | <b>3</b>  |
| 12 | <b>1140.5531</b> | 570.7802        | 1123.5266 | 562.2669         | 1122.5426       | 561.7749         | <b>G</b> | <b>232.1404</b>  | 116.5738        | 215.1139         | 108.0606         |                  |                  | <b>2</b>  |
| 13 |                  |                 |           |                  |                 |                  | <b>R</b> | 175.1190         | 88.0631         | 158.0924         | 79.5498          |                  |                  | <b>1</b>  |

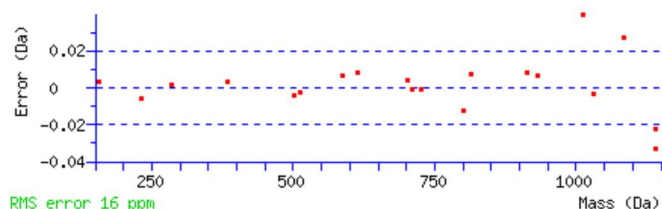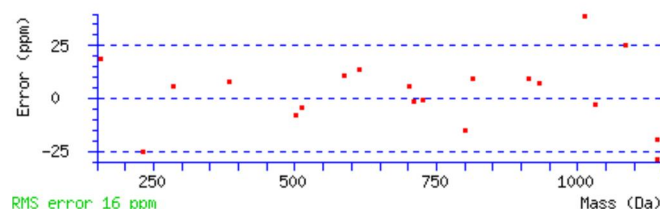

NCBI BLAST search of **GVQVETISPGDGR**

(Parameters: blastp, nr protein database, expect=20000, no filter, PAM30)

Other BLAST [web gateways](#)

All matches to this query

| Score | Mr(calc): | Delta   | Sequence             |
|-------|-----------|---------|----------------------|
| 87.8  | 1313.6576 | -0.0219 | <b>GVQVETISPGDGR</b> |

|      |           |         |                               |
|------|-----------|---------|-------------------------------|
| 13.8 | 1313.6324 | 0.0033  | <a href="#">ARGDTGADEAVPR</a> |
| 10.0 | 1313.6688 | -0.0331 | <a href="#">VGQLRQDVEDR</a>   |
| 7.8  | 1313.6687 | -0.0331 | <a href="#">LNELQEERQR</a>    |
| 7.2  | 1313.6993 | -0.0636 | <a href="#">GKVTGFHNWIR</a>   |
| 6.6  | 1313.6762 | -0.0405 | <a href="#">MLAAQGVDPGLAR</a> |
| 5.8  | 1313.6324 | 0.0033  | <a href="#">QELRSNGEER</a>    |
| 2.5  | 1313.6768 | -0.0411 | <a href="#">AWKVLTDYR</a>     |
| 2.5  | 1313.6939 | -0.0582 | <a href="#">KAELDIDALNGR</a>  |
| 2.2  | 1313.6840 | -0.0484 | <a href="#">QPTWSRSSLPR</a>   |

**Mascot:** <http://www.matrixscience.com/>

**Mascot Search Results**

**Peptide View**

MS/MS Fragmentation of **TIQVDNTDAEGR**

Found in **P28838|AMPL\_HUMAN**, Cytosol aminopeptidase OS=Homo sapiens GN=LAP3 PE=1 SV=3

Match to Query 34398: 1317.626568 from(659.820560,2+)

Title: Locus:5.1.1.6129.3

Click mouse within plot area to zoom in by factor of two about that point

Or,  100  1150

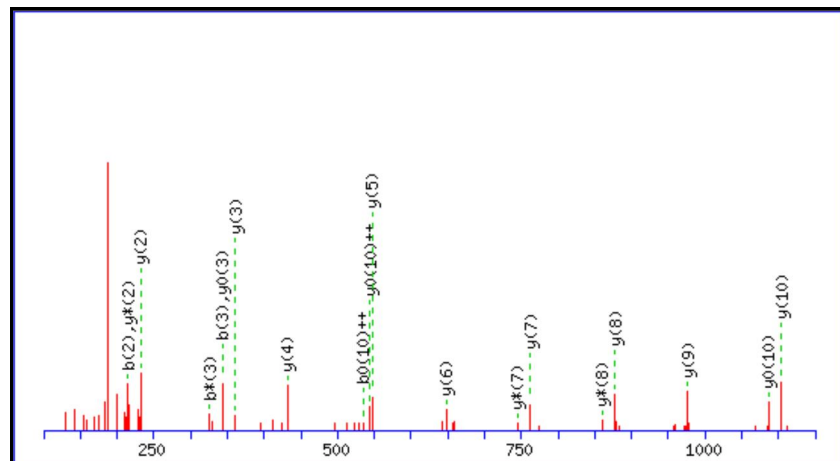

Monoisotopic mass of neutral peptide Mr(calc): 1317.6161

Fixed modifications: Carbamidomethyl (C)

Ions Score: 84 Expect: 1.2e-007

Matches (Bold Red): 19/124 fragment ions using 21 most intense peaks

| #  | b               | b <sup>++</sup> | b*              | b <sup>*++</sup> | b <sup>0</sup> | b <sup>0++</sup> | Seq. | y                | y <sup>++</sup> | y*              | y <sup>*++</sup> | y <sup>0</sup>   | y <sup>0++</sup> | #  |
|----|-----------------|-----------------|-----------------|------------------|----------------|------------------|------|------------------|-----------------|-----------------|------------------|------------------|------------------|----|
| 1  | 102.0550        | 51.5311         |                 |                  | 84.0444        | 42.5258          | T    |                  |                 |                 |                  |                  |                  | 12 |
| 2  | <b>215.1390</b> | 108.0731        |                 |                  | 197.1285       | 99.0679          | I    | 1217.5757        | 609.2915        | 1200.5491       | 600.7782         | 1199.5651        | 600.2862         | 11 |
| 3  | <b>343.1976</b> | 172.1024        | <b>326.1710</b> | 163.5892         | 325.1870       | 163.0972         | Q    | <b>1104.4916</b> | 552.7494        | 1087.4651       | 544.2362         | <b>1086.4810</b> | <b>543.7442</b>  | 10 |
| 4  | 442.2660        | 221.6366        | 425.2395        | 213.1234         | 424.2554       | 212.6314         | V    | <b>976.4330</b>  | 488.7202        | 959.4065        | 480.2069         | 958.4225         | 479.7149         | 9  |
| 5  | 557.2930        | 279.1501        | 540.2664        | 270.6368         | 539.2824       | 270.1448         | D    | <b>877.3646</b>  | 439.1859        | <b>860.3381</b> | 430.6727         | 859.3540         | 430.1807         | 8  |
| 6  | 671.3359        | 336.1716        | 654.3093        | 327.6583         | 653.3253       | 327.1663         | N    | <b>762.3377</b>  | 381.6725        | <b>745.3111</b> | 373.1592         | 744.3271         | 372.6672         | 7  |
| 7  | 772.3836        | 386.6954        | 755.3570        | 378.1821         | 754.3730       | 377.6901         | T    | <b>648.2947</b>  | 324.6510        | 631.2682        | 316.1377         | 630.2842         | 315.6457         | 6  |
| 8  | 887.4105        | 444.2089        | 870.3840        | 435.6956         | 869.3999       | 435.2036         | D    | <b>547.2471</b>  | 274.1272        | 530.2205        | 265.6139         | 529.2365         | 265.1219         | 5  |
| 9  | 958.4476        | 479.7274        | 941.4211        | 471.2142         | 940.4371       | 470.7222         | A    | <b>432.2201</b>  | 216.6137        | 415.1936        | 208.1004         | 414.2096         | 207.6084         | 4  |
| 10 | 1087.4902       | 544.2487        | 1070.4637       | 535.7355         | 1069.4796      | <b>535.2435</b>  | E    | <b>361.1830</b>  | 181.0951        | 344.1565        | 172.5819         | <b>343.1724</b>  | 172.0899         | 3  |
| 11 | 1144.5117       | 572.7595        | 1127.4851       | 564.2462         | 1126.5011      | 563.7542         | G    | <b>232.1404</b>  | 116.5738        | <b>215.1139</b> | 108.0606         |                  |                  | 2  |
| 12 |                 |                 |                 |                  |                |                  | R    | 175.1190         | 88.0631         | 158.0924        | 79.5498          |                  |                  | 1  |

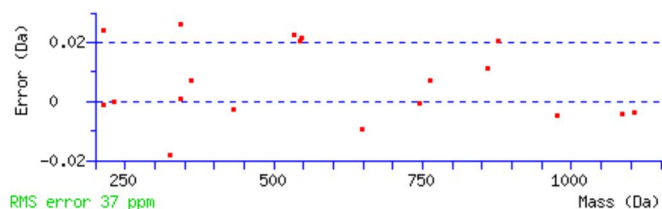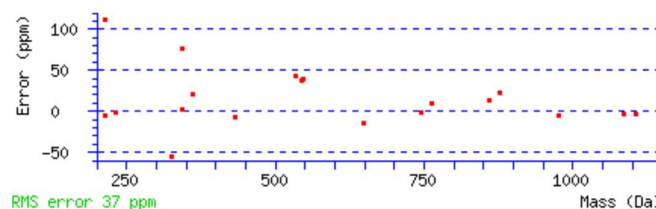

NCBI BLAST search of [TIQVDNTDAEGR](#)

(Parameters: blastp, nr protein database, expect=20000, no filter, PAM30)

Other BLAST [web gateways](#)

**All matches to this query**

| Score | Mr(calc): | Delta  | Sequence                     |
|-------|-----------|--------|------------------------------|
| 83.9  | 1317.6161 | 0.0105 | <a href="#">TIQVDNTDAEGR</a> |
| 29.2  | 1317.6161 | 0.0105 | <a href="#">TVEINNTDAEGR</a> |

|     |           |         |                              |
|-----|-----------|---------|------------------------------|
| 0.9 | 1317.6070 | 0.0195  | <a href="#">WMMEGQRGAPR</a>  |
| 0.9 | 1317.6731 | -0.0465 | <a href="#">WRWGSVWVR</a>    |
| 0.8 | 1317.6711 | -0.0445 | <a href="#">RLLLMEEEGGR</a>  |
| 0.7 | 1317.6387 | -0.0121 | <a href="#">GEWTCKPIAEK</a>  |
| 0.7 | 1317.6248 | 0.0018  | <a href="#">VSNMFNLHAGGR</a> |
| 0.3 | 1317.6830 | -0.0564 | <a href="#">TIQHKYTNWK</a>   |
| 0.3 | 1317.6048 | 0.0217  | <a href="#">VSELTEEPDSGR</a> |

**Mascot:** <http://www.matrixscience.com/>

# Mascot Search Results

## Peptide View

MS/MS Fragmentation of **ALGQNPTNAEVLK**

Found in **P14649|MYL6B\_HUMAN**, Myosin light chain 6B OS=Homo sapiens GN=MYL6B PE=1 SV=1

Match to Query 34828: 1353.709228 from(677.861890,2+)

Title: Locus:12.1.1.6777.2

Click mouse within plot area to zoom in by factor of two about that point

Or,  100  1300

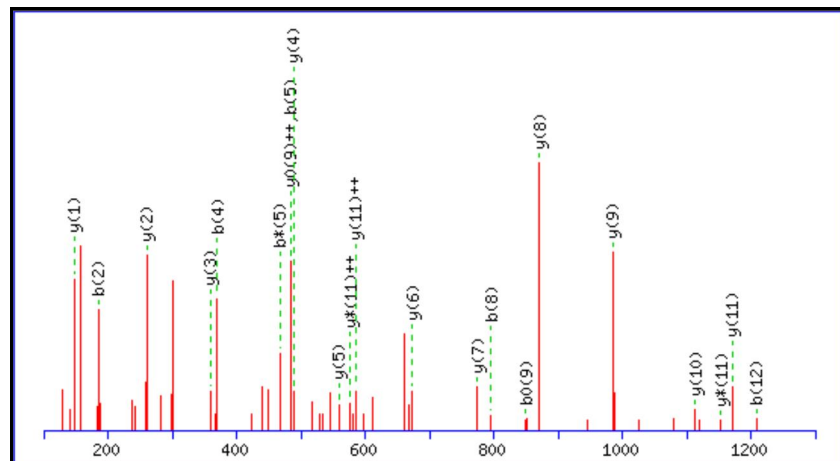

Monoisotopic mass of neutral peptide  $M_r(\text{calc})$ : 1353.7252

Fixed modifications: Carbamidomethyl (C)

Ions Score: 77 Expect: 5.5e-007

Matches (**Bold Red**): 22/120 fragment ions using 43 most intense peaks

| #  | b                | b <sup>++</sup> | b*              | b <sup>*++</sup> | b <sup>0</sup>  | b <sup>0++</sup> | Seq.     | y                | y <sup>++</sup> | y*               | y <sup>*++</sup> | y <sup>0</sup> | y <sup>0++</sup> | #         |
|----|------------------|-----------------|-----------------|------------------|-----------------|------------------|----------|------------------|-----------------|------------------|------------------|----------------|------------------|-----------|
| 1  | 72.0444          | 36.5258         |                 |                  |                 |                  | <b>A</b> |                  |                 |                  |                  |                |                  | <b>13</b> |
| 2  | <b>185.1285</b>  | 93.0679         |                 |                  |                 |                  | <b>L</b> | 1283.6954        | 642.3513        | 1266.6688        | 633.8381         | 1265.6848      | 633.3461         | <b>12</b> |
| 3  | 242.1499         | 121.5786        |                 |                  |                 |                  | <b>G</b> | <b>1170.6113</b> | <b>585.8093</b> | <b>1153.5848</b> | <b>577.2960</b>  | 1152.6008      | 576.8040         | <b>11</b> |
| 4  | <b>370.2085</b>  | 185.6079        | 353.1819        | 177.0946         |                 |                  | <b>Q</b> | <b>1113.5899</b> | 557.2986        | 1096.5633        | 548.7853         | 1095.5793      | 548.2933         | <b>10</b> |
| 5  | <b>484.2514</b>  | 242.6293        | <b>467.2249</b> | 234.1161         |                 |                  | <b>N</b> | <b>985.5313</b>  | 493.2693        | 968.5047         | 484.7560         | 967.5207       | <b>484.2640</b>  | <b>9</b>  |
| 6  | 581.3042         | 291.1557        | 564.2776        | 282.6425         |                 |                  | <b>P</b> | <b>871.4884</b>  | 436.2478        | 854.4618         | 427.7345         | 853.4778       | 427.2425         | <b>8</b>  |
| 7  | 682.3519         | 341.6796        | 665.3253        | 333.1663         | 664.3413        | 332.6743         | <b>T</b> | <b>774.4356</b>  | 387.7214        | 757.4090         | 379.2082         | 756.4250       | 378.7162         | <b>7</b>  |
| 8  | <b>796.3948</b>  | 398.7010        | 779.3682        | 390.1878         | 778.3842        | 389.6958         | <b>N</b> | <b>673.3879</b>  | 337.1976        | 656.3614         | 328.6843         | 655.3774       | 328.1923         | <b>6</b>  |
| 9  | 867.4319         | 434.2196        | 850.4054        | 425.7063         | <b>849.4213</b> | 425.2143         | <b>A</b> | <b>559.3450</b>  | 280.1761        | 542.3184         | 271.6629         | 541.3344       | 271.1709         | <b>5</b>  |
| 10 | 996.4745         | 498.7409        | 979.4480        | 490.2276         | 978.4639        | 489.7356         | <b>E</b> | <b>488.3079</b>  | 244.6576        | 471.2813         | 236.1443         | 470.2973       | 235.6523         | <b>4</b>  |
| 11 | 1095.5429        | 548.2751        | 1078.5164       | 539.7618         | 1077.5323       | 539.2698         | <b>V</b> | <b>359.2653</b>  | 180.1363        | 342.2387         | 171.6230         |                |                  | <b>3</b>  |
| 12 | <b>1208.6270</b> | 604.8171        | 1191.6004       | 596.3039         | 1190.6164       | 595.8118         | <b>L</b> | <b>260.1969</b>  | 130.6021        | 243.1703         | 122.0888         |                |                  | <b>2</b>  |
| 13 |                  |                 |                 |                  |                 |                  | <b>K</b> | <b>147.1128</b>  | 74.0600         | 130.0863         | 65.5468          |                |                  | <b>1</b>  |

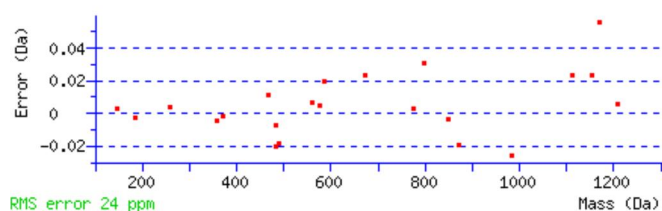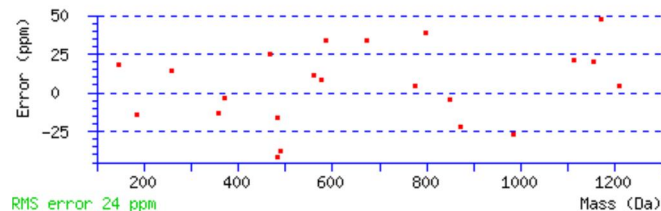

NCBI BLAST search of **ALGQNPTNAEVLK**

(Parameters: blastp, nr protein database, expect=20000, no filter, PAM30)

Other BLAST [web gateways](#)

### All matches to this query

| Score | $M_r(\text{calc})$ : | Delta   | Sequence             |
|-------|----------------------|---------|----------------------|
| 77.4  | 1353.7252            | -0.0160 | <b>ALGQNPTNAEVLK</b> |

|     |           |         |                              |
|-----|-----------|---------|------------------------------|
| 6.0 | 1353.6816 | 0.0276  | <a href="#">SPDFYEEVKIK</a>  |
| 5.5 | 1353.6520 | 0.0573  | <a href="#">LQMSITEIMEK</a>  |
| 4.8 | 1353.6459 | 0.0633  | <a href="#">GQSCNNLPLSHK</a> |
| 3.4 | 1353.6850 | 0.0243  | <a href="#">KMFEEAELLK</a>   |
| 3.1 | 1353.6823 | 0.0269  | <a href="#">KHATQGTMSHLK</a> |
| 0.7 | 1353.7625 | -0.0532 | <a href="#">AMHKCILKPLK</a>  |
| 0.3 | 1353.6962 | 0.0130  | <a href="#">YGMVAQVTQTLK</a> |
| 0.2 | 1353.7728 | -0.0636 | <a href="#">RAQQEQLLLQK</a>  |

**Mascot:** <http://www.matrixscience.com/>

# MASCOT SCIENCE Mascot Search Results

## Peptide View

MS/MS Fragmentation of **ASASDGSSFVVAR**

Found in **Q9H4G4/GAPRI\_HUMAN**, Golgi-associated plant pathogenesis-related protein 1 OS=Homo sapiens  
GN=GLIPR2 PE=1 SV=3

Match to Query 33118: 1252.601148 from(627.307850,2+)

Title: Locus:12.1.1.6739.3

Click mouse within plot area to zoom in by factor of two about that point

Or,  100  1100

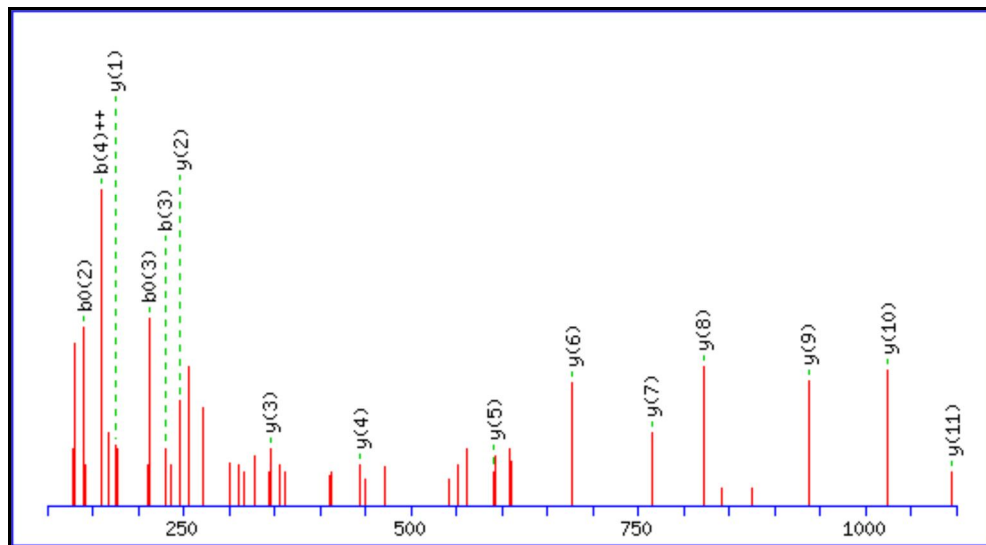

Monoisotopic mass of neutral peptide Mr(calc): 1252.6048

Fixed modifications: Carbamidomethyl (C)

Ions Score: 76 Expect: 7.5e-007

Matches (Bold Red): 16/108 fragment ions using 35 most intense peaks

| #  | b               | b <sup>++</sup> | b <sup>0</sup>  | b <sup>0++</sup> | Seq.     | y                | y <sup>++</sup> | y*        | y* <sup>++</sup> | y <sup>0</sup> | y <sup>0++</sup> | #         |
|----|-----------------|-----------------|-----------------|------------------|----------|------------------|-----------------|-----------|------------------|----------------|------------------|-----------|
| 1  | 72.0444         | 36.5258         |                 |                  | <b>A</b> |                  |                 |           |                  |                |                  | <b>13</b> |
| 2  | <b>159.0764</b> | 80.0418         | <b>141.0659</b> | 71.0366          | <b>S</b> | 1182.5749        | 591.7911        | 1165.5484 | 583.2778         | 1164.5644      | 582.7858         | <b>12</b> |
| 3  | <b>230.1135</b> | 115.5604        | <b>212.1030</b> | 106.5551         | <b>A</b> | <b>1095.5429</b> | 548.2751        | 1078.5164 | 539.7618         | 1077.5323      | 539.2698         | <b>11</b> |
| 4  | 317.1456        | <b>159.0764</b> | 299.1350        | 150.0711         | <b>S</b> | <b>1024.5058</b> | 512.7565        | 1007.4792 | 504.2433         | 1006.4952      | 503.7513         | <b>10</b> |
| 5  | 432.1725        | 216.5899        | 414.1619        | 207.5846         | <b>D</b> | <b>937.4738</b>  | 469.2405        | 920.4472  | 460.7272         | 919.4632       | 460.2352         | <b>9</b>  |
| 6  | 489.1940        | 245.1006        | 471.1834        | 236.0953         | <b>G</b> | <b>822.4468</b>  | 411.7271        | 805.4203  | 403.2138         | 804.4363       | 402.7218         | <b>8</b>  |
| 7  | 576.2260        | 288.6166        | 558.2154        | 279.6114         | <b>S</b> | <b>765.4254</b>  | 383.2163        | 748.3988  | 374.7030         | 747.4148       | 374.2110         | <b>7</b>  |
| 8  | 663.2580        | 332.1326        | 645.2475        | 323.1274         | <b>S</b> | <b>678.3933</b>  | 339.7003        | 661.3668  | 331.1870         | 660.3828       | 330.6950         | <b>6</b>  |
| 9  | 810.3264        | 405.6669        | 792.3159        | 396.6616         | <b>F</b> | <b>591.3613</b>  | 296.1843        | 574.3348  | 287.6710         |                |                  | <b>5</b>  |
| 10 | 909.3949        | 455.2011        | 891.3843        | 446.1958         | <b>V</b> | <b>444.2929</b>  | 222.6501        | 427.2663  | 214.1368         |                |                  | <b>4</b>  |
| 11 | 1008.4633       | 504.7353        | 990.4527        | 495.7300         | <b>V</b> | <b>345.2245</b>  | 173.1159        | 328.1979  | 164.6026         |                |                  | <b>3</b>  |
| 12 | 1079.5004       | 540.2538        | 1061.4898       | 531.2485         | <b>A</b> | <b>246.1561</b>  | 123.5817        | 229.1295  | 115.0684         |                |                  | <b>2</b>  |
| 13 |                 |                 |                 |                  | <b>R</b> | <b>175.1190</b>  | 88.0631         | 158.0924  | 79.5498          |                |                  | <b>1</b>  |



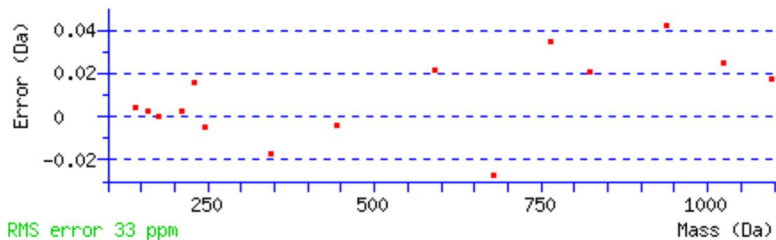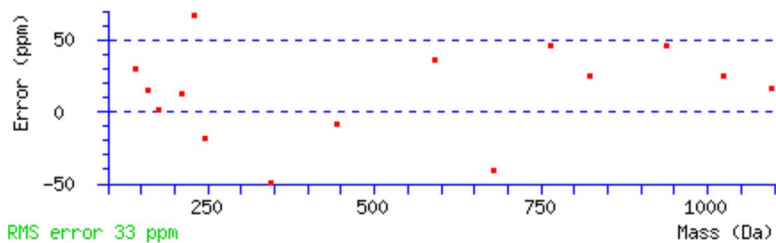

NCBI **BLAST** search of [ASASDGSSFVVAR](#)

(Parameters: blastp, nr protein database, expect=20000, no filter, PAM30)

Other BLAST [web gateways](#)

**All matches to this query**

| Score | Mr(calc): | Delta   | Sequence                      |
|-------|-----------|---------|-------------------------------|
| 76.1  | 1252.6048 | -0.0036 | <a href="#">ASASDGSSFVVAR</a> |
| 2.4   | 1252.5969 | 0.0042  | <a href="#">TGSKTDAVAEMK</a>  |
| 0.9   | 1252.5718 | 0.0294  | <a href="#">AGESVTLSCSSR</a>  |

Mascot: <http://www.matrixscience.com/>

# MASCOT SCIENCE Mascot Search Results

## Peptide View

MS/MS Fragmentation of **VAEDEAEAAAAAK**

Found in **P08195|4F2\_HUMAN**, 4F2 cell-surface antigen heavy chain OS=Homo sapiens GN=SLC3A2 PE=1 SV=3

Match to Query 32969: 1244.606668 from(623.310610,2+)

Title: Locus:4.1.1.5813.3

Click mouse within plot area to zoom in by factor of two about that point

Or,  100 to 1200 Da

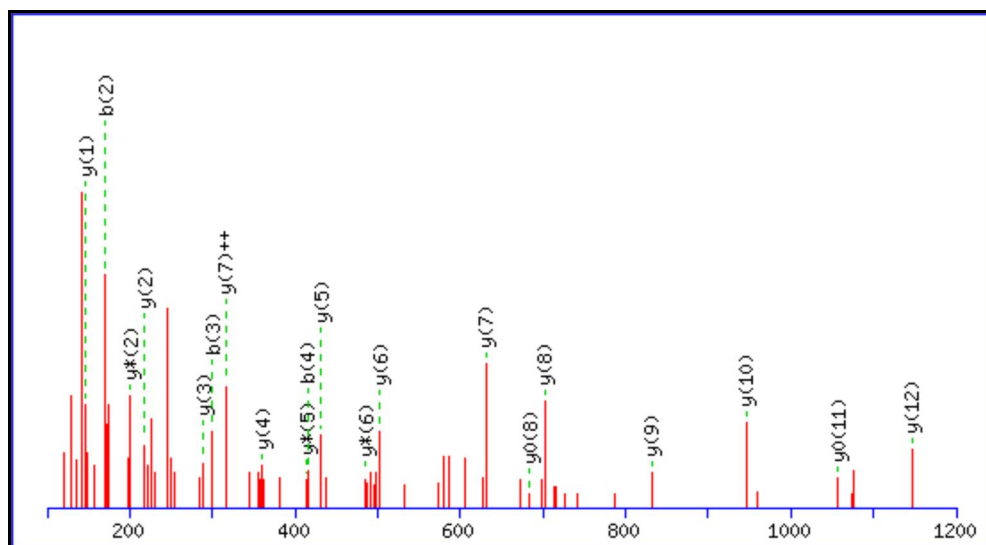

Monoisotopic mass of neutral peptide **Mr(calc):** 1244.5884

Fixed modifications: Carbamidomethyl (C)

Ions Score: 59 Expect: 4.4e-005

Matches (**Bold Red**): 20/104 fragment ions using 56 most intense peaks

| #  | b               | b <sup>++</sup> | b <sup>0</sup> | b <sup>0++</sup> | Seq. | y                | y <sup>++</sup> | y*              | y <sup>*++</sup> | y <sup>0</sup>   | y <sup>0++</sup> | #  |
|----|-----------------|-----------------|----------------|------------------|------|------------------|-----------------|-----------------|------------------|------------------|------------------|----|
| 1  | 100.0757        | 50.5415         |                |                  | V    |                  |                 |                 |                  |                  |                  | 13 |
| 2  | <b>171.1128</b> | 86.0600         |                |                  | A    | <b>1146.5273</b> | 573.7673        | 1129.5008       | 565.2540         | 1128.5168        | 564.7620         | 12 |
| 3  | <b>300.1554</b> | 150.5813        | 282.1448       | 141.5761         | E    | 1075.4902        | 538.2487        | 1058.4637       | 529.7355         | <b>1057.4796</b> | 529.2435         | 11 |
| 4  | <b>415.1823</b> | 208.0948        | 397.1718       | 199.0895         | D    | <b>946.4476</b>  | 473.7274        | 929.4211        | 465.2142         | 928.4371         | 464.7222         | 10 |
| 5  | 544.2249        | 272.6161        | 526.2144       | 263.6108         | E    | <b>831.4207</b>  | 416.2140        | 814.3941        | 407.7007         | 813.4101         | 407.2087         | 9  |
| 6  | 615.2620        | 308.1347        | 597.2515       | 299.1294         | A    | <b>702.3781</b>  | 351.6927        | 685.3515        | 343.1794         | <b>684.3675</b>  | 342.6874         | 8  |
| 7  | 744.3046        | 372.6560        | 726.2941       | 363.6507         | E    | <b>631.3410</b>  | <b>316.1741</b> | 614.3144        | 307.6608         | 613.3304         | 307.1688         | 7  |
| 8  | 815.3418        | 408.1745        | 797.3312       | 399.1692         | A    | <b>502.2984</b>  | 251.6528        | <b>485.2718</b> | 243.1396         |                  |                  | 6  |
| 9  | 886.3789        | 443.6931        | 868.3683       | 434.6878         | A    | <b>431.2613</b>  | 216.1343        | <b>414.2347</b> | 207.6210         |                  |                  | 5  |
| 10 | 957.4160        | 479.2116        | 939.4054       | 470.2063         | A    | <b>360.2241</b>  | 180.6157        | 343.1976        | 172.1024         |                  |                  | 4  |
| 11 | 1028.4531       | 514.7302        | 1010.4425      | 505.7249         | A    | <b>289.1870</b>  | 145.0972        | 272.1605        | 136.5839         |                  |                  | 3  |
| 12 | 1099.4902       | 550.2487        | 1081.4796      | 541.2435         | A    | <b>218.1499</b>  | 109.5786        | <b>201.1234</b> | 101.0653         |                  |                  | 2  |
| 13 |                 |                 |                |                  | K    | <b>147.1128</b>  | 74.0600         | 130.0863        | 65.5468          |                  |                  | 1  |

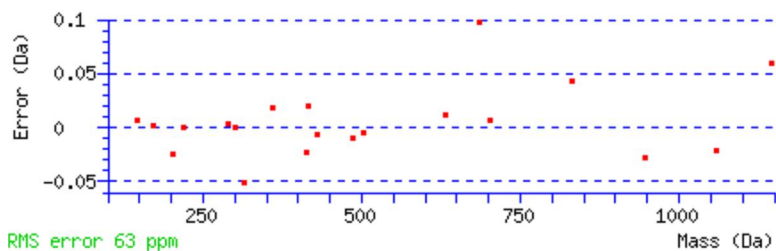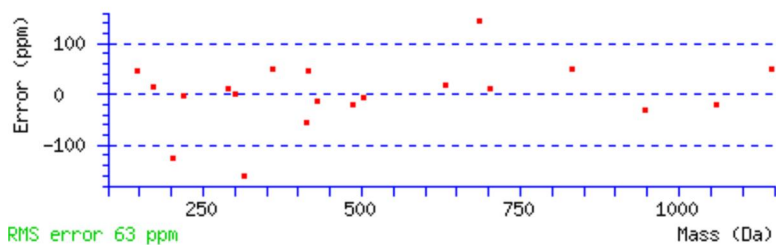

NCBI **BLAST** search of [VAEDEAEAAAAAK](#)

(Parameters: blastp, nr protein database, expect=20000, no filter, PAM30)

Other BLAST [web gateways](#)

**All matches to this query**

| Score | Mr(calc): | Delta   | Sequence                      |
|-------|-----------|---------|-------------------------------|
| 58.9  | 1244.5884 | 0.0183  | <a href="#">VAEDEAEAAAAAK</a> |
| 5.2   | 1244.6473 | -0.0406 | <a href="#">TAELSLGRNER</a>   |
| 4.5   | 1244.5932 | 0.0135  | <a href="#">KSQAAPGSSPCR</a>  |
| 4.3   | 1244.6361 | -0.0294 | <a href="#">TVTLDVDVNNR</a>   |
| 2.2   | 1244.6547 | -0.0480 | <a href="#">SPSIMGILANR</a>   |
| 1.3   | 1244.6248 | -0.0182 | <a href="#">EDSVEAVGAQLK</a>  |

**Mascot:** <http://www.matrixscience.com/>

# **MATRIX SCIENCE** Mascot Search Results

## Peptide View

MS/MS Fragmentation of **TGEIQFSR**

Found in **Q86SJ6|DSG4\_HUMAN**, Desmoglein-4 OS=Homo sapiens GN=DSG4 PE=1 SV=1

Match to Query 6637: 936.447428 from(469.230990,2+)

Title: Locus:13.1.1.6249.2

Click mouse within plot area to zoom in by factor of two about that point

Or,   to  Da

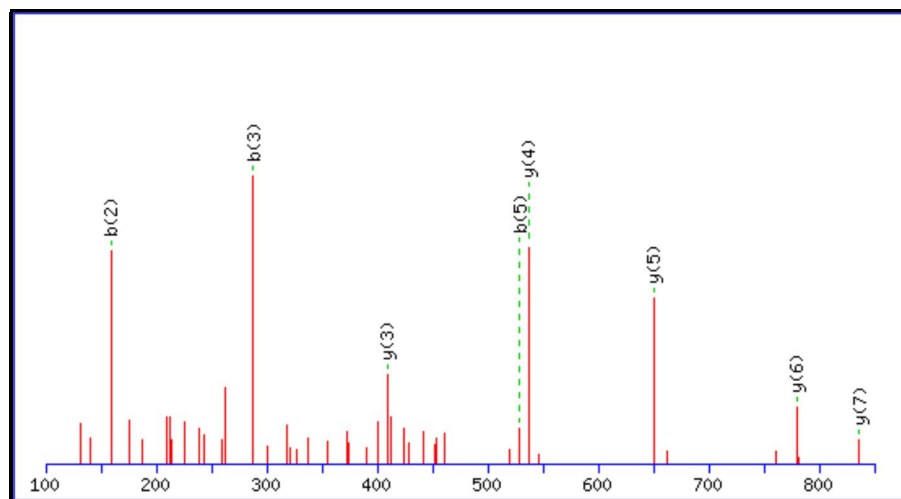

Monoisotopic mass of neutral peptide Mr(calc): 936.4665

Fixed modifications: Carbamidomethyl (C)

Ions Score: 52 Expect: 0.00045

Matches (**Bold Red**): 8/74 fragment ions using 9 most intense peaks

| # | b               | b <sup>++</sup> | b*       | b <sup>*++</sup> | b <sup>0</sup> | b <sup>0++</sup> | Seq.     | y               | y <sup>++</sup> | y*       | y <sup>*++</sup> | y <sup>0</sup> | y <sup>0++</sup> | # |
|---|-----------------|-----------------|----------|------------------|----------------|------------------|----------|-----------------|-----------------|----------|------------------|----------------|------------------|---|
| 1 | 102.0550        | 51.5311         |          |                  | 84.0444        | 42.5258          | <b>T</b> |                 |                 |          |                  |                |                  | 8 |
| 2 | <b>159.0764</b> | 80.0418         |          |                  | 141.0659       | 71.0366          | <b>G</b> | <b>836.4261</b> | 418.7167        | 819.3995 | 410.2034         | 818.4155       | 409.7114         | 7 |
| 3 | <b>288.1190</b> | 144.5631        |          |                  | 270.1084       | 135.5579         | <b>E</b> | <b>779.4046</b> | 390.2060        | 762.3781 | 381.6927         | 761.3941       | 381.2007         | 6 |
| 4 | 401.2031        | 201.1052        |          |                  | 383.1925       | 192.0999         | <b>I</b> | <b>650.3620</b> | 325.6847        | 633.3355 | 317.1714         | 632.3515       | 316.6794         | 5 |
| 5 | <b>529.2617</b> | 265.1345        | 512.2351 | 256.6212         | 511.2511       | 256.1292         | <b>Q</b> | <b>537.2780</b> | 269.1426        | 520.2514 | 260.6293         | 519.2674       | 260.1373         | 4 |
| 6 | 676.3301        | 338.6687        | 659.3035 | 330.1554         | 658.3195       | 329.6634         | <b>F</b> | <b>409.2194</b> | 205.1133        | 392.1928 | 196.6001         | 391.2088       | 196.1081         | 3 |
| 7 | 763.3621        | 382.1847        | 746.3355 | 373.6714         | 745.3515       | 373.1794         | <b>S</b> | 262.1510        | 131.5791        | 245.1244 | 123.0659         | 244.1404       | 122.5738         | 2 |
| 8 |                 |                 |          |                  |                |                  | <b>R</b> | 175.1190        | 88.0631         | 158.0924 | 79.5498          |                |                  | 1 |

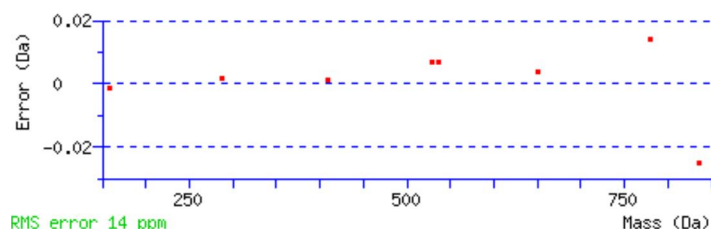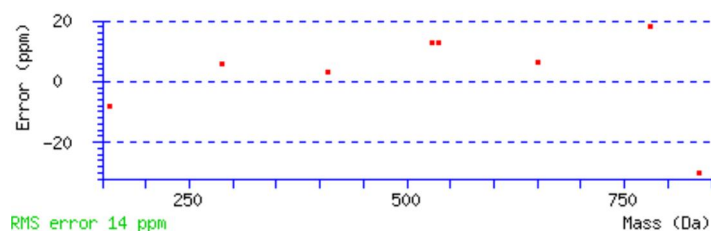

NCBI BLAST search of **TGEIQFSR**

(Parameters: blastp, nr protein database, expect=20000, no filter, PAM30)

Other BLAST [web gateways](#)

**All matches to this query**

| Score | Mr(cal): | Delta   | Sequence                  |
|-------|----------|---------|---------------------------|
| 52.2  | 936.4665 | -0.0191 | <a href="#">TGEIQFSR</a>  |
| 16.9  | 936.4739 | -0.0264 | <a href="#">TWKLMDK</a>   |
| 11.5  | 936.4222 | 0.0252  | <a href="#">TVAEQDMK</a>  |
| 6.1   | 936.4157 | 0.0317  | <a href="#">MCNDLLR</a>   |
| 5.5   | 936.4885 | -0.0411 | <a href="#">MGVLMSKR</a>  |
| 5.1   | 936.4521 | -0.0047 | <a href="#">MLRQMDK</a>   |
| 5.0   | 936.4665 | -0.0190 | <a href="#">TALENFSR</a>  |
| 3.1   | 936.4777 | -0.0303 | <a href="#">SSSFRTPR</a>  |
| 2.4   | 936.4149 | 0.0326  | <a href="#">TGSESSVDR</a> |
| 2.0   | 936.4851 | -0.0377 | <a href="#">WTKSMLR</a>   |

**Mascot:** <http://www.matrixscience.com/>

# MASCOT SCIENCE Mascot Search Results

## Peptide View

MS/MS Fragmentation of **ITNIQCPK**

Found in **P80075|CCL8\_HUMAN**, C-C motif chemokine 8 OS=Homo sapiens GN=CCL8 PE=1 SV=2

Match to Query 25315: 972.497628 from(487.256090,2+)

Title: Locus:13.1.1.5953.2

Click mouse within plot area to zoom in by factor of two about that point

Or,  100 to 900 Da

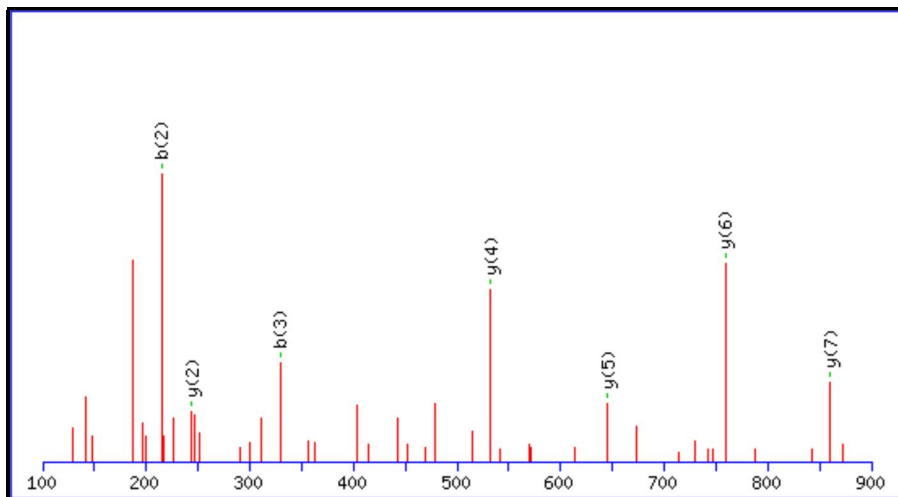

Monoisotopic mass of neutral peptide Mr(calc): 972.5062

Fixed modifications: Carbamidomethyl (C)

Ions Score: 52 Expect: 0.00026

Matches (**Red Bold**): 7/66 fragment ions using 8 most intense peaks

| # | b               | b <sup>++</sup> | b*       | b <sup>*++</sup> | b <sup>0</sup> | b <sup>0++</sup> | Seq. | y               | y <sup>++</sup> | y*       | y <sup>*++</sup> | y <sup>0</sup> | y <sup>0++</sup> | # |
|---|-----------------|-----------------|----------|------------------|----------------|------------------|------|-----------------|-----------------|----------|------------------|----------------|------------------|---|
| 1 | 114.0913        | 57.5493         |          |                  |                |                  | I    |                 |                 |          |                  |                |                  | 8 |
| 2 | <b>215.1390</b> | 108.0731        |          |                  | 197.1285       | 99.0679          | T    | <b>860.4295</b> | 430.7184        | 843.4029 | 422.2051         | 842.4189       | 421.7131         | 7 |
| 3 | <b>329.1819</b> | 165.0946        | 312.1554 | 156.5813         | 311.1714       | 156.0893         | N    | <b>759.3818</b> | 380.1945        | 742.3552 | 371.6813         |                |                  | 6 |
| 4 | 442.2660        | 221.6366        | 425.2395 | 213.1234         | 424.2554       | 212.6314         | I    | <b>645.3389</b> | 323.1731        | 628.3123 | 314.6598         |                |                  | 5 |
| 5 | 570.3246        | 285.6659        | 553.2980 | 277.1527         | 552.3140       | 276.6606         | Q    | <b>532.2548</b> | 266.6310        | 515.2282 | 258.1178         |                |                  | 4 |
| 6 | 730.3552        | 365.6813        | 713.3287 | 357.1680         | 712.3447       | 356.6760         | C    | 404.1962        | 202.6017        | 387.1697 | 194.0885         |                |                  | 3 |
| 7 | 827.4080        | 414.2076        | 810.3815 | 405.6944         | 809.3974       | 405.2024         | P    | <b>244.1656</b> | 122.5864        | 227.1390 | 114.0731         |                |                  | 2 |
| 8 |                 |                 |          |                  |                |                  | K    | 147.1128        | 74.0600         | 130.0863 | 65.5468          |                |                  | 1 |

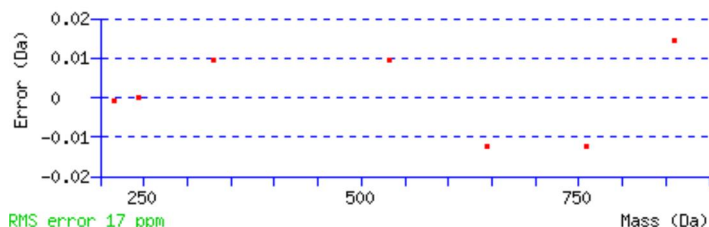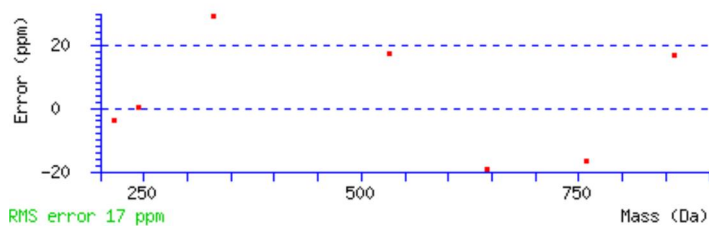

NCBI BLAST search of **ITNIQCPK**

(Parameters: blastp, nr protein database, expect=20000, no filter, PAM30)

Other BLAST [web gateways](#)

**All matches to this query**

| Score | Mr(cal): | Delta   | Sequence                   |
|-------|----------|---------|----------------------------|
| 51.9  | 972.5062 | -0.0086 | <a href="#">ITNIQCPK</a>   |
| 19.5  | 972.5240 | -0.0264 | <a href="#">LTNEVELR</a>   |
| 16.4  | 972.5392 | -0.0416 | <a href="#">LTWNKSPK</a>   |
| 11.3  | 972.5240 | -0.0264 | <a href="#">LTPEERTK</a>   |
| 9.0   | 972.4989 | -0.0012 | <a href="#">LGTQSTGPGR</a> |
| 8.6   | 972.5240 | -0.0264 | <a href="#">TIHEDNR</a>    |
| 7.5   | 972.4988 | -0.0012 | <a href="#">EGGNQNKVK</a>  |
| 6.8   | 972.4512 | 0.0464  | <a href="#">VSNNAEDPK</a>  |
| 6.6   | 972.4559 | 0.0417  | <a href="#">NDVCRPGR</a>   |
| 6.3   | 972.5352 | -0.0376 | <a href="#">ITGPSQRSK</a>  |

**Mascot:** <http://www.matrixscience.com/>

# **MASCOT** SCIENCE Mascot Search Results

## Peptide View

MS/MS Fragmentation of **DGYAQILR**

Found in **Q99798|ACON\_HUMAN**, Aconitate hydratase, mitochondrial OS=Homo sapiens GN=ACO2 PE=1 SV=2

Match to Query 6622: 934.510468 from(468.262510,2+)

Title: Locus:4.1.1.6077.2

Click mouse within plot area to zoom in by factor of two about that point

Or,   to  Da

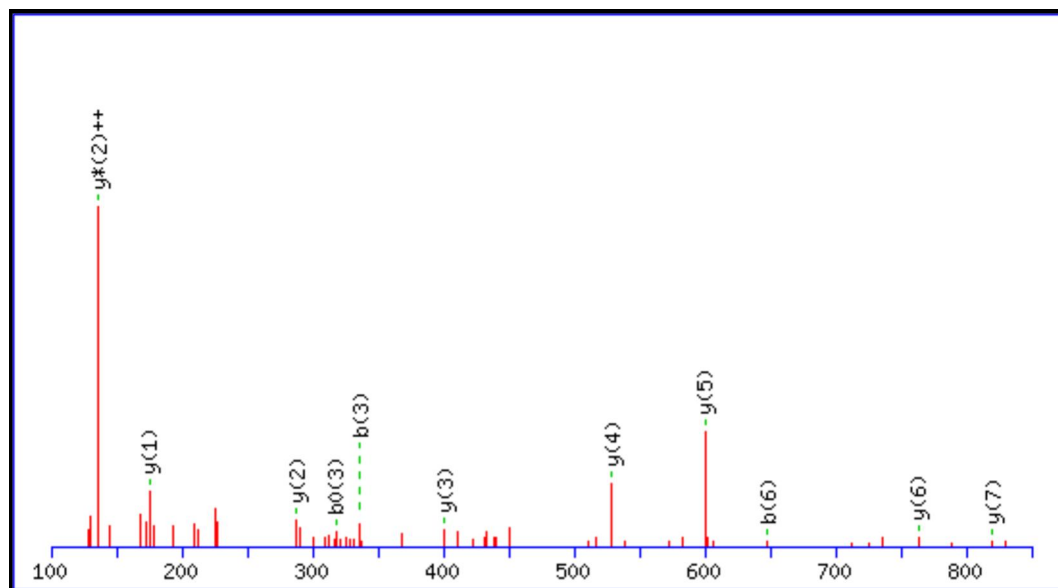

**Monoisotopic mass of neutral peptide Mr(calc):** 934.4872

**Fixed modifications:** Carbamidomethyl (C)

**Ions Score:** 50 **Expect:** 0.0012

**Matches (Bold Red):** 11/62 fragment ions using 23 most intense peaks

| # | b               | b <sup>++</sup> | b*       | b <sup>*++</sup> | b <sup>0</sup>  | b <sup>0++</sup> | Seq.     | y               | y <sup>++</sup> | y*       | y <sup>*++</sup> | #        |
|---|-----------------|-----------------|----------|------------------|-----------------|------------------|----------|-----------------|-----------------|----------|------------------|----------|
| 1 | 116.0342        | 58.5207         |          |                  | 98.0237         | 49.5155          | <b>D</b> |                 |                 |          |                  | <b>8</b> |
| 2 | 173.0557        | 87.0315         |          |                  | 155.0451        | 78.0262          | <b>G</b> | <b>820.4676</b> | 410.7374        | 803.4410 | 402.2241         | <b>7</b> |
| 3 | <b>336.1190</b> | 168.5631        |          |                  | <b>318.1084</b> | 159.5579         | <b>Y</b> | <b>763.4461</b> | 382.2267        | 746.4196 | 373.7134         | <b>6</b> |
| 4 | 407.1561        | 204.0817        |          |                  | 389.1456        | 195.0764         | <b>A</b> | <b>600.3828</b> | 300.6950        | 583.3562 | 292.1817         | <b>5</b> |
| 5 | 535.2147        | 268.1110        | 518.1882 | 259.5977         | 517.2041        | 259.1057         | <b>Q</b> | <b>529.3457</b> | 265.1765        | 512.3191 | 256.6632         | <b>4</b> |
| 6 | <b>648.2988</b> | 324.6530        | 631.2722 | 316.1397         | 630.2882        | 315.6477         | <b>I</b> | <b>401.2871</b> | 201.1472        | 384.2605 | 192.6339         | <b>3</b> |
| 7 | 761.3828        | 381.1951        | 744.3563 | 372.6818         | 743.3723        | 372.1898         | <b>L</b> | <b>288.2030</b> | 144.6051        | 271.1765 | <b>136.0919</b>  | <b>2</b> |
| 8 |                 |                 |          |                  |                 |                  | <b>R</b> | <b>175.1190</b> | 88.0631         | 158.0924 | 79.5498          | <b>1</b> |



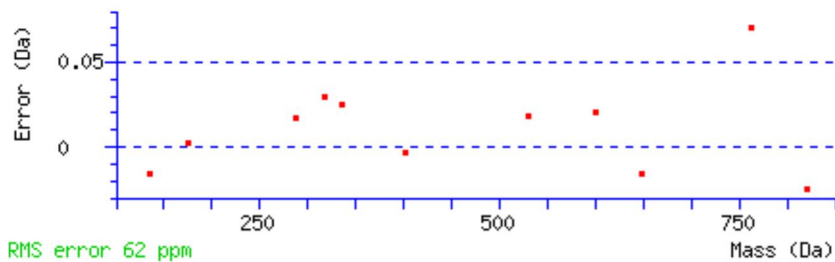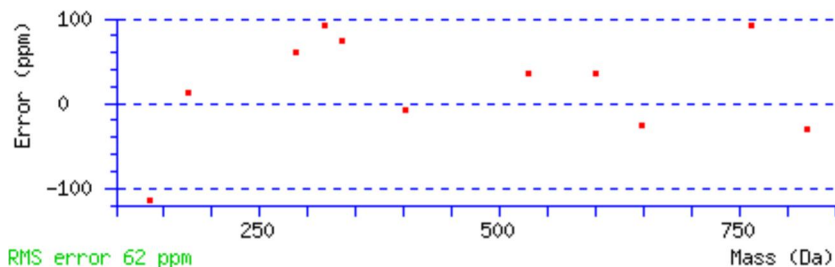

NCBI **BLAST** search of [DGYAQILR](#)

(Parameters: blastp, nr protein database, expect=20000, no filter, PAM30)

Other BLAST [web gateways](#)

**All matches to this query**

| Score | Mr(calc): | Delta   | Sequence                  |
|-------|-----------|---------|---------------------------|
| 49.6  | 934.4872  | 0.0233  | <a href="#">DGYAQILR</a>  |
| 18.6  | 934.4906  | 0.0199  | <a href="#">DGKMSLLR</a>  |
| 12.8  | 934.5236  | -0.0131 | <a href="#">NIEKYLR</a>   |
| 11.5  | 934.4728  | 0.0377  | <a href="#">AAMMNLLR</a>  |
| 10.6  | 934.4906  | 0.0199  | <a href="#">SCTSVILR</a>  |
| 9.1   | 934.4728  | 0.0377  | <a href="#">AAMMNLLR</a>  |
| 8.2   | 934.4906  | 0.0199  | <a href="#">GTMTGLALR</a> |
| 8.0   | 934.5236  | -0.0131 | <a href="#">VEQKYLR</a>   |
| 7.8   | 934.5123  | -0.0019 | <a href="#">EEILYLR</a>   |
| 7.8   | 934.5025  | 0.0080  | <a href="#">FSLHYLR</a>   |

Mascot: <http://www.matrixscience.com/>

**Mascot Search Results**

**Peptide View**

MS/MS Fragmentation of **IEADSESQEDIIR**

Found in **P55957|BD\_HUMAN**, BH3-interacting domain death agonist OS=Homo sapiens GN=BID PE=1 SV=1

Match to Query 31634: 1503.681028 from(752.847790,2+)

Title: Locus:10.1.1.7036.2

Click mouse within plot area to zoom in by factor of two about that point

Or,  100  1500

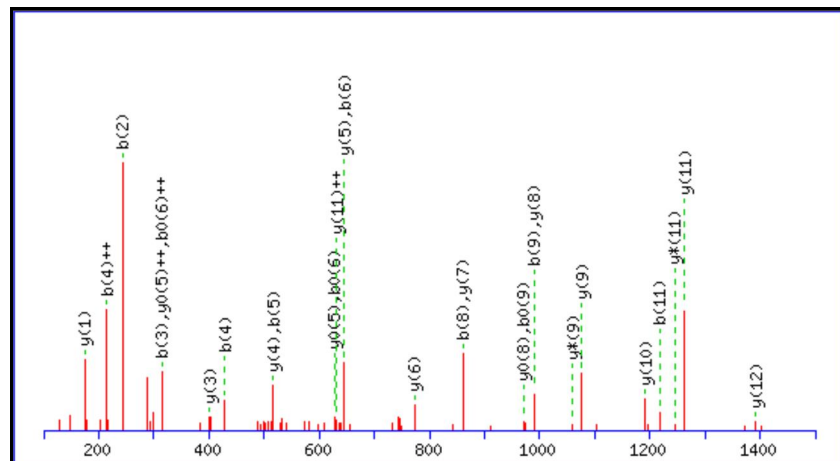

Monoisotopic mass of neutral peptide Mr(calc): 1503.7052

Fixed modifications: Carbamidomethyl (C)

Ions Score: 103 Expect: 9.9e-010

Matches (Bold Red): 29/122 fragment ions using 28 most intense peaks

| #  | b                | b <sup>++</sup> | b*        | b <sup>*++</sup> | b <sup>0</sup>  | b <sup>0++</sup> | Seq. | y                | y <sup>++</sup> | y*               | y <sup>*++</sup> | y <sup>0</sup>  | y <sup>0++</sup> | #  |
|----|------------------|-----------------|-----------|------------------|-----------------|------------------|------|------------------|-----------------|------------------|------------------|-----------------|------------------|----|
| 1  | 114.0913         | 57.5493         |           |                  |                 |                  | I    |                  |                 |                  |                  |                 |                  | 13 |
| 2  | <b>243.1339</b>  | 122.0706        |           |                  | 225.1234        | 113.0653         | E    | <b>1391.6285</b> | 696.3179        | 1374.6019        | 687.8046         | 1373.6179       | 687.3126         | 12 |
| 3  | <b>314.1710</b>  | 157.5892        |           |                  | 296.1605        | 148.5839         | A    | <b>1262.5859</b> | <b>631.7966</b> | <b>1245.5594</b> | 623.2833         | 1244.5753       | 622.7913         | 11 |
| 4  | <b>429.1980</b>  | <b>215.1026</b> |           |                  | 411.1874        | 206.0974         | D    | <b>1191.5488</b> | 596.2780        | 1174.5222        | 587.7648         | 1173.5382       | 587.2727         | 10 |
| 5  | <b>516.2300</b>  | 258.6186        |           |                  | 498.2195        | 249.6134         | S    | <b>1076.5218</b> | 538.7646        | <b>1059.4953</b> | 530.2513         | 1058.5113       | 529.7593         | 9  |
| 6  | <b>645.2726</b>  | 323.1399        |           |                  | <b>627.2620</b> | <b>314.1347</b>  | E    | <b>989.4898</b>  | 495.2485        | 972.4633         | 486.7353         | <b>971.4792</b> | 486.2433         | 8  |
| 7  | 732.3046         | 366.6560        |           |                  | 714.2941        | 357.6507         | S    | <b>860.4472</b>  | 430.7272        | 843.4207         | 422.2140         | 842.4367        | 421.7220         | 7  |
| 8  | <b>860.3632</b>  | 430.6852        | 843.3367  | 422.1720         | 842.3527        | 421.6800         | Q    | <b>773.4152</b>  | 387.2112        | 756.3886         | 378.6980         | 755.4046        | 378.2060         | 6  |
| 9  | <b>989.4058</b>  | 495.2065        | 972.3793  | 486.6933         | <b>971.3952</b> | 486.2013         | E    | <b>645.3566</b>  | 323.1819        | 628.3301         | 314.6687         | <b>627.3461</b> | <b>314.1767</b>  | 5  |
| 10 | 1104.4328        | 552.7200        | 1087.4062 | 544.2067         | 1086.4222       | 543.7147         | D    | <b>516.3140</b>  | 258.6606        | 499.2875         | 250.1474         | 498.3035        | 249.6554         | 4  |
| 11 | <b>1217.5168</b> | 609.2620        | 1200.4903 | 600.7488         | 1199.5063       | 600.2568         | I    | <b>401.2871</b>  | 201.1472        | 384.2605         | 192.6339         |                 |                  | 3  |
| 12 | 1330.6009        | 665.8041        | 1313.5743 | 657.2908         | 1312.5903       | 656.7988         | I    | 288.2030         | 144.6051        | 271.1765         | 136.0919         |                 |                  | 2  |
| 13 |                  |                 |           |                  |                 |                  | R    | <b>175.1190</b>  | 88.0631         | 158.0924         | 79.5498          |                 |                  | 1  |

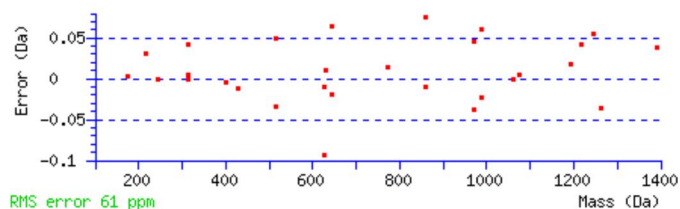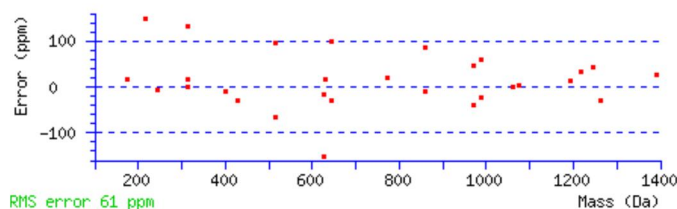

NCBI BLAST search of **IEADSESQEDIIR**

(Parameters: blastp, nr protein database, expect=20000, no filter, PAM30)

Other BLAST [web gateways](#)

All matches to this query

| Score | Mr(calc): | Delta   | Sequence                      |
|-------|-----------|---------|-------------------------------|
| 103.2 | 1503.7052 | -0.0242 | <a href="#">IEADSESQEDIIR</a> |

|      |           |         |                                |
|------|-----------|---------|--------------------------------|
| 18.6 | 1503.7239 | -0.0428 | <a href="#">LEAAETLEECALR</a>  |
| 15.6 | 1503.7239 | -0.0428 | <a href="#">ELAMKAESGPNETK</a> |
| 14.2 | 1503.7165 | -0.0354 | <a href="#">KNSGEEEIDSLQR</a>  |
| 7.8  | 1503.6446 | 0.0364  | <a href="#">ELCAGPACNEVER</a>  |
| 5.1  | 1503.7239 | -0.0429 | <a href="#">SDLIDQMNASGPIK</a> |
| 3.5  | 1503.7392 | -0.0581 | <a href="#">LEFDINICDLPR</a>   |
| 3.2  | 1503.6915 | -0.0105 | <a href="#">IYSAYMDKASDPK</a>  |
| 3.1  | 1503.7529 | -0.0719 | <a href="#">LTVSQGNTSVQQDK</a> |
| 2.1  | 1503.7464 | -0.0653 | <a href="#">NEGQRMETLTGLR</a>  |

Mascot: <http://www.matrixscience.com/>

**Mascot Search Results**

**Peptide View**

MS/MS Fragmentation of **TNQVNSGGVLLR**

Found in **P02747|C1QC\_HUMAN**, Complement C1q subcomponent subunit C OS=Homo sapiens GN=C1QC PE=1 SV=3

Match to Query 12934: 1256.650428 from(629.332490,2+)

Title: Locus:10.1.1.7000.2

Click mouse within plot area to zoom in by factor of two about that point

Or,  100  to 1200  Da

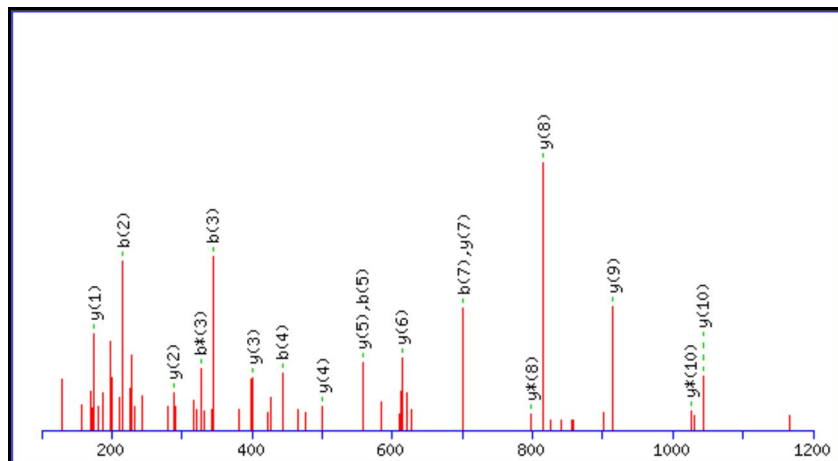

Monoisotopic mass of neutral peptide Mr(calc): 1256.6837

Fixed modifications: Carbamidomethyl (C)

Ions Score: 103 Expect: 3.7e-009

Matches (Bold Red): 18/118 fragment ions using 21 most intense peaks

| #  | b               | b <sup>++</sup> | b*              | b <sup>*++</sup> | b <sup>0</sup> | b <sup>0++</sup> | Seq. | y                | y <sup>++</sup> | y*               | y <sup>*++</sup> | y <sup>0</sup> | y <sup>0++</sup> | #  |
|----|-----------------|-----------------|-----------------|------------------|----------------|------------------|------|------------------|-----------------|------------------|------------------|----------------|------------------|----|
| 1  | 102.0550        | 51.5311         |                 |                  | 84.0444        | 42.5258          | T    |                  |                 |                  |                  |                |                  | 12 |
| 2  | <b>216.0979</b> | 108.5526        | 199.0713        | 100.0393         | 198.0873       | 99.5473          | N    | 1156.6433        | 578.8253        | 1139.6167        | 570.3120         | 1138.6327      | 569.8200         | 11 |
| 3  | <b>344.1565</b> | 172.5819        | <b>327.1299</b> | 164.0686         | 326.1459       | 163.5766         | Q    | <b>1042.6004</b> | 521.8038        | <b>1025.5738</b> | 513.2905         | 1024.5898      | 512.7985         | 10 |
| 4  | <b>443.2249</b> | 222.1161        | 426.1983        | 213.6028         | 425.2143       | 213.1108         | V    | <b>914.5418</b>  | 457.7745        | 897.5152         | 449.2613         | 896.5312       | 448.7693         | 9  |
| 5  | <b>557.2678</b> | 279.1375        | 540.2413        | 270.6243         | 539.2572       | 270.1323         | N    | <b>815.4734</b>  | 408.2403        | <b>798.4468</b>  | 399.7271         | 797.4628       | 399.2350         | 8  |
| 6  | 644.2998        | 322.6536        | 627.2733        | 314.1403         | 626.2893       | 313.6483         | S    | <b>701.4304</b>  | 351.2189        | 684.4039         | 342.7056         | 683.4199       | 342.2136         | 7  |
| 7  | <b>701.3213</b> | 351.1643        | 684.2947        | 342.6510         | 683.3107       | 342.1590         | G    | <b>614.3984</b>  | 307.7028        | 597.3719         | 299.1896         |                |                  | 6  |
| 8  | 758.3428        | 379.6750        | 741.3162        | 371.1617         | 740.3322       | 370.6697         | G    | <b>557.3770</b>  | 279.1921        | 540.3504         | 270.6788         |                |                  | 5  |
| 9  | 857.4112        | 429.2092        | 840.3846        | 420.6959         | 839.4006       | 420.2039         | V    | <b>500.3555</b>  | 250.6814        | 483.3289         | 242.1681         |                |                  | 4  |
| 10 | 970.4952        | 485.7513        | 953.4687        | 477.2380         | 952.4847       | 476.7460         | L    | <b>401.2871</b>  | 201.1472        | 384.2605         | 192.6339         |                |                  | 3  |
| 11 | 1083.5793       | 542.2933        | 1066.5528       | 533.7800         | 1065.5687      | 533.2880         | L    | <b>288.2030</b>  | 144.6051        | 271.1765         | 136.0919         |                |                  | 2  |
| 12 |                 |                 |                 |                  |                |                  | R    | <b>175.1190</b>  | 88.0631         | 158.0924         | 79.5498          |                |                  | 1  |

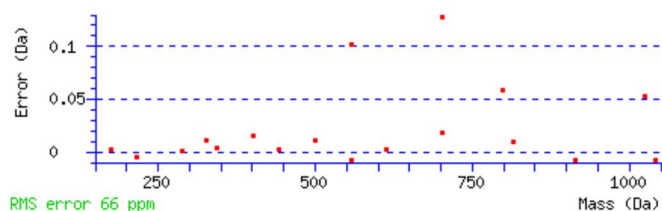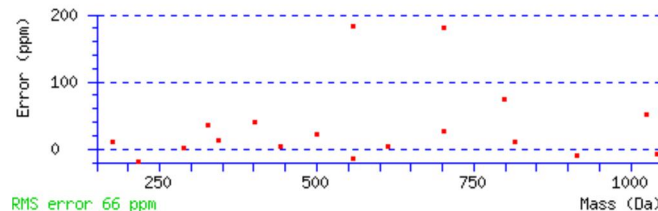

NCBI BLAST search of **TNQVNSGGVLLR**

(Parameters: blastp, nr protein database, expect=20000, no filter, PAM30)

Other BLAST [web gateways](#)

**All matches to this query**

| Score | Mr(calc): | Delta   | Sequence                        |
|-------|-----------|---------|---------------------------------|
| 103.2 | 1256.6837 | -0.0333 | <a href="#">TNQVNSGGVLLR</a>    |
| 43.7  | 1256.6586 | -0.0081 | <a href="#">ASGAGGVGGGGGKIR</a> |

|      |           |         |                              |
|------|-----------|---------|------------------------------|
| 14.5 | 1256.7023 | -0.0519 | <a href="#">QSLMKLERPR</a>   |
| 11.8 | 1256.6336 | 0.0169  | <a href="#">MLAPSGSPGVWR</a> |
| 6.9  | 1256.7088 | -0.0584 | <a href="#">DEVVKIQSLAR</a>  |
| 6.9  | 1256.6109 | 0.0395  | <a href="#">EPETNVAEGRR</a>  |
| 6.3  | 1256.6514 | -0.0009 | <a href="#">VWQTVSPVEGR</a>  |
| 6.3  | 1256.6837 | -0.0332 | <a href="#">TNQEIREIVR</a>   |
| 5.1  | 1256.6724 | -0.0220 | <a href="#">QVQEKEDLLR</a>   |
| 4.5  | 1256.5932 | 0.0573  | <a href="#">DVNNHSMTAIR</a>  |

**Mascot:** <http://www.matrixscience.com/>

# MASCOT SCIENCE Mascot Search Results

## Peptide View

MS/MS Fragmentation of **IIQFNPGPEK**

Found in **P46926|GNPII\_HUMAN**, Glucosamine-6-phosphate isomerase 1 OS=Homo sapiens GN=GNPDA1 PE=1 SV=1

Match to Query 26541: 1141.596228 from(571.805390,2+)

Title: Locus:8.1.1.6743.2

Click mouse within plot area to zoom in by factor of two about that point

Or,  to  Da

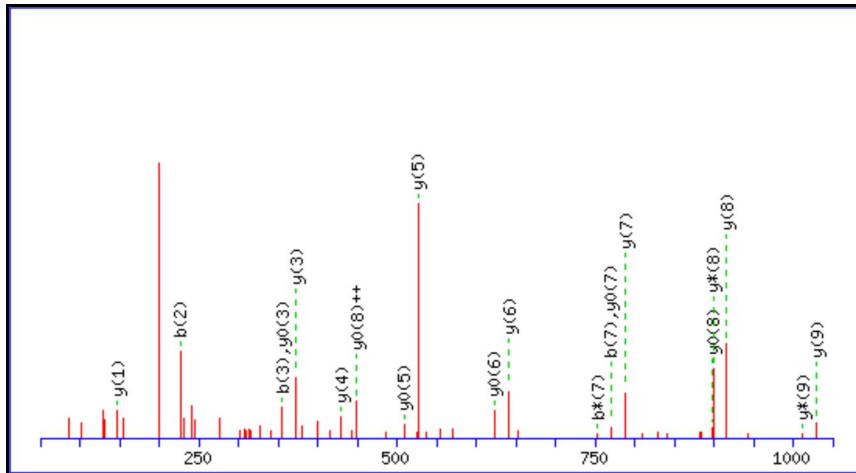

Monoisotopic mass of neutral peptide  $M_r(\text{calc})$ : 1141.6131

Fixed modifications: Carbamidomethyl (C)

Ions Score: 74 Expect: 1.5e-006

Matches (**Bold Red**): 20/86 fragment ions using 25 most intense peaks

| #  | b               | b <sup>++</sup> | b*              | b <sup>*++</sup> | b <sup>0</sup> | b <sup>0++</sup> | Seq. | y                | y <sup>++</sup> | y*               | y <sup>*++</sup> | y <sup>0</sup>  | y <sup>0++</sup> | #  |
|----|-----------------|-----------------|-----------------|------------------|----------------|------------------|------|------------------|-----------------|------------------|------------------|-----------------|------------------|----|
| 1  | 114.0913        | 57.5493         |                 |                  |                |                  | I    |                  |                 |                  |                  |                 |                  | 10 |
| 2  | <b>227.1754</b> | 114.0913        |                 |                  |                |                  | I    | <b>1029.5364</b> | 515.2718        | <b>1012.5098</b> | 506.7585         | 1011.5258       | 506.2665         | 9  |
| 3  | <b>355.2340</b> | 178.1206        | 338.2074        | 169.6074         |                |                  | Q    | <b>916.4523</b>  | 458.7298        | <b>899.4258</b>  | 450.2165         | <b>898.4417</b> | <b>449.7245</b>  | 8  |
| 4  | 502.3024        | 251.6548        | 485.2758        | 243.1416         |                |                  | F    | <b>788.3937</b>  | 394.7005        | 771.3672         | 386.1872         | <b>770.3832</b> | 385.6952         | 7  |
| 5  | 616.3453        | 308.6763        | 599.3188        | 300.1630         |                |                  | N    | <b>641.3253</b>  | 321.1663        | 624.2988         | 312.6530         | <b>623.3148</b> | 312.1610         | 6  |
| 6  | 713.3981        | 357.2027        | 696.3715        | 348.6894         |                |                  | P    | <b>527.2824</b>  | 264.1448        | 510.2558         | 255.6316         | <b>509.2718</b> | 255.1396         | 5  |
| 7  | <b>770.4196</b> | 385.7134        | <b>753.3930</b> | 377.2001         |                |                  | G    | <b>430.2296</b>  | 215.6185        | 413.2031         | 207.1052         | 412.2191        | 206.6132         | 4  |
| 8  | 867.4723        | 434.2398        | 850.4458        | 425.7265         |                |                  | P    | <b>373.2082</b>  | 187.1077        | 356.1816         | 178.5944         | <b>355.1976</b> | 178.1024         | 3  |
| 9  | 996.5149        | 498.7611        | 979.4884        | 490.2478         | 978.5043       | 489.7558         | E    | 276.1554         | 138.5813        | 259.1288         | 130.0681         | 258.1448        | 129.5761         | 2  |
| 10 |                 |                 |                 |                  |                |                  | K    | <b>147.1128</b>  | 74.0600         | 130.0863         | 65.5468          |                 |                  | 1  |

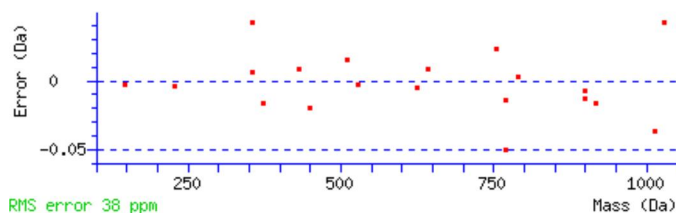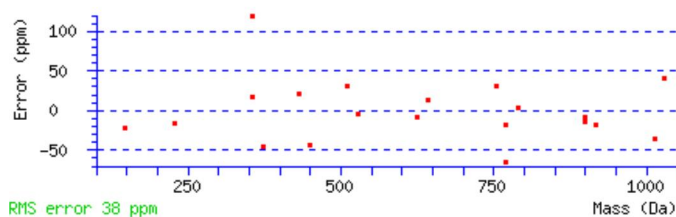

NCBI BLAST search of **IIQFNPGPEK**

(Parameters: blastp, nr protein database, expect=20000, no filter, PAM30)

Other BLAST [web gateways](#)

**All matches to this query**

| Score | Mr(calc): | Delta   | Sequence                   |
|-------|-----------|---------|----------------------------|
| 73.8  | 1141.6131 | -0.0169 | <a href="#">IIQFNPGPEK</a> |
| 28.1  | 1141.6455 | -0.0492 | <a href="#">IIQENERLK</a>  |
| 19.4  | 1141.6342 | -0.0380 | <a href="#">LIKTEHPAEK</a> |
| 19.4  | 1141.6203 | -0.0241 | <a href="#">LLQDNQRQK</a>  |
| 11.9  | 1141.6019 | -0.0057 | <a href="#">LLFSADVSYK</a> |
| 8.3   | 1141.6091 | -0.0129 | <a href="#">ILKNAESDPR</a> |
| 6.0   | 1141.6416 | -0.0454 | <a href="#">ILVEEMAPLK</a> |
| 6.0   | 1141.6416 | -0.0454 | <a href="#">LLAIMPDELK</a> |
| 5.3   | 1141.5437 | 0.0525  | <a href="#">HLMEKDPEK</a>  |
| 4.5   | 1141.6343 | -0.0381 | <a href="#">EPTLVTGLQK</a> |

**Mascot:** <http://www.matrixscience.com/>

# **MASCOT** Mascot Search Results

## Peptide View

MS/MS Fragmentation of **YPGSPGSYAAR**

Found in **Q16769|QPCT\_HUMAN**, Glutaminyl-peptide cyclotransferase OS=Homo sapiens GN=QPCT PE=1 SV=1

Match to Query 26058: 1124.514708 from(563.264630,2+)

Title: Locus:6.1.1.6100.2

Click mouse within plot area to zoom in by factor of two about that point

Or,  100 to  Da

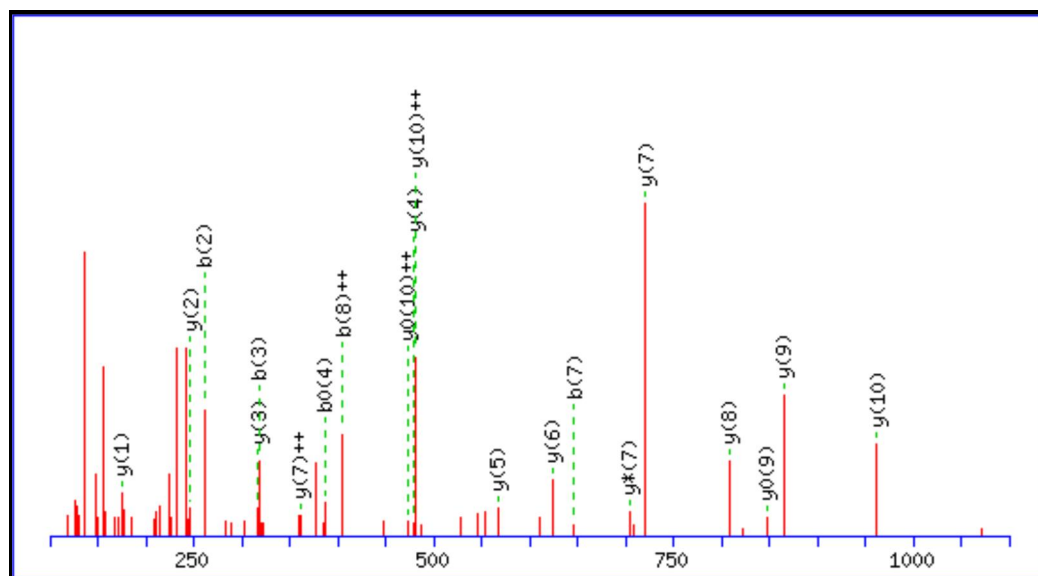

Monoisotopic mass of neutral peptide  $M_r(\text{calc})$ : 1124.5251

Fixed modifications: Carbamidomethyl (C)

Ions Score: 70 Expect: 2.4e-006

Matches (**Bold Red**): 21/86 fragment ions using 43 most intense peaks

| #  | b               | b <sup>++</sup> | b <sup>0</sup>  | b <sup>0++</sup> | Seq. | y               | y <sup>++</sup> | y*              | y <sup>*++</sup> | y <sup>0</sup>  | y <sup>0++</sup> | #  |
|----|-----------------|-----------------|-----------------|------------------|------|-----------------|-----------------|-----------------|------------------|-----------------|------------------|----|
| 1  | 164.0706        | 82.5389         |                 |                  | Y    |                 |                 |                 |                  |                 |                  | 11 |
| 2  | <b>261.1234</b> | 131.0653        |                 |                  | P    | <b>962.4690</b> | <b>481.7381</b> | 945.4425        | 473.2249         | 944.4585        | <b>472.7329</b>  | 10 |
| 3  | <b>318.1448</b> | 159.5761        |                 |                  | G    | <b>865.4163</b> | 433.2118        | 848.3897        | 424.6985         | <b>847.4057</b> | 424.2065         | 9  |
| 4  | <b>405.1769</b> | 203.0921        | <b>387.1663</b> | 194.0868         | S    | <b>808.3948</b> | 404.7010        | 791.3682        | 396.1878         | 790.3842        | 395.6958         | 8  |
| 5  | 502.2296        | 251.6185        | 484.2191        | 242.6132         | P    | <b>721.3628</b> | <b>361.1850</b> | <b>704.3362</b> | 352.6717         | 703.3522        | 352.1797         | 7  |
| 6  | 559.2511        | 280.1292        | 541.2405        | 271.1239         | G    | <b>624.3100</b> | 312.6586        | 607.2835        | 304.1454         | 606.2994        | 303.6534         | 6  |
| 7  | <b>646.2831</b> | 323.6452        | 628.2726        | 314.6399         | S    | <b>567.2885</b> | 284.1479        | 550.2620        | 275.6346         | 549.2780        | 275.1426         | 5  |
| 8  | 809.3464        | <b>405.1769</b> | 791.3359        | 396.1716         | Y    | <b>480.2565</b> | 240.6319        | 463.2300        | 232.1186         |                 |                  | 4  |
| 9  | 880.3836        | 440.6954        | 862.3730        | 431.6901         | A    | <b>317.1932</b> | 159.1002        | 300.1666        | 150.5870         |                 |                  | 3  |
| 10 | 951.4207        | 476.2140        | 933.4101        | 467.2087         | A    | <b>246.1561</b> | 123.5817        | 229.1295        | 115.0684         |                 |                  | 2  |
| 11 |                 |                 |                 |                  | R    | <b>175.1190</b> | 88.0631         | 158.0924        | 79.5498          |                 |                  | 1  |



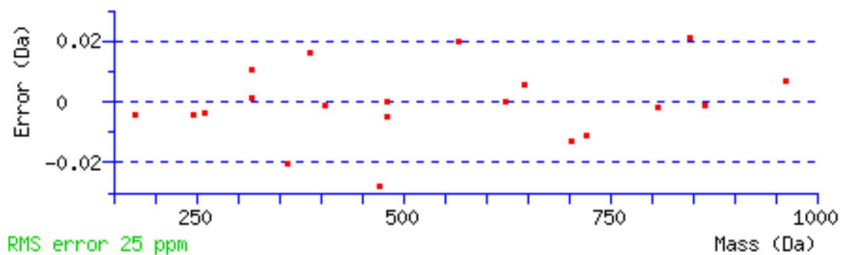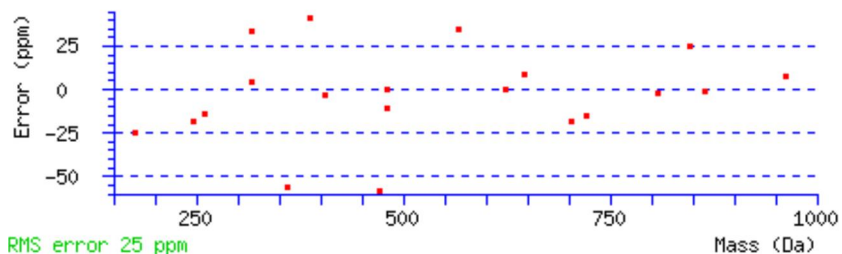

NCBI **BLAST** search of [YPGSPGSYAAR](#)

(Parameters: blastp, nr protein database, expect=20000, no filter, PAM30)

Other BLAST [web gateways](#)

**All matches to this query**

| Score | Mr(calc): | Delta   | Sequence                    |
|-------|-----------|---------|-----------------------------|
| 69.9  | 1124.5251 | -0.0103 | <a href="#">YPGSPGSYAAR</a> |
| 19.7  | 1124.5067 | 0.0081  | <a href="#">MLGSRDMGAR</a>  |
| 14.3  | 1124.5363 | -0.0216 | <a href="#">GYPSPGAHSR</a>  |
| 10.3  | 1124.5033 | 0.0114  | <a href="#">EMGSQPHSR</a>   |
| 5.3   | 1124.4808 | 0.0339  | <a href="#">YPEMDLDSR</a>   |
| 5.0   | 1124.5570 | -0.0423 | <a href="#">LMVTMLTER</a>   |
| 4.0   | 1124.5462 | -0.0315 | <a href="#">EEQVHLENK</a>   |
| 2.9   | 1124.5648 | -0.0501 | <a href="#">KLYIDSCAR</a>   |
| 2.0   | 1124.5172 | -0.0025 | <a href="#">MEAYEQVQK</a>   |
| 1.4   | 1124.5141 | 0.0007  | <a href="#">MIRDGCVMK</a>   |

**Mascot:** <http://www.matrixscience.com/>

# MASCOT SCIENCE Mascot Search Results

## Peptide View

MS/MS Fragmentation of **FAGDKGYLTK**

Found in **P60903|S10AA\_HUMAN**, Protein S100-A10 OS=Homo sapiens GN=S100A10 PE=1 SV=2

Match to Query 25371: 1098.529168 from(550.271860,2+)

Title: Locus:14.1.1.5894.3

Click mouse within plot area to zoom in by factor of two about that point

Or,   to  Da

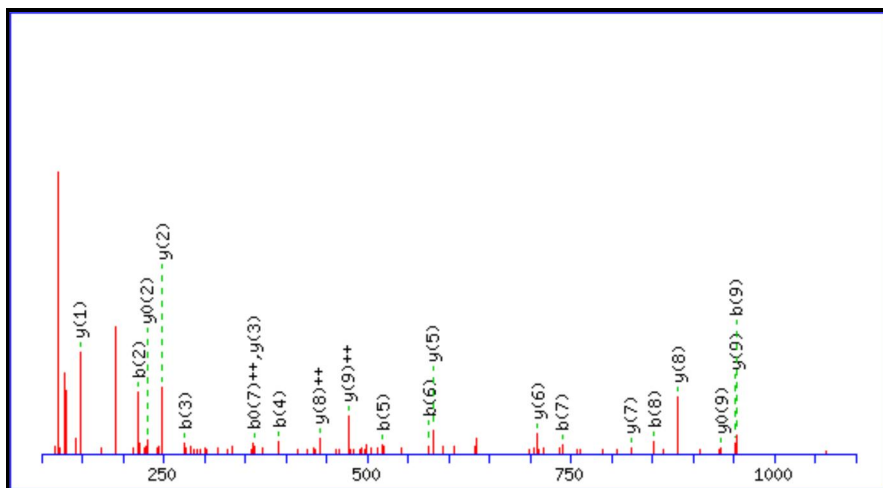

Monoisotopic mass of neutral peptide **Mr(calc):** 1098.5710

Fixed modifications: Carbamidomethyl (C)

Ions Score: 53 Expect: 0.00014

Matches (**Bold Red**): 21/92 fragment ions using 44 most intense peaks

| #  | b               | b <sup>++</sup> | b*       | b <sup>*++</sup> | b <sup>0</sup> | b <sup>0++</sup> | Seq.     | y               | y <sup>++</sup> | y*       | y <sup>*++</sup> | y <sup>0</sup>  | y <sup>0++</sup> | #         |
|----|-----------------|-----------------|----------|------------------|----------------|------------------|----------|-----------------|-----------------|----------|------------------|-----------------|------------------|-----------|
| 1  | 148.0757        | 74.5415         |          |                  |                |                  | <b>F</b> |                 |                 |          |                  |                 |                  | <b>10</b> |
| 2  | <b>219.1128</b> | 110.0600        |          |                  |                |                  | <b>A</b> | <b>952.5098</b> | <b>476.7586</b> | 935.4833 | 468.2453         | <b>934.4993</b> | 467.7533         | <b>9</b>  |
| 3  | <b>276.1343</b> | 138.5708        |          |                  |                |                  | <b>G</b> | <b>881.4727</b> | <b>441.2400</b> | 864.4462 | 432.7267         | 863.4621        | 432.2347         | <b>8</b>  |
| 4  | <b>391.1612</b> | 196.0842        |          |                  | 373.1506       | 187.0790         | <b>D</b> | <b>824.4512</b> | 412.7293        | 807.4247 | 404.2160         | 806.4407        | 403.7240         | <b>7</b>  |
| 5  | <b>519.2562</b> | 260.1317        | 502.2296 | 251.6185         | 501.2456       | 251.1264         | <b>K</b> | <b>709.4243</b> | 355.2158        | 692.3978 | 346.7025         | 691.4137        | 346.2105         | <b>6</b>  |
| 6  | <b>576.2776</b> | 288.6425        | 559.2511 | 280.1292         | 558.2671       | 279.6372         | <b>G</b> | <b>581.3293</b> | 291.1683        | 564.3028 | 282.6550         | 563.3188        | 282.1630         | <b>5</b>  |
| 7  | <b>739.3410</b> | 370.1741        | 722.3144 | 361.6608         | 721.3304       | <b>361.1688</b>  | <b>Y</b> | 524.3079        | 262.6576        | 507.2813 | 254.1443         | 506.2973        | 253.6523         | <b>4</b>  |
| 8  | <b>852.4250</b> | 426.7162        | 835.3985 | 418.2029         | 834.4145       | 417.7109         | <b>L</b> | <b>361.2445</b> | 181.1259        | 344.2180 | 172.6126         | 343.2340        | 172.1206         | <b>3</b>  |
| 9  | <b>953.4727</b> | 477.2400        | 936.4462 | 468.7267         | 935.4621       | 468.2347         | <b>T</b> | <b>248.1605</b> | 124.5839        | 231.1339 | 116.0706         | <b>230.1499</b> | 115.5786         | <b>2</b>  |
| 10 |                 |                 |          |                  |                |                  | <b>K</b> | <b>147.1128</b> | 74.0600         | 130.0863 | 65.5468          |                 |                  | <b>1</b>  |

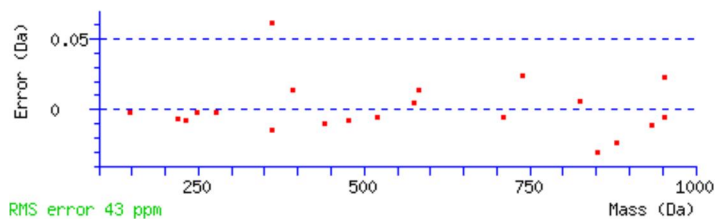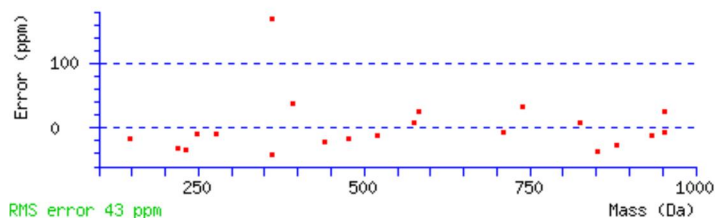

NCBI BLAST search of [FAGDKGYLTK](#)

(Parameters: blastp, nr protein database, expect=20000, no filter, PAM30)

Other BLAST [web gateways](#)

**All matches to this query**

| Score | Mr(calc): | Delta   | Sequence                    |
|-------|-----------|---------|-----------------------------|
| 52.8  | 1098.5710 | -0.0418 | <a href="#">FAGDKGYLTK</a>  |
| 21.1  | 1098.5492 | -0.0200 | <a href="#">MVSGAGISHPK</a> |
| 18.6  | 1098.4903 | 0.0389  | <a href="#">MATFEIDEK</a>   |
| 15.2  | 1098.4941 | 0.0350  | <a href="#">HEQEGKDEK</a>   |
| 8.8   | 1098.5743 | -0.0452 | <a href="#">VSGKMSTVFK</a>  |
| 7.3   | 1098.5557 | -0.0265 | <a href="#">EVNGIPVEDK</a>  |
| 6.7   | 1098.5015 | 0.0276  | <a href="#">FAQDSEMKK</a>   |
| 5.4   | 1098.5015 | 0.0276  | <a href="#">ELRMYDEK</a>    |
| 5.4   | 1098.5597 | -0.0305 | <a href="#">AFELSYLEK</a>   |
| 5.1   | 1098.5379 | -0.0088 | <a href="#">MDPLHTIEK</a>   |

Mascot: <http://www.matrixscience.com/>

# MASCOT SCIENCE Mascot Search Results

## Peptide View

MS/MS Fragmentation of **GVNTFSPEGR**

Found in **P28066|PSA5\_HUMAN**, Proteasome subunit alpha type-5 OS=Homo sapiens GN=PSMA5 PE=1 SV=3

Match to Query 24206: 1062.484188 from(532.249370,2+)

Title: Locus:9.1.1.6569.3

Click mouse within plot area to zoom in by factor of two about that point

Or,  100  950

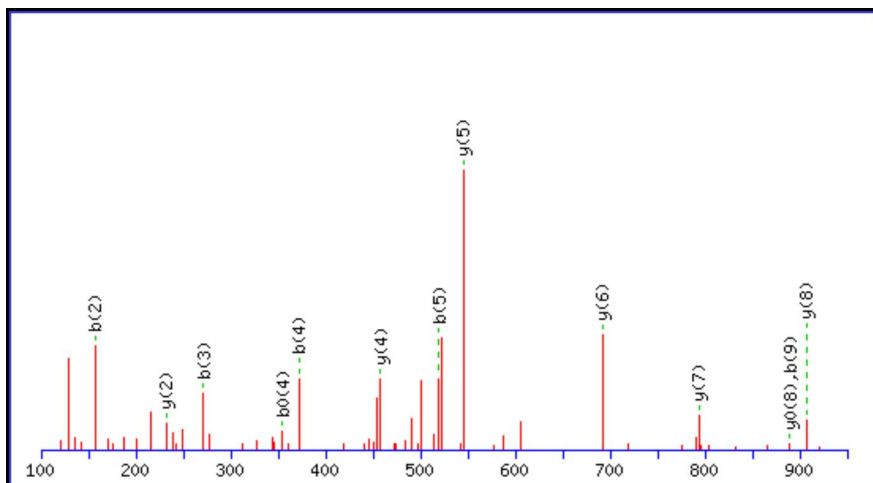

Monoisotopic mass of neutral peptide  $M_r(\text{calc})$ : 1062.5094

Fixed modifications: Carbamidomethyl (C)

Ions Score: 52 Expect: 0.00014

Matches (Bold Red): 13/94 fragment ions using 18 most intense peaks

| #  | b               | b <sup>++</sup> | b*       | b <sup>*++</sup> | b <sup>0</sup>  | b <sup>0++</sup> | Seq.     | y               | y <sup>++</sup> | y*       | y <sup>*++</sup> | y <sup>0</sup>  | y <sup>0++</sup> | #         |
|----|-----------------|-----------------|----------|------------------|-----------------|------------------|----------|-----------------|-----------------|----------|------------------|-----------------|------------------|-----------|
| 1  | 58.0287         | 29.5180         |          |                  |                 |                  | <b>G</b> |                 |                 |          |                  |                 |                  | <b>10</b> |
| 2  | <b>157.0972</b> | 79.0522         |          |                  |                 |                  | <b>V</b> | 1006.4952       | 503.7513        | 989.4687 | 495.2380         | 988.4847        | 494.7460         | <b>9</b>  |
| 3  | <b>271.1401</b> | 136.0737        | 254.1135 | 127.5604         |                 |                  | <b>N</b> | <b>907.4268</b> | 454.2170        | 890.4003 | 445.7038         | <b>889.4163</b> | 445.2118         | <b>8</b>  |
| 4  | <b>372.1878</b> | 186.5975        | 355.1612 | 178.0842         | <b>354.1772</b> | 177.5922         | <b>T</b> | <b>793.3839</b> | 397.1956        | 776.3573 | 388.6823         | 775.3733        | 388.1903         | <b>7</b>  |
| 5  | <b>519.2562</b> | 260.1317        | 502.2296 | 251.6185         | 501.2456        | 251.1264         | <b>F</b> | <b>692.3362</b> | 346.6717        | 675.3097 | 338.1585         | 674.3257        | 337.6665         | <b>6</b>  |
| 6  | 606.2882        | 303.6477        | 589.2617 | 295.1345         | 588.2776        | 294.6425         | <b>S</b> | <b>545.2678</b> | 273.1375        | 528.2413 | 264.6243         | 527.2572        | 264.1323         | <b>5</b>  |
| 7  | 703.3410        | 352.1741        | 686.3144 | 343.6608         | 685.3304        | 343.1688         | <b>P</b> | <b>458.2358</b> | 229.6215        | 441.2092 | 221.1083         | 440.2252        | 220.6162         | <b>4</b>  |
| 8  | 832.3836        | 416.6954        | 815.3570 | 408.1821         | 814.3730        | 407.6901         | <b>E</b> | 361.1830        | 181.0951        | 344.1565 | 172.5819         | 343.1724        | 172.0899         | <b>3</b>  |
| 9  | <b>889.4050</b> | 445.2061        | 872.3785 | 436.6929         | 871.3945        | 436.2009         | <b>G</b> | <b>232.1404</b> | 116.5738        | 215.1139 | 108.0606         |                 |                  | <b>2</b>  |
| 10 |                 |                 |          |                  |                 |                  | <b>R</b> | 175.1190        | 88.0631         | 158.0924 | 79.5498          |                 |                  | <b>1</b>  |

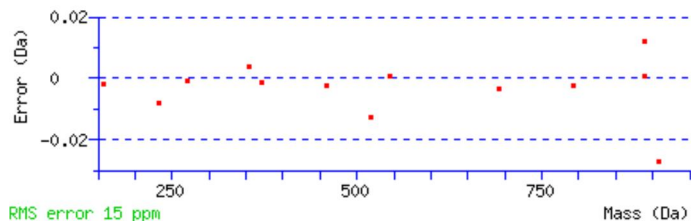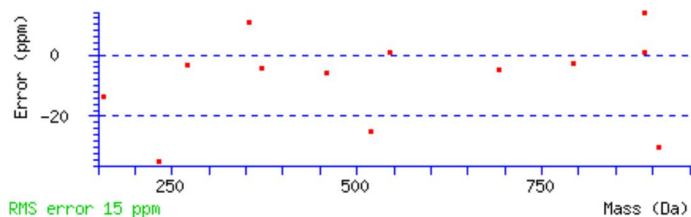

NCBI BLAST search of [GVNTFSPEGR](#)

(Parameters: blastp, nr protein database, expect=20000, no filter, PAM30)

Other BLAST [web gateways](#)

**All matches to this query**

| Score | Mr(calc): | Delta   | Sequence                    |
|-------|-----------|---------|-----------------------------|
| 52.5  | 1062.5094 | -0.0252 | <a href="#">GVNTFSPEGR</a>  |
| 20.5  | 1062.5094 | -0.0252 | <a href="#">GAKDFASDPR</a>  |
| 14.8  | 1062.5128 | -0.0286 | <a href="#">KALTEECGR</a>   |
| 14.7  | 1062.5280 | -0.0438 | <a href="#">RAAMDFFGAK</a>  |
| 14.5  | 1062.5305 | -0.0463 | <a href="#">QLSESEKSR</a>   |
| 11.4  | 1062.5128 | -0.0286 | <a href="#">NKEMEQLR</a>    |
| 10.6  | 1062.4764 | 0.0078  | <a href="#">AAMSASSEGPR</a> |
| 8.4   | 1062.4876 | -0.0034 | <a href="#">RLMQDDNR</a>    |
| 8.3   | 1062.4730 | 0.0112  | <a href="#">AKGDEDWSR</a>   |
| 5.5   | 1062.5128 | -0.0286 | <a href="#">NQELLSMGR</a>   |

**Mascot:** <http://www.matrixscience.com/>

# Mascot Search Results

## Peptide View

MS/MS Fragmentation of **LEGGSGGDSEVQR**

Found in **P62195|PR8\_HUMAN**, 26S protease regulatory subunit 8 OS=Homo sapiens GN=PSMC5 PE=1 SV=1

Match to Query 25155: 1289.583588 from(645.799070,2+)

Title: Locus:10.1.1.4947.2

Click mouse within plot area to zoom in by factor of two about that point

Or,  50  1050

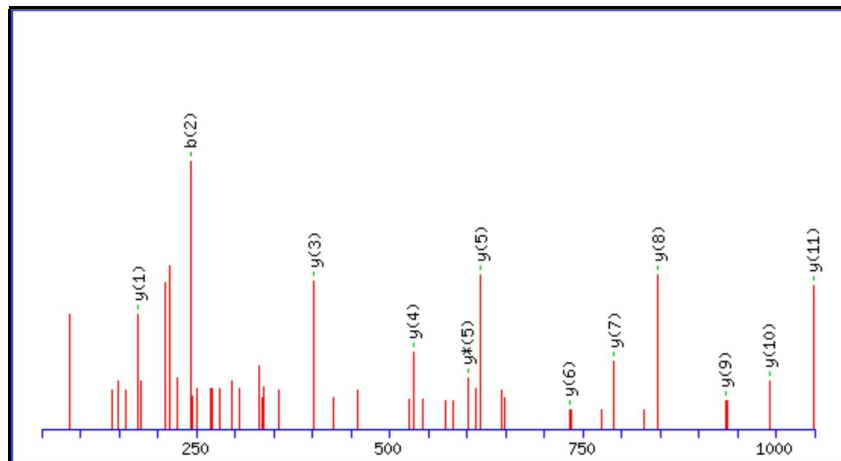

Monoisotopic mass of neutral peptide Mr(calc): 1289.5848

Fixed modifications: Carbamidomethyl (C)

Ions Score: 78 Expect: 2.9e-007

Matches (Bold Red): 12/114 fragment ions using 24 most intense peaks

| #  | b               | b <sup>++</sup> | b*        | b <sup>*++</sup> | b <sup>0</sup> | b <sup>0++</sup> | Seq. | y                | y <sup>++</sup> | y*              | y <sup>*++</sup> | y <sup>0</sup> | y <sup>0++</sup> | #  |
|----|-----------------|-----------------|-----------|------------------|----------------|------------------|------|------------------|-----------------|-----------------|------------------|----------------|------------------|----|
| 1  | 114.0913        | 57.5493         |           |                  |                |                  | L    |                  |                 |                 |                  |                |                  | 13 |
| 2  | <b>243.1339</b> | 122.0706        |           |                  | 225.1234       | 113.0653         | E    | 1177.5080        | 589.2576        | 1160.4814       | 580.7444         | 1159.4974      | 580.2523         | 12 |
| 3  | 300.1554        | 150.5813        |           |                  | 282.1448       | 141.5761         | G    | <b>1048.4654</b> | 524.7363        | 1031.4388       | 516.2231         | 1030.4548      | 515.7311         | 11 |
| 4  | 357.1769        | 179.0921        |           |                  | 339.1663       | 170.0868         | G    | <b>991.4439</b>  | 496.2256        | 974.4174        | 487.7123         | 973.4334       | 487.2203         | 10 |
| 5  | 444.2089        | 222.6081        |           |                  | 426.1983       | 213.6028         | S    | <b>934.4225</b>  | 467.7149        | 917.3959        | 459.2016         | 916.4119       | 458.7096         | 9  |
| 6  | 501.2304        | 251.1188        |           |                  | 483.2198       | 242.1135         | G    | <b>847.3904</b>  | 424.1989        | 830.3639        | 415.6856         | 829.3799       | 415.1936         | 8  |
| 7  | 558.2518        | 279.6295        |           |                  | 540.2413       | 270.6243         | G    | <b>790.3690</b>  | 395.6881        | 773.3424        | 387.1748         | 772.3584       | 386.6828         | 7  |
| 8  | 673.2788        | 337.1430        |           |                  | 655.2682       | 328.1377         | D    | <b>733.3475</b>  | 367.1774        | 716.3210        | 358.6641         | 715.3369       | 358.1721         | 6  |
| 9  | 760.3108        | 380.6590        |           |                  | 742.3002       | 371.6537         | S    | <b>618.3206</b>  | 309.6639        | <b>601.2940</b> | 301.1506         | 600.3100       | 300.6586         | 5  |
| 10 | 889.3534        | 445.1803        |           |                  | 871.3428       | 436.1750         | E    | <b>531.2885</b>  | 266.1479        | 514.2620        | 257.6346         | 513.2780       | 257.1426         | 4  |
| 11 | 988.4218        | 494.7145        |           |                  | 970.4112       | 485.7093         | V    | <b>402.2459</b>  | 201.6266        | 385.2194        | 193.1133         |                |                  | 3  |
| 12 | 1116.4804       | 558.7438        | 1099.4538 | 550.2305         | 1098.4698      | 549.7385         | Q    | 303.1775         | 152.0924        | 286.1510        | 143.5791         |                |                  | 2  |
| 13 |                 |                 |           |                  |                |                  | R    | <b>175.1190</b>  | 88.0631         | 158.0924        | 79.5498          |                |                  | 1  |

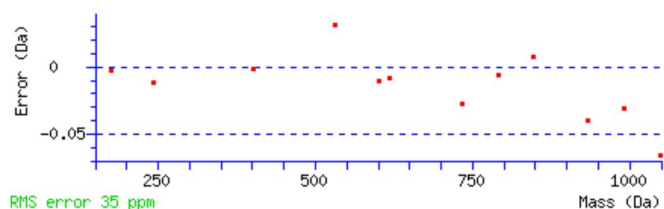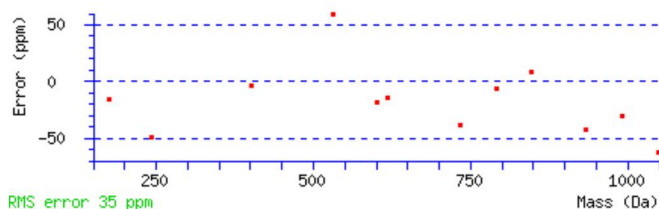

NCBI BLAST search of **LEGGSGGDSEVQR**

(Parameters: blastp, nr protein database, expect=20000, no filter, PAM30)

Other BLAST [web gateways](#)

All matches to this query

| Score | Mr(calc): | Delta   | Sequence             |
|-------|-----------|---------|----------------------|
| 78.0  | 1289.5848 | -0.0012 | <b>LEGGSGGDSEVQR</b> |

|      |           |         |                              |
|------|-----------|---------|------------------------------|
| 10.5 | 1289.6397 | -0.0562 | <a href="#">ELLEQMERAR</a>   |
| 0.2  | 1289.6398 | -0.0562 | <a href="#">KNIDALSGMEGR</a> |

**Mascot:** <http://www.matrixscience.com/>

# MASCOT SCIENCE Mascot Search Results

## Peptide View

MS/MS Fragmentation of **LTEQAVQAINK**

Found in **Q9BRF8|CPPED\_HUMAN**, Calcineurin-like phosphoesterase domain-containing protein 1 OS=Homo sapiens GN=CPPED1 PE=1 SV=3

Match to Query 24134: 1213.655728 from(607.835140,2+)

Title: Locus:11.1.1.5300.2

Click mouse within plot area to zoom in by factor of two about that point

Or,  to  Da

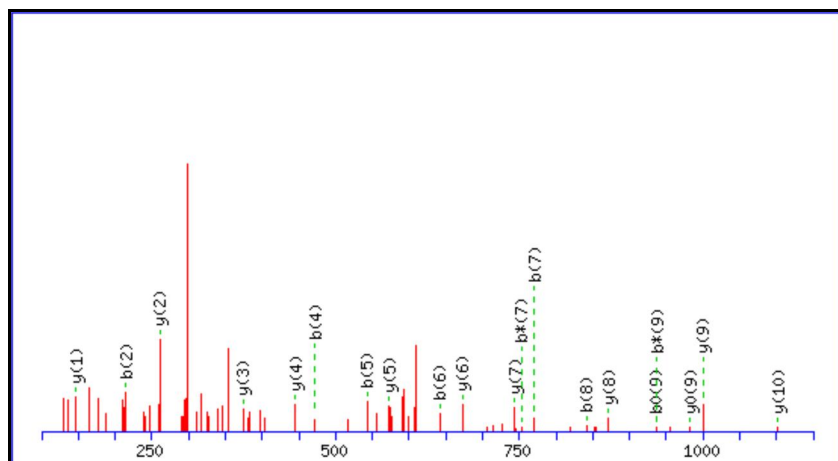

Monoisotopic mass of neutral peptide  $M_r(\text{calc})$ : 1213.6666

Fixed modifications: Carbamidomethyl (C)

Ions Score: 59 Expect: 4.3e-005

Matches (Bold Red): 20/96 fragment ions using 49 most intense peaks

| #  | b               | b <sup>++</sup> | b*              | b <sup>*++</sup> | b <sup>0</sup>  | b <sup>0++</sup> | Seq. | y                | y <sup>++</sup> | y*        | y <sup>*++</sup> | y <sup>0</sup>  | y <sup>0++</sup> | #  |
|----|-----------------|-----------------|-----------------|------------------|-----------------|------------------|------|------------------|-----------------|-----------|------------------|-----------------|------------------|----|
| 1  | 114.0913        | 57.5493         |                 |                  |                 |                  | L    |                  |                 |           |                  |                 |                  | 11 |
| 2  | <b>215.1390</b> | 108.0731        |                 |                  | 197.1285        | 99.0679          | T    | <b>1101.5899</b> | 551.2986        | 1084.5633 | 542.7853         | 1083.5793       | 542.2933         | 10 |
| 3  | 344.1816        | 172.5944        |                 |                  | 326.1710        | 163.5892         | E    | <b>1000.5422</b> | 500.7747        | 983.5156  | 492.2615         | <b>982.5316</b> | 491.7694         | 9  |
| 4  | <b>472.2402</b> | 236.6237        | 455.2136        | 228.1105         | 454.2296        | 227.6185         | Q    | <b>871.4996</b>  | 436.2534        | 854.4730  | 427.7402         |                 |                  | 8  |
| 5  | <b>543.2773</b> | 272.1423        | 526.2508        | 263.6290         | 525.2667        | 263.1370         | A    | <b>743.4410</b>  | 372.2241        | 726.4145  | 363.7109         |                 |                  | 7  |
| 6  | <b>642.3457</b> | 321.6765        | 625.3192        | 313.1632         | 624.3352        | 312.6712         | V    | <b>672.4039</b>  | 336.7056        | 655.3774  | 328.1923         |                 |                  | 6  |
| 7  | <b>770.4043</b> | 385.7058        | <b>753.3777</b> | 377.1925         | 752.3937        | 376.7005         | Q    | <b>573.3355</b>  | 287.1714        | 556.3089  | 278.6581         |                 |                  | 5  |
| 8  | <b>841.4414</b> | 421.2243        | 824.4149        | 412.7111         | 823.4308        | 412.2191         | A    | <b>445.2769</b>  | 223.1421        | 428.2504  | 214.6288         |                 |                  | 4  |
| 9  | 954.5255        | 477.7664        | <b>937.4989</b> | 469.2531         | <b>936.5149</b> | 468.7611         | I    | <b>374.2398</b>  | 187.6235        | 357.2132  | 179.1103         |                 |                  | 3  |
| 10 | 1068.5684       | 534.7878        | 1051.5419       | 526.2746         | 1050.5578       | 525.7826         | N    | <b>261.1557</b>  | 131.0815        | 244.1292  | 122.5682         |                 |                  | 2  |
| 11 |                 |                 |                 |                  |                 |                  | K    | <b>147.1128</b>  | 74.0600         | 130.0863  | 65.5468          |                 |                  | 1  |

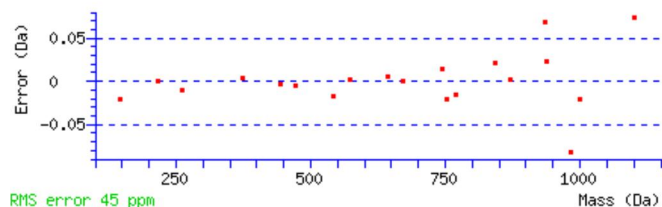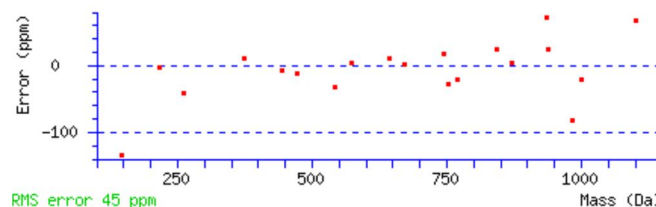

NCBI BLAST search of [LTEQAVQAINK](#)

(Parameters: blastp, nr protein database, expect=20000, no filter, PAM30)

Other BLAST [web gateways](#)

### All matches to this query

| Score | $M_r(\text{calc})$ | Delta   | Sequence                    |
|-------|--------------------|---------|-----------------------------|
| 58.9  | 1213.6666          | -0.0109 | <a href="#">LTEQAVQAINK</a> |
| 5.5   | 1213.7005          | -0.0448 | <a href="#">LLFNALKHMK</a>  |



|     |           |         |                             |
|-----|-----------|---------|-----------------------------|
| 5.4 | 1213.7030 | -0.0473 | <a href="#">ITDDQLKILR</a>  |
| 3.6 | 1213.6778 | -0.0221 | <a href="#">LQAEISQAARK</a> |
| 3.4 | 1213.6051 | 0.0506  | <a href="#">LTNSRHGETTV</a> |
| 2.7 | 1213.6051 | 0.0506  | <a href="#">QEPNGNSKVNK</a> |
| 0.0 | 1213.6666 | -0.0109 | <a href="#">LQQKVELNK</a>   |

**Mascot:** <http://www.matrixscience.com/>

**MATRIX SCIENCE Mascot Search Results**

**Peptide View**

MS/MS Fragmentation of **YTACLCDNPK**

Found in **P12273|PIP\_HUMAN**, Prolactin-inducible protein OS=Homo sapiens GN=PIP PE=1 SV=1

Match to Query 26108: 1355.557268 from(678.785910,2+)

Title: Locus:13.1.1.4919.2

Click mouse within plot area to zoom in by factor of two about that point

Or,  100  1200

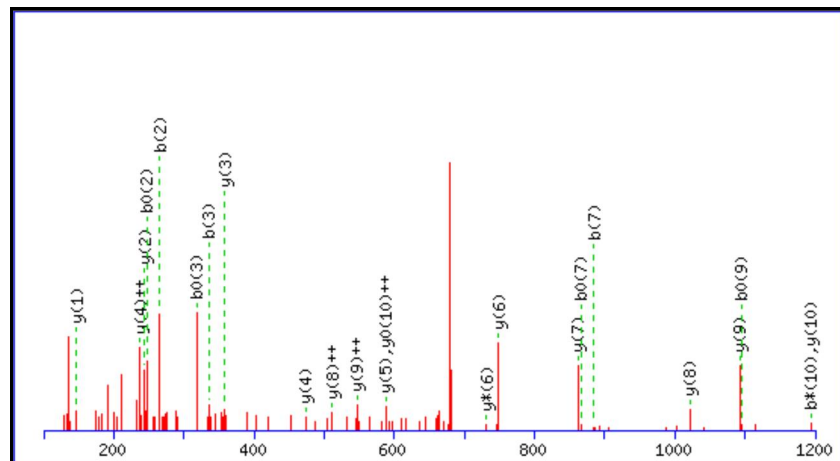

Monoisotopic mass of neutral peptide Mr(calc): 1355.5486

Fixed modifications: Carbamidomethyl (C)

Ions Score: 56 Expect: 2e-005

Matches (Bold Red): 23/96 fragment ions using 51 most intense peaks

| #  | b               | b <sup>++</sup> | b*               | b <sup>*++</sup> | b <sup>0</sup>   | b <sup>0++</sup> | Seq. | y                | y <sup>++</sup> | y*              | y <sup>*++</sup> | y <sup>0</sup> | y <sup>0++</sup> | #  |
|----|-----------------|-----------------|------------------|------------------|------------------|------------------|------|------------------|-----------------|-----------------|------------------|----------------|------------------|----|
| 1  | 164.0706        | 82.5389         |                  |                  |                  |                  | Y    |                  |                 |                 |                  |                |                  | 11 |
| 2  | <b>265.1183</b> | 133.0628        |                  |                  | <b>247.1077</b>  | 124.0575         | T    | <b>1193.4925</b> | 597.2499        | 1176.4660       | 588.7366         | 1175.4820      | <b>588.2446</b>  | 10 |
| 3  | <b>336.1554</b> | 168.5813        |                  |                  | <b>318.1448</b>  | 159.5761         | A    | <b>1092.4449</b> | <b>546.7261</b> | 1075.4183       | 538.2128         | 1074.4343      | 537.7208         | 9  |
| 4  | 496.1860        | 248.5967        |                  |                  | 478.1755         | 239.5914         | C    | <b>1021.4077</b> | <b>511.2075</b> | 1004.3812       | 502.6942         | 1003.3972      | 502.2022         | 8  |
| 5  | 609.2701        | 305.1387        |                  |                  | 591.2595         | 296.1334         | L    | <b>861.3771</b>  | 431.1922        | 844.3505        | 422.6789         | 843.3665       | 422.1869         | 7  |
| 6  | 769.3008        | 385.1540        |                  |                  | 751.2902         | 376.1487         | C    | <b>748.2930</b>  | 374.6502        | <b>731.2665</b> | 366.1369         | 730.2825       | 365.6449         | 6  |
| 7  | <b>884.3277</b> | 442.6675        |                  |                  | <b>866.3171</b>  | 433.6622         | D    | <b>588.2624</b>  | 294.6348        | 571.2358        | 286.1216         | 570.2518       | 285.6295         | 5  |
| 8  | 999.3546        | 500.1810        |                  |                  | 981.3441         | 491.1757         | D    | <b>473.2354</b>  | <b>237.1214</b> | 456.2089        | 228.6081         | 455.2249       | 228.1161         | 4  |
| 9  | 1113.3976       | 557.2024        | 1096.3710        | 548.6892         | <b>1095.3870</b> | 548.1971         | N    | <b>358.2085</b>  | 179.6079        | 341.1819        | 171.0946         |                |                  | 3  |
| 10 | 1210.4503       | 605.7288        | <b>1193.4238</b> | 597.2155         | 1192.4398        | 596.7235         | P    | <b>244.1656</b>  | 122.5864        | 227.1390        | 114.0731         |                |                  | 2  |
| 11 |                 |                 |                  |                  |                  |                  | K    | <b>147.1128</b>  | 74.0600         | 130.0863        | 65.5468          |                |                  | 1  |

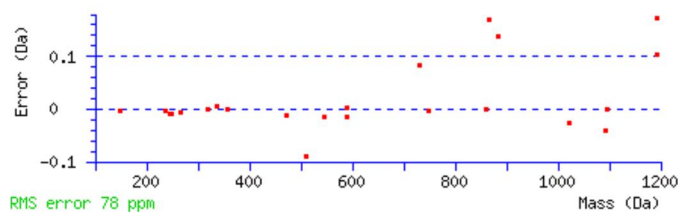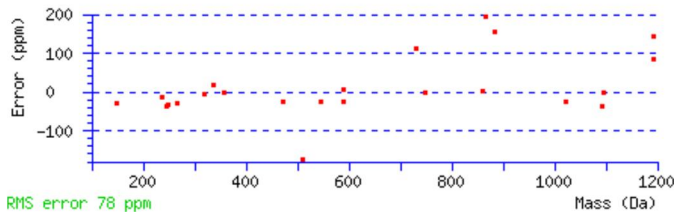

NCBI BLAST search of **YTACLCDNPK**

(Parameters: blastp, nr protein database, expect=20000, no filter, PAM30)

Other BLAST [web gateways](#)

**All matches to this query**

| Score | Mr(calc): | Delta  | Sequence                   |
|-------|-----------|--------|----------------------------|
| 56.2  | 1355.5486 | 0.0087 | <a href="#">YTACLCDNPK</a> |

Mascot: <http://www.matrixscience.com/>

# MASCOT SCIENCE Mascot Search Results

## Peptide View

MS/MS Fragmentation of **LVGGPMDASVEEEGV**

Found in **P01034|CYTC\_HUMAN**, Cystatin-C OS=Homo sapiens GN=CST3 PE=1 SV=1

Match to Query 28165: 1643.777268 from(822.895910,2+)

Title: Locus:14.1.1.5320.3

Click mouse within plot area to zoom in by factor of two about that point

Or,  0 to  Da

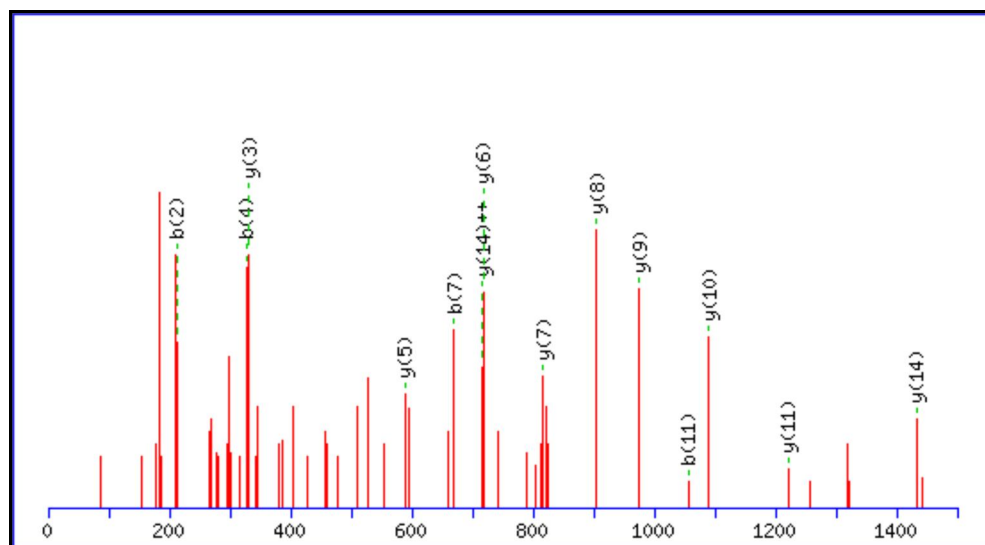

Monoisotopic mass of neutral peptide  $M_r(\text{calc})$ : 1643.7825

Fixed modifications: Carbamidomethyl (C)

Ions Score: 54 Expect: 0.0001

Matches (**Bold Red**): 14/132 fragment ions using 26 most intense peaks

| #  | b                | b <sup>++</sup> | b <sup>0</sup> | b <sup>0++</sup> | Seq. | y                | y <sup>++</sup> | y*        | y* <sup>++</sup> | y <sup>0</sup> | y <sup>0++</sup> | #  |
|----|------------------|-----------------|----------------|------------------|------|------------------|-----------------|-----------|------------------|----------------|------------------|----|
| 1  | 114.0913         | 57.5493         |                |                  | L    |                  |                 |           |                  |                |                  | 16 |
| 2  | <b>213.1598</b>  | 107.0835        |                |                  | V    | 1531.7057        | 766.3565        | 1514.6792 | 757.8432         | 1513.6951      | 757.3512         | 15 |
| 3  | 270.1812         | 135.5942        |                |                  | G    | <b>1432.6373</b> | <b>716.8223</b> | 1415.6107 | 708.3090         | 1414.6267      | 707.8170         | 14 |
| 4  | <b>327.2027</b>  | 164.1050        |                |                  | G    | 1375.6158        | 688.3115        | 1358.5893 | 679.7983         | 1357.6053      | 679.3063         | 13 |
| 5  | 424.2554         | 212.6314        |                |                  | P    | 1318.5944        | 659.8008        | 1301.5678 | 651.2875         | 1300.5838      | 650.7955         | 12 |
| 6  | 555.2959         | 278.1516        |                |                  | M    | <b>1221.5416</b> | 611.2744        | 1204.5150 | 602.7612         | 1203.5310      | 602.2692         | 11 |
| 7  | <b>670.3229</b>  | 335.6651        | 652.3123       | 326.6598         | D    | <b>1090.5011</b> | 545.7542        | 1073.4746 | 537.2409         | 1072.4905      | 536.7489         | 10 |
| 8  | 741.3600         | 371.1836        | 723.3494       | 362.1783         | A    | <b>975.4742</b>  | 488.2407        | 958.4476  | 479.7274         | 957.4636       | 479.2354         | 9  |
| 9  | 828.3920         | 414.6996        | 810.3815       | 405.6944         | S    | <b>904.4371</b>  | 452.7222        | 887.4105  | 444.2089         | 886.4265       | 443.7169         | 8  |
| 10 | 927.4604         | 464.2339        | 909.4499       | 455.2286         | V    | <b>817.4050</b>  | 409.2061        | 800.3785  | 400.6929         | 799.3945       | 400.2009         | 7  |
| 11 | <b>1056.5030</b> | 528.7551        | 1038.4925      | 519.7499         | E    | <b>718.3366</b>  | 359.6719        | 701.3101  | 351.1587         | 700.3260       | 350.6667         | 6  |
| 12 | 1185.5456        | 593.2764        | 1167.5351      | 584.2712         | E    | <b>589.2940</b>  | 295.1506        | 572.2675  | 286.6374         | 571.2835       | 286.1454         | 5  |
| 13 | 1314.5882        | 657.7977        | 1296.5776      | 648.7925         | E    | 460.2514         | 230.6293        | 443.2249  | 222.1161         | 442.2409       | 221.6241         | 4  |
| 14 | 1371.6097        | 686.3085        | 1353.5991      | 677.3032         | G    | <b>331.2088</b>  | 166.1081        | 314.1823  | 157.5948         |                |                  | 3  |
| 15 | 1470.6781        | 735.8427        | 1452.6675      | 726.8374         | V    | 274.1874         | 137.5973        | 257.1608  | 129.0840         |                |                  | 2  |
| 16 |                  |                 |                |                  | R    | 175.1190         | 88.0631         | 158.0924  | 79.5498          |                |                  | 1  |

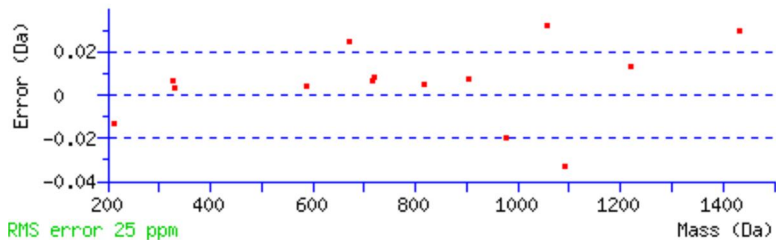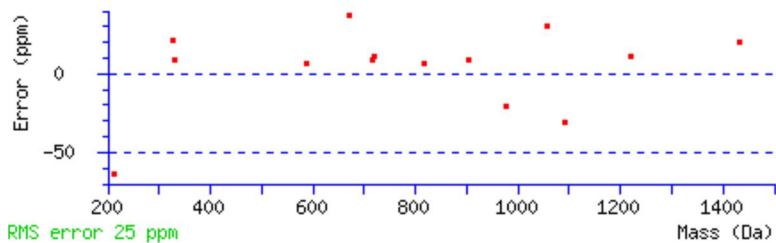

NCBI **BLAST** search of [LVGGPMDASVEEEGV](#)

(Parameters: blastp, nr protein database, expect=20000, no filter, PAM30)

Other BLAST [web gateways](#)

**All matches to this query**

| Score | Mr(calc): | Delta   | Sequence                        |
|-------|-----------|---------|---------------------------------|
| 53.7  | 1643.7825 | -0.0052 | <a href="#">LVGGPMDASVEEEGV</a> |

**Mascot:** <http://www.matrixscience.com/>

# Mascot Search Results

## Peptide View

MS/MS Fragmentation of **IEADSESQEDIIR**

Found in **P55957|BD\_HUMAN**, BH3-interacting domain death agonist OS=Homo sapiens GN=BID PE=1 SV=1

Match to Query 25637: 1503.713468 from(752.864010,2+)

Title: Locus:14.1.1.5184.3

Click mouse within plot area to zoom in by factor of two about that point

Or,  to  Da

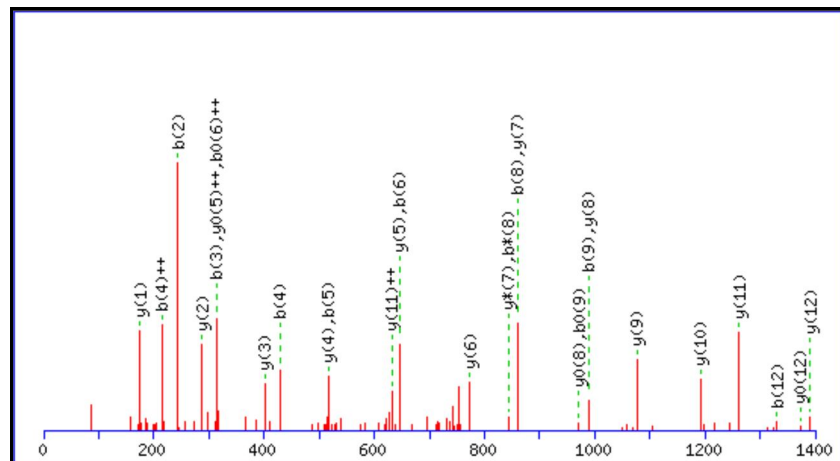

Monoisotopic mass of neutral peptide Mr(calc): 1503.7052

Fixed modifications: Carbamidomethyl (C)

Ions Score: 117 Expect: 5.4e-011

Matches (Bold Red): 29/122 fragment ions using 25 most intense peaks

| #  | b                | b <sup>++</sup> | b*              | b <sup>*++</sup> | b <sup>0</sup>  | b <sup>0++</sup> | Seq.     | y                | y <sup>++</sup> | y*              | y <sup>*++</sup> | y <sup>0</sup>   | y <sup>0++</sup> | #         |
|----|------------------|-----------------|-----------------|------------------|-----------------|------------------|----------|------------------|-----------------|-----------------|------------------|------------------|------------------|-----------|
| 1  | 114.0913         | 57.5493         |                 |                  |                 |                  | <b>I</b> |                  |                 |                 |                  |                  |                  | <b>13</b> |
| 2  | <b>243.1339</b>  | 122.0706        |                 |                  | 225.1234        | 113.0653         | <b>E</b> | <b>1391.6285</b> | 696.3179        | 1374.6019       | 687.8046         | <b>1373.6179</b> | 687.3126         | <b>12</b> |
| 3  | <b>314.1710</b>  | 157.5892        |                 |                  | 296.1605        | 148.5839         | <b>A</b> | <b>1262.5859</b> | <b>631.7966</b> | 1245.5594       | 623.2833         | 1244.5753        | 622.7913         | <b>11</b> |
| 4  | <b>429.1980</b>  | <b>215.1026</b> |                 |                  | 411.1874        | 206.0974         | <b>D</b> | <b>1191.5488</b> | 596.2780        | 1174.5222       | 587.7648         | 1173.5382        | 587.2727         | <b>10</b> |
| 5  | <b>516.2300</b>  | 258.6186        |                 |                  | 498.2195        | 249.6134         | <b>S</b> | <b>1076.5218</b> | 538.7646        | 1059.4953       | 530.2513         | 1058.5113        | 529.7593         | <b>9</b>  |
| 6  | <b>645.2726</b>  | 323.1399        |                 |                  | 627.2620        | <b>314.1347</b>  | <b>E</b> | <b>989.4898</b>  | 495.2485        | 972.4633        | 486.7353         | <b>971.4792</b>  | 486.2433         | <b>8</b>  |
| 7  | 732.3046         | 366.6560        |                 |                  | 714.2941        | 357.6507         | <b>S</b> | <b>860.4472</b>  | 430.7272        | <b>843.4207</b> | 422.2140         | 842.4367         | 421.7220         | <b>7</b>  |
| 8  | <b>860.3632</b>  | 430.6852        | <b>843.3367</b> | 422.1720         | 842.3527        | 421.6800         | <b>Q</b> | <b>773.4152</b>  | 387.2112        | 756.3886        | 378.6980         | 755.4046         | 378.2060         | <b>6</b>  |
| 9  | <b>989.4058</b>  | 495.2065        | 972.3793        | 486.6933         | <b>971.3952</b> | 486.2013         | <b>E</b> | <b>645.3566</b>  | 323.1819        | 628.3301        | 314.6687         | 627.3461         | <b>314.1767</b>  | <b>5</b>  |
| 10 | 1104.4328        | 552.7200        | 1087.4062       | 544.2067         | 1086.4222       | 543.7147         | <b>D</b> | <b>516.3140</b>  | 258.6606        | 499.2875        | 250.1474         | 498.3035         | 249.6554         | <b>4</b>  |
| 11 | 1217.5168        | 609.2620        | 1200.4903       | 600.7488         | 1199.5063       | 600.2568         | <b>I</b> | <b>401.2871</b>  | 201.1472        | 384.2605        | 192.6339         |                  |                  | <b>3</b>  |
| 12 | <b>1330.6009</b> | 665.8041        | 1313.5743       | 657.2908         | 1312.5903       | 656.7988         | <b>I</b> | <b>288.2030</b>  | 144.6051        | 271.1765        | 136.0919         |                  |                  | <b>2</b>  |
| 13 |                  |                 |                 |                  |                 |                  | <b>R</b> | <b>175.1190</b>  | 88.0631         | 158.0924        | 79.5498          |                  |                  | <b>1</b>  |

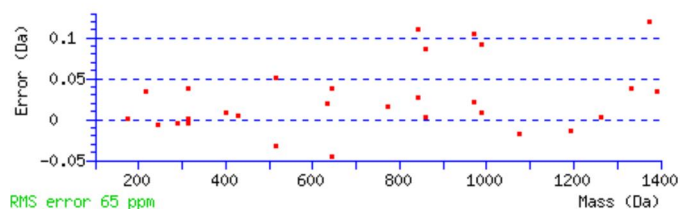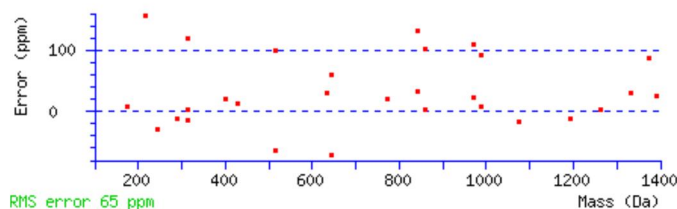

NCBI BLAST search of **IEADSESQEDIIR**

(Parameters: blastp, nr protein database, expect=20000, no filter, PAM30)

Other BLAST [web gateways](#)

All matches to this query

| Score | Mr(calc): | Delta  | Sequence                      |
|-------|-----------|--------|-------------------------------|
| 117.2 | 1503.7052 | 0.0082 | <a href="#">IEADSESQEDIIR</a> |

|      |           |         |                                |
|------|-----------|---------|--------------------------------|
| 21.3 | 1503.7165 | -0.0030 | <a href="#">KNSGEEEEIDSLQR</a> |
| 19.7 | 1503.7239 | -0.0104 | <a href="#">LEAAETLEECALR</a>  |
| 16.2 | 1503.7794 | -0.0659 | <a href="#">GESLFQGRGGLDLR</a> |
| 15.4 | 1503.7239 | -0.0104 | <a href="#">ELAMKAESGPNETK</a> |
| 14.2 | 1503.7392 | -0.0257 | <a href="#">LEFDINICDLPR</a>   |
| 10.3 | 1503.6624 | 0.0511  | <a href="#">GDCDPEVSAALQSR</a> |
| 9.4  | 1503.7681 | -0.0546 | <a href="#">ESPDYERIINLR</a>   |
| 7.9  | 1503.7603 | -0.0468 | <a href="#">LETLIEVSVECGR</a>  |
| 7.9  | 1503.6446 | 0.0689  | <a href="#">ELCAGPACNEVER</a>  |

Mascot: <http://www.matrixscience.com/>

# Mascot Search Results

## Peptide View

MS/MS Fragmentation of **QVCADPSEEWWQK**

Found in **P10147|CCL3\_HUMAN**, C-C motif chemokine 3 OS=Homo sapiens GN=CCL3 PE=1 SV=1

Match to Query 26063: 1574.713228 from(788.363890,2+)

Title: Locus:16.1.1.5061.2

Click mouse within plot area to zoom in by factor of two about that point

Or,  100  1400

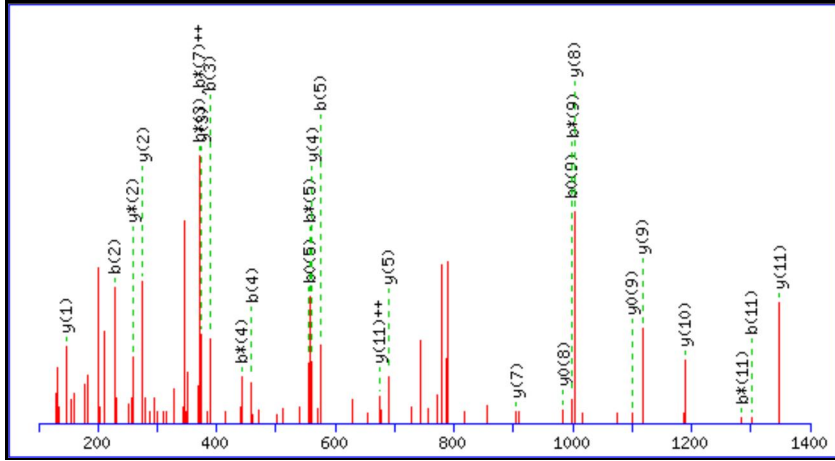

Monoisotopic mass of neutral peptide  $M_r(\text{calc})$ : 1574.7035

Fixed modifications: Carbamidomethyl (C)

Ions Score: 66 Expect: 5.3e-006

Matches (**Bold Red**): 27/128 fragment ions using 46 most intense peaks

| #  | b                | b <sup>++</sup> | b*               | b <sup>*++</sup> | b <sup>0</sup>  | b <sup>0++</sup> | Seq.     | y                | y <sup>++</sup> | y*              | y <sup>*++</sup> | y <sup>0</sup>   | y <sup>0++</sup> | #         |
|----|------------------|-----------------|------------------|------------------|-----------------|------------------|----------|------------------|-----------------|-----------------|------------------|------------------|------------------|-----------|
| 1  | 129.0659         | 65.0366         | 112.0393         | 56.5233          |                 |                  | <b>Q</b> |                  |                 |                 |                  |                  |                  | <b>13</b> |
| 2  | <b>228.1343</b>  | 114.5708        | 211.1077         | 106.0575         |                 |                  | <b>V</b> | 1447.6522        | 724.3297        | 1430.6257       | 715.8165         | 1429.6416        | 715.3245         | <b>12</b> |
| 3  | <b>388.1649</b>  | 194.5861        | <b>371.1384</b>  | 186.0728         |                 |                  | <b>C</b> | <b>1348.5838</b> | <b>674.7955</b> | 1331.5572       | 666.2823         | 1330.5732        | 665.7903         | <b>11</b> |
| 4  | <b>459.2020</b>  | 230.1047        | <b>442.1755</b>  | 221.5914         |                 |                  | <b>A</b> | <b>1188.5531</b> | 594.7802        | 1171.5266       | 586.2669         | 1170.5426        | 585.7749         | <b>10</b> |
| 5  | <b>574.2290</b>  | 287.6181        | <b>557.2024</b>  | 279.1049         | <b>556.2184</b> | 278.6128         | <b>D</b> | <b>1117.5160</b> | 559.2617        | 1100.4895       | 550.7484         | <b>1099.5055</b> | 550.2564         | <b>9</b>  |
| 6  | 671.2817         | 336.1445        | 654.2552         | 327.6312         | 653.2712        | 327.1392         | <b>P</b> | <b>1002.4891</b> | 501.7482        | 985.4625        | 493.2349         | <b>984.4785</b>  | 492.7429         | <b>8</b>  |
| 7  | 758.3138         | 379.6605        | 741.2872         | <b>371.1472</b>  | 740.3032        | 370.6552         | <b>S</b> | <b>905.4363</b>  | 453.2218        | 888.4098        | 444.7085         | 887.4258         | 444.2165         | <b>7</b>  |
| 8  | 887.3564         | 444.1818        | 870.3298         | 435.6685         | 869.3458        | 435.1765         | <b>E</b> | 818.4043         | 409.7058        | 801.3777        | 401.1925         | 800.3937         | 400.7005         | <b>6</b>  |
| 9  | 1016.3990        | 508.7031        | <b>999.3724</b>  | 500.1898         | <b>998.3884</b> | 499.6978         | <b>E</b> | <b>689.3617</b>  | 345.1845        | 672.3352        | 336.6712         | 671.3511         | 336.1792         | <b>5</b>  |
| 10 | 1202.4783        | 601.7428        | 1185.4517        | 593.2295         | 1184.4677       | 592.7375         | <b>W</b> | <b>560.3191</b>  | 280.6632        | 543.2926        | 272.1499         |                  |                  | <b>4</b>  |
| 11 | <b>1301.5467</b> | 651.2770        | <b>1284.5201</b> | 642.7637         | 1283.5361       | 642.2717         | <b>V</b> | <b>374.2398</b>  | 187.6235        | 357.2132        | 179.1103         |                  |                  | <b>3</b>  |
| 12 | 1429.6053        | 715.3063        | 1412.5787        | 706.7930         | 1411.5947       | 706.3010         | <b>Q</b> | <b>275.1714</b>  | 138.0893        | <b>258.1448</b> | 129.5761         |                  |                  | <b>2</b>  |
| 13 |                  |                 |                  |                  |                 |                  | <b>K</b> | <b>147.1128</b>  | 74.0600         | 130.0863        | 65.5468          |                  |                  | <b>1</b>  |

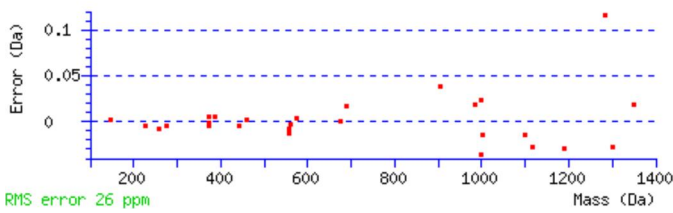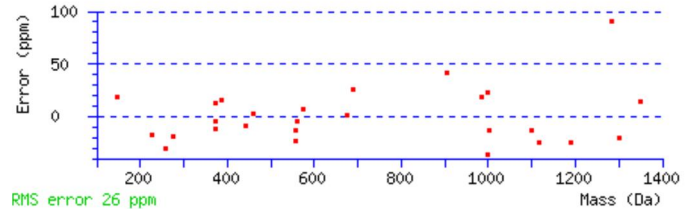

NCBI BLAST search of **QVCADPSEEWWQK**

(Parameters: blastp, nr protein database, expect=20000, no filter, PAM30)

Other BLAST [web gateways](#)

### All matches to this query

| Score | Mr(calc): | Delta  | Sequence             |
|-------|-----------|--------|----------------------|
| 65.9  | 1574.7035 | 0.0097 | <b>QVCADPSEEWWQK</b> |

|     |           |         |                                |
|-----|-----------|---------|--------------------------------|
| 4.8 | 1574.6527 | 0.0605  | <a href="#">NCIGQQFAMSEMK</a>  |
| 2.1 | 1574.7762 | -0.0630 | <a href="#">AFIQNSELMHEK</a>   |
| 1.0 | 1574.7311 | -0.0179 | <a href="#">EAEENDLSEEILGK</a> |

**Mascot:** <http://www.matrixscience.com/>



**Mascot Search Results**

**Peptide View**

MS/MS Fragmentation of **IAQSDYIPTQQDVLR**

Found in **P04899|GNAI2\_HUMAN**, Guanine nucleotide-binding protein G(i) subunit alpha-2 OS=Homo sapiens GN=GNAI2 PE=1 SV=3

Match to Query 26647: 1745.896308 from(873.955430,2+)

Title: Locus:9.1.1.5211.2

Click mouse within plot area to zoom in by factor of two about that point

Or,  100  1600

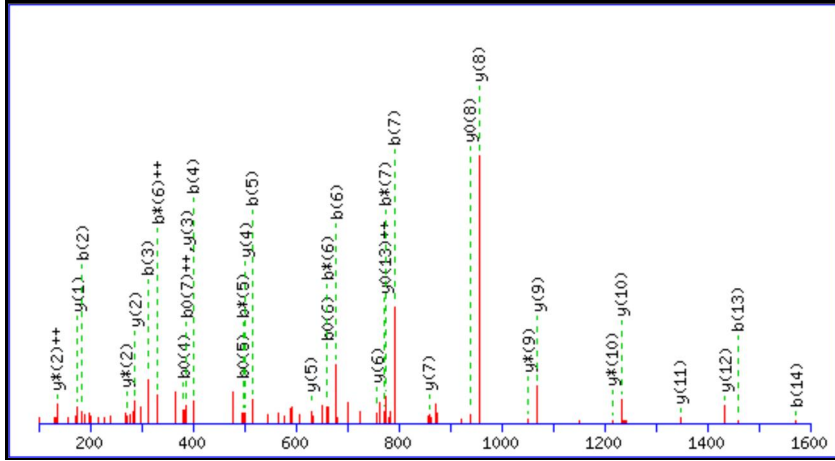

Monoisotopic mass of neutral peptide  $M_r(\text{calc})$ : 1745.8948

Fixed modifications: Carbamidomethyl (C)

Ions Score: 64 Expect: 1.1e-005

Matches (Bold Red): 34/152 fragment ions using 76 most intense peaks

| #  | b                | b <sup>++</sup> | b*              | b <sup>*++</sup> | b <sup>0</sup>  | b <sup>0++</sup> | Seq. | y                | y <sup>++</sup> | y*               | y <sup>*++</sup> | y <sup>0</sup>  | y <sup>0++</sup> | #  |
|----|------------------|-----------------|-----------------|------------------|-----------------|------------------|------|------------------|-----------------|------------------|------------------|-----------------|------------------|----|
| 1  | 114.0913         | 57.5493         |                 |                  |                 |                  | I    |                  |                 |                  |                  |                 |                  | 15 |
| 2  | <b>185.1285</b>  | 93.0679         |                 |                  |                 |                  | A    | 1633.8180        | 817.4127        | 1616.7915        | 808.8994         | 1615.8075       | 808.4074         | 14 |
| 3  | <b>313.1870</b>  | 157.0972        | 296.1605        | 148.5839         |                 |                  | Q    | 1562.7809        | 781.8941        | 1545.7544        | 773.3808         | 1544.7703       | <b>772.8888</b>  | 13 |
| 4  | <b>400.2191</b>  | 200.6132        | 383.1925        | 192.0999         | <b>382.2085</b> | 191.6079         | S    | <b>1434.7223</b> | 717.8648        | 1417.6958        | 709.3515         | 1416.7118       | 708.8595         | 12 |
| 5  | <b>515.2460</b>  | 258.1266        | <b>498.2195</b> | 249.6134         | <b>497.2354</b> | 249.1214         | D    | <b>1347.6903</b> | 674.3488        | 1330.6638        | 665.8355         | 1329.6797       | 665.3435         | 11 |
| 6  | <b>678.3093</b>  | 339.6583        | <b>661.2828</b> | <b>331.1450</b>  | <b>660.2988</b> | 330.6530         | Y    | <b>1232.6634</b> | 616.8353        | <b>1215.6368</b> | 608.3220         | 1214.6528       | 607.8300         | 10 |
| 7  | <b>791.3934</b>  | 396.2003        | <b>774.3668</b> | 387.6871         | 773.3828        | <b>387.1951</b>  | I    | <b>1069.6000</b> | 535.3037        | <b>1052.5735</b> | 526.7904         | 1051.5895       | 526.2984         | 9  |
| 8  | 888.4462         | 444.7267        | 871.4196        | 436.2134         | 870.4356        | 435.7214         | P    | <b>956.5160</b>  | 478.7616        | 939.4894         | 470.2483         | <b>938.5054</b> | 469.7563         | 8  |
| 9  | 989.4938         | 495.2506        | 972.4673        | 486.7373         | 971.4833        | 486.2453         | T    | <b>859.4632</b>  | 430.2352        | 842.4367         | 421.7220         | 841.4526        | 421.2300         | 7  |
| 10 | 1117.5524        | 559.2798        | 1100.5259       | 550.7666         | 1099.5419       | 550.2746         | Q    | <b>758.4155</b>  | 379.7114        | 741.3890         | 371.1981         | 740.4050        | 370.7061         | 6  |
| 11 | 1245.6110        | 623.3091        | 1228.5844       | 614.7959         | 1227.6004       | 614.3039         | Q    | <b>630.3570</b>  | 315.6821        | 613.3304         | 307.1688         | 612.3464        | 306.6768         | 5  |
| 12 | 1360.6379        | 680.8226        | 1343.6114       | 672.3093         | 1342.6274       | 671.8173         | D    | <b>502.2984</b>  | 251.6528        | 485.2718         | 243.1395         | 484.2878        | 242.6475         | 4  |
| 13 | <b>1459.7064</b> | 730.3568        | 1442.6798       | 721.8435         | 1441.6958       | 721.3515         | V    | <b>387.2714</b>  | 194.1394        | 370.2449         | 185.6261         |                 |                  | 3  |
| 14 | <b>1572.7904</b> | 786.8988        | 1555.7639       | 778.3856         | 1554.7799       | 777.8936         | L    | <b>288.2030</b>  | 144.6051        | <b>271.1765</b>  | <b>136.0919</b>  |                 |                  | 2  |
| 15 |                  |                 |                 |                  |                 |                  | R    | <b>175.1190</b>  | 88.0631         | 158.0924         | 79.5498          |                 |                  | 1  |

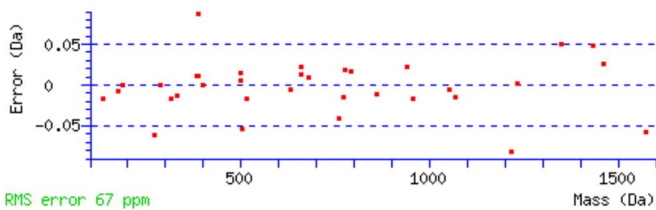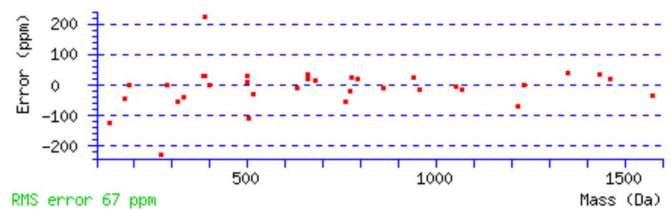

NCBI BLAST search of **IAQSDYIPTQQDVLR**

(Parameters: blastp, nr protein database, expect=20000, no filter, PAM30)

Other BLAST [web gateways](#)

All matches to this query

| Score | Mr(calc): | Delta   | Sequence                          |
|-------|-----------|---------|-----------------------------------|
| 63.6  | 1745.8948 | 0.0015  | <a href="#">IAQSDYIPTQQDVLR</a>   |
| 7.8   | 1745.9723 | -0.0760 | <a href="#">VHALEQAPILCRALR</a>   |
| 6.3   | 1745.9611 | -0.0648 | <a href="#">LTVHKVIHTGEKPK</a>    |
| 3.6   | 1745.9199 | -0.0236 | <a href="#">AQAEDYALVSAVATLPK</a> |
| 2.7   | 1745.8982 | -0.0019 | <a href="#">CKLLDVTGGLGTDEL</a>   |
| 2.2   | 1745.8923 | 0.0040  | <a href="#">LLFRFYDISSGCIR</a>    |
| 2.0   | 1745.8544 | 0.0419  | <a href="#">DERNQSIIVSGESGAGK</a> |
| 0.8   | 1745.8981 | -0.0018 | <a href="#">GQKLESMQLELDSLR</a>   |

Mascot: <http://www.matrixscience.com/>

# Mascot Search Results

## Peptide View

MS/MS Fragmentation of **LADGGATNQGR**

Found in **Q08380|LG3BP\_HUMAN**, Galectin-3-binding protein OS=Homo sapiens GN=LGALS3BP PE=1 SV=1

Match to Query 19548: 1058.521068 from(530.267810,2+)

Title: Locus:5.1.1.4612.2

Click mouse within plot area to zoom in by factor of two about that point

Or,   to  Da

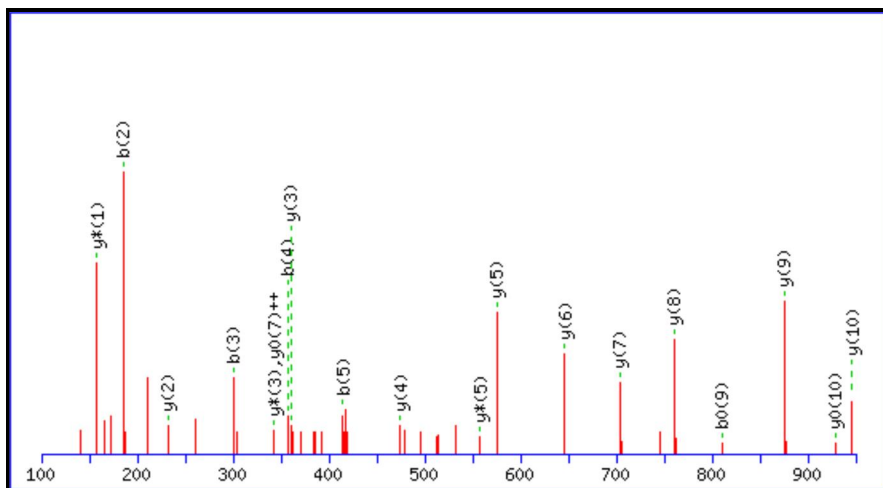

Monoisotopic mass of neutral peptide **Mr(calc): 1058.5105**

Fixed modifications: Carbamidomethyl (C)

Ions Score: 60 Expect: 3.2e-005

Matches (**Bold Red**): 19/94 fragment ions using 38 most intense peaks

| #  | b               | b <sup>++</sup> | b*       | b <sup>*++</sup> | b <sup>0</sup>  | b <sup>0++</sup> | Seq. | y               | y <sup>++</sup> | y*              | y <sup>*++</sup> | y <sup>0</sup>  | y <sup>0++</sup> | #  |
|----|-----------------|-----------------|----------|------------------|-----------------|------------------|------|-----------------|-----------------|-----------------|------------------|-----------------|------------------|----|
| 1  | 114.0913        | 57.5493         |          |                  |                 |                  | L    |                 |                 |                 |                  |                 |                  | 11 |
| 2  | <b>185.1285</b> | 93.0679         |          |                  |                 |                  | A    | <b>946.4337</b> | 473.7205        | 929.4072        | 465.2072         | <b>928.4231</b> | 464.7152         | 10 |
| 3  | <b>300.1554</b> | 150.5813        |          |                  | 282.1448        | 141.5761         | D    | <b>875.3966</b> | 438.2019        | 858.3700        | 429.6887         | 857.3860        | 429.1966         | 9  |
| 4  | <b>357.1769</b> | 179.0921        |          |                  | 339.1663        | 170.0868         | G    | <b>760.3696</b> | 380.6885        | 743.3431        | 372.1752         | 742.3591        | 371.6832         | 8  |
| 5  | <b>414.1983</b> | 207.6028        |          |                  | 396.1878        | 198.5975         | G    | <b>703.3482</b> | 352.1777        | 686.3216        | 343.6645         | 685.3376        | <b>343.1724</b>  | 7  |
| 6  | 485.2354        | 243.1214        |          |                  | 467.2249        | 234.1161         | A    | <b>646.3267</b> | 323.6670        | 629.3002        | 315.1537         | 628.3161        | 314.6617         | 6  |
| 7  | 586.2831        | 293.6452        |          |                  | 568.2726        | 284.6399         | T    | <b>575.2896</b> | 288.1484        | <b>558.2631</b> | 279.6352         | 557.2790        | 279.1432         | 5  |
| 8  | 700.3260        | 350.6667        | 683.2995 | 342.1534         | 682.3155        | 341.6614         | N    | <b>474.2419</b> | 237.6246        | 457.2154        | 229.1113         |                 |                  | 4  |
| 9  | 828.3846        | 414.6959        | 811.3581 | 406.1827         | <b>810.3741</b> | 405.6907         | Q    | <b>360.1990</b> | 180.6031        | <b>343.1724</b> | 172.0899         |                 |                  | 3  |
| 10 | 885.4061        | 443.2067        | 868.3795 | 434.6934         | 867.3955        | 434.2014         | G    | <b>232.1404</b> | 116.5738        | 215.1139        | 108.0606         |                 |                  | 2  |
| 11 |                 |                 |          |                  |                 |                  | R    | 175.1190        | 88.0631         | <b>158.0924</b> | 79.5498          |                 |                  | 1  |

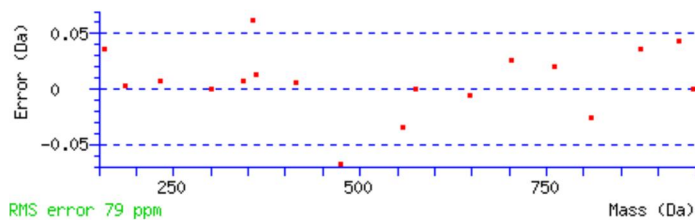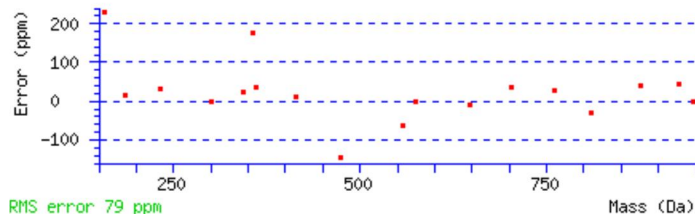

NCBI **BLAST** search of [LADGGATNQGR](#)

(Parameters: blastp, nr protein database, expect=20000, no filter, PAM30)

Other BLAST [web gateways](#)

**All matches to this query**

| Score | Mr(calc): | Delta   | Sequence                    |
|-------|-----------|---------|-----------------------------|
| 60.3  | 1058.5105 | 0.0106  | <a href="#">LADGGATNQGR</a> |
| 12.9  | 1058.5244 | -0.0033 | <a href="#">LAEEQEVNK</a>   |
| 4.3   | 1058.5066 | 0.0144  | <a href="#">GELGMSPPGSK</a> |
| 3.8   | 1058.5356 | -0.0146 | <a href="#">VISGGGEGEVR</a> |
| 2.8   | 1058.5244 | -0.0033 | <a href="#">ALEEDLNQK</a>   |
| 0.1   | 1058.5356 | -0.0145 | <a href="#">IALQEDTNR</a>   |
| 0.1   | 1058.5179 | 0.0032  | <a href="#">IASDCQLPR</a>   |
| 0.1   | 1058.5655 | -0.0444 | <a href="#">LAKNGICQR</a>   |
| 0.1   | 1058.5066 | 0.0144  | <a href="#">LANEPDLCK</a>   |
| 0.1   | 1058.5291 | -0.0080 | <a href="#">LAQQVANC</a>    |

**Mascot:** <http://www.matrixscience.com/>

# MASCOT SCIENCE Mascot Search Results

## Peptide View

MS/MS Fragmentation of **GCGTVLLSGPR**

Found in **Q07020|RL18\_HUMAN**, 60S ribosomal protein L18 OS=Homo sapiens GN=RPL18 PE=1 SV=2

Match to Query 20902: 1115.578648 from(558.796600,2+)

Title: Locus:13.1.1.5200.3

Click mouse within plot area to zoom in by factor of two about that point

Or,   to  Da

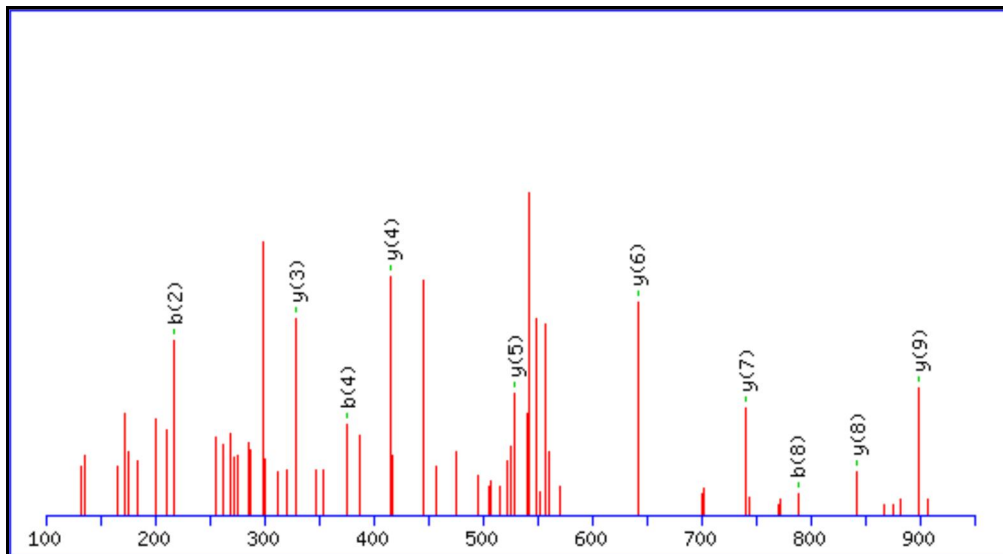

**Monoisotopic mass of neutral peptide Mr(calc):** 1115.5757

**Fixed modifications:** Carbamidomethyl (C)

**Ions Score:** 54 **Expect:** 0.00014

**Matches (Bold Red):** 10/88 fragment ions using 16 most intense peaks

| #  | b               | b <sup>++</sup> | b <sup>0</sup> | b <sup>0++</sup> | Seq.     | y               | y <sup>++</sup> | y <sup>*</sup> | y <sup>*++</sup> | y <sup>0</sup> | y <sup>0++</sup> | #         |
|----|-----------------|-----------------|----------------|------------------|----------|-----------------|-----------------|----------------|------------------|----------------|------------------|-----------|
| 1  | 58.0287         | 29.5180         |                |                  | <b>G</b> |                 |                 |                |                  |                |                  | <b>11</b> |
| 2  | <b>218.0594</b> | 109.5333        |                |                  | <b>C</b> | 1059.5615       | 530.2844        | 1042.5350      | 521.7711         | 1041.5510      | 521.2791         | <b>10</b> |
| 3  | 275.0809        | 138.0441        |                |                  | <b>G</b> | <b>899.5309</b> | 450.2691        | 882.5043       | 441.7558         | 881.5203       | 441.2638         | <b>9</b>  |
| 4  | <b>376.1285</b> | 188.5679        | 358.1180       | 179.5626         | <b>T</b> | <b>842.5094</b> | 421.7584        | 825.4829       | 413.2451         | 824.4989       | 412.7531         | <b>8</b>  |
| 5  | 475.1969        | 238.1021        | 457.1864       | 229.0968         | <b>V</b> | <b>741.4618</b> | 371.2345        | 724.4352       | 362.7212         | 723.4512       | 362.2292         | <b>7</b>  |
| 6  | 588.2810        | 294.6441        | 570.2704       | 285.6389         | <b>L</b> | <b>642.3933</b> | 321.7003        | 625.3668       | 313.1870         | 624.3828       | 312.6950         | <b>6</b>  |
| 7  | 701.3651        | 351.1862        | 683.3545       | 342.1809         | <b>L</b> | <b>529.3093</b> | 265.1583        | 512.2827       | 256.6450         | 511.2987       | 256.1530         | <b>5</b>  |
| 8  | <b>788.3971</b> | 394.7022        | 770.3865       | 385.6969         | <b>S</b> | <b>416.2252</b> | 208.6162        | 399.1987       | 200.1030         | 398.2146       | 199.6110         | <b>4</b>  |
| 9  | 845.4186        | 423.2129        | 827.4080       | 414.2076         | <b>G</b> | <b>329.1932</b> | 165.1002        | 312.1666       | 156.5870         |                |                  | <b>3</b>  |
| 10 | 942.4713        | 471.7393        | 924.4608       | 462.7340         | <b>P</b> | 272.1717        | 136.5895        | 255.1452       | 128.0762         |                |                  | <b>2</b>  |
| 11 |                 |                 |                |                  | <b>R</b> | 175.1190        | 88.0631         | 158.0924       | 79.5498          |                |                  | <b>1</b>  |

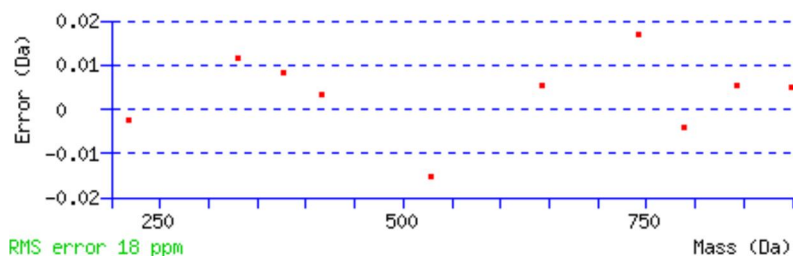

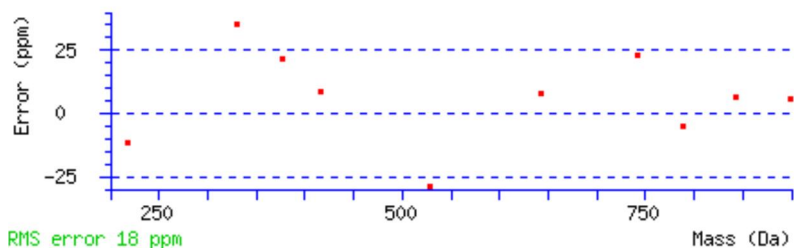

NCBI **BLAST** search of [GCGTVLLSGPR](#)

(Parameters: blastp, nr protein database, expect=20000, no filter, PAM30)

Other BLAST [web gateways](#)

**All matches to this query**

| Score | Mr(calc): | Delta   | Sequence                    |
|-------|-----------|---------|-----------------------------|
| 54.5  | 1115.5757 | 0.0029  | <a href="#">GCGTVLLSGPR</a> |
| 17.7  | 1115.6186 | -0.0400 | <a href="#">SLQSLGPK</a>    |
| 9.5   | 1115.5571 | 0.0216  | <a href="#">GDVGLVAENSR</a> |
| 6.5   | 1115.6186 | -0.0400 | <a href="#">NITEGLLTQK</a>  |
| 2.8   | 1115.5935 | -0.0148 | <a href="#">QEASIQALTR</a>  |
| 2.6   | 1115.5935 | -0.0148 | <a href="#">GVATSLGLNER</a> |
| 2.2   | 1115.6121 | -0.0334 | <a href="#">KAECLVALGR</a>  |
| 2.1   | 1115.5935 | -0.0148 | <a href="#">SLQDSQLVAR</a>  |
| 1.2   | 1115.6299 | -0.0512 | <a href="#">GSASIIIRGDK</a> |

Mascot: <http://www.matrixscience.com/>

# MASCOT SCIENCE Mascot Search Results

## Peptide View

MS/MS Fragmentation of **AVFGELPSGGGTVEK**

Found in **Q96C23|GALM\_HUMAN**, Aldose 1-epimerase OS=Homo sapiens GN=GALM PE=1 SV=1

Match to Query 25283: 1446.732748 from(724.373650,2+)

Title: Locus:9.1.1.5175.3

Click mouse within plot area to zoom in by factor of two about that point

Or,  100 to  Da

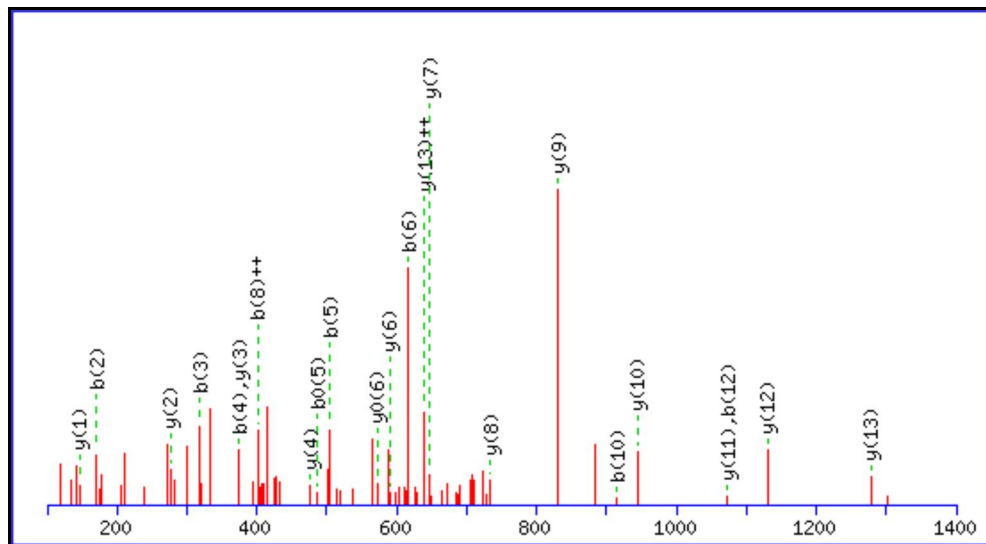

Monoisotopic mass of neutral peptide  $M_r(\text{calc})$ : 1446.7355

Fixed modifications: Carbamidomethyl (C)

Ions Score: 54 Expect: 0.00014

Matches (Bold Red): 23/130 fragment ions using 68 most intense peaks

| #  | b                | b <sup>++</sup> | b <sup>0</sup>  | b <sup>0++</sup> | Seq.     | y                | y <sup>++</sup> | y*        | y <sup>*++</sup> | y <sup>0</sup>  | y <sup>0++</sup> | #         |
|----|------------------|-----------------|-----------------|------------------|----------|------------------|-----------------|-----------|------------------|-----------------|------------------|-----------|
| 1  | 72.0444          | 36.5258         |                 |                  | <b>A</b> |                  |                 |           |                  |                 |                  | <b>15</b> |
| 2  | <b>171.1128</b>  | 86.0600         |                 |                  | <b>V</b> | 1376.7056        | 688.8564        | 1359.6791 | 680.3432         | 1358.6951       | 679.8512         | <b>14</b> |
| 3  | <b>318.1812</b>  | 159.5942        |                 |                  | <b>F</b> | <b>1277.6372</b> | <b>639.3222</b> | 1260.6107 | 630.8090         | 1259.6266       | 630.3170         | <b>13</b> |
| 4  | <b>375.2027</b>  | 188.1050        |                 |                  | <b>G</b> | <b>1130.5688</b> | 565.7880        | 1113.5422 | 557.2748         | 1112.5582       | 556.7828         | <b>12</b> |
| 5  | <b>504.2453</b>  | 252.6263        | <b>486.2347</b> | 243.6210         | <b>E</b> | <b>1073.5473</b> | 537.2773        | 1056.5208 | 528.7640         | 1055.5368       | 528.2720         | <b>11</b> |
| 6  | <b>617.3293</b>  | 309.1683        | 599.3188        | 300.1630         | <b>L</b> | <b>944.5047</b>  | 472.7560        | 927.4782  | 464.2427         | 926.4942        | 463.7507         | <b>10</b> |
| 7  | 714.3821         | 357.6947        | 696.3715        | 348.6894         | <b>P</b> | <b>831.4207</b>  | 416.2140        | 814.3941  | 407.7007         | 813.4101        | 407.2087         | <b>9</b>  |
| 8  | 801.4141         | <b>401.2107</b> | 783.4036        | 392.2054         | <b>S</b> | <b>734.3679</b>  | 367.6876        | 717.3414  | 359.1743         | 716.3573        | 358.6823         | <b>8</b>  |
| 9  | 858.4356         | 429.7214        | 840.4250        | 420.7162         | <b>G</b> | <b>647.3359</b>  | 324.1716        | 630.3093  | 315.6583         | 629.3253        | 315.1663         | <b>7</b>  |
| 10 | <b>915.4571</b>  | 458.2322        | 897.4465        | 449.2269         | <b>G</b> | <b>590.3144</b>  | 295.6608        | 573.2879  | 287.1476         | <b>572.3039</b> | 286.6556         | <b>6</b>  |
| 11 | 972.4785         | 486.7429        | 954.4680        | 477.7376         | <b>G</b> | 533.2930         | 267.1501        | 516.2664  | 258.6368         | 515.2824        | 258.1448         | <b>5</b>  |
| 12 | <b>1073.5262</b> | 537.2667        | 1055.5156       | 528.2615         | <b>T</b> | <b>476.2715</b>  | 238.6394        | 459.2449  | 230.1261         | 458.2609        | 229.6341         | <b>4</b>  |
| 13 | 1172.5946        | 586.8009        | 1154.5841       | 577.7957         | <b>V</b> | <b>375.2238</b>  | 188.1155        | 358.1973  | 179.6023         | 357.2132        | 179.1103         | <b>3</b>  |
| 14 | 1301.6372        | 651.3222        | 1283.6266       | 642.3170         | <b>E</b> | <b>276.1554</b>  | 138.5813        | 259.1288  | 130.0681         | 258.1448        | 129.5761         | <b>2</b>  |
| 15 |                  |                 |                 |                  | <b>K</b> | <b>147.1128</b>  | 74.0600         | 130.0863  | 65.5468          |                 |                  | <b>1</b>  |

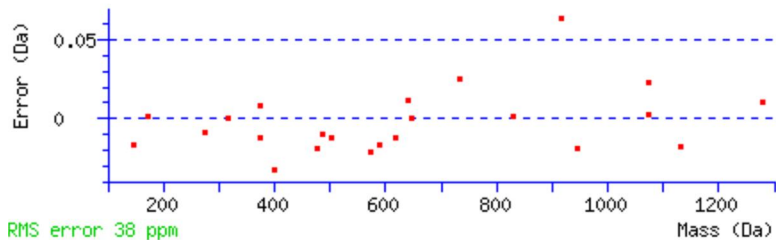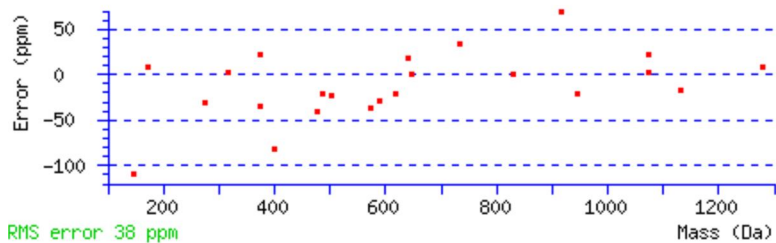

NCBI **BLAST** search of [AVFGELPSGGGTVEK](#)

(Parameters: blastp, nr protein database, expect=20000, no filter, PAM30)

Other BLAST [web gateways](#)

**All matches to this query**

| Score | Mr(calc): | Delta   | Sequence                        |
|-------|-----------|---------|---------------------------------|
| 53.6  | 1446.7355 | -0.0027 | <a href="#">AVFGELPSGGGTVEK</a> |
| 7.1   | 1446.7476 | -0.0148 | <a href="#">AVFHMQSVKCLK</a>    |
| 5.3   | 1446.7983 | -0.0656 | <a href="#">GLFPRELVGAFK</a>    |
| 5.1   | 1446.7276 | 0.0051  | <a href="#">GMITVTDPDLIEK</a>   |
| 3.5   | 1446.7314 | 0.0013  | <a href="#">KTTEENQELVTR</a>    |
| 2.1   | 1446.8017 | -0.0689 | <a href="#">MKIDIHSHILPK</a>    |
| 1.6   | 1446.6674 | 0.0654  | <a href="#">AADMDLEWRQGR</a>    |
| 1.6   | 1446.7653 | -0.0325 | <a href="#">RYLAIHGMETLK</a>    |
| 0.6   | 1446.7579 | -0.0252 | <a href="#">AVDFLAANESRVR</a>   |
| 0.6   | 1446.7388 | -0.0061 | <a href="#">MGVATTLQPPTTSK</a>  |

**Mascot:** <http://www.matrixscience.com/>



**MASCOT SCIENCE** Mascot Search Results

**Peptide View**

MS/MS Fragmentation of **EAAENSLVAYK**

Found in **P62258|1433E\_HUMAN**, 14-3-3 protein epsilon OS=Homo sapiens GN=YWHAE PE=1 SV=1

Match to Query 244: 1193.587028 from(597.800790,2+)

Title: Locus:1.1.1.4405.2

Click mouse within plot area to zoom in by factor of two about that point

Or, Plot from  to  Da

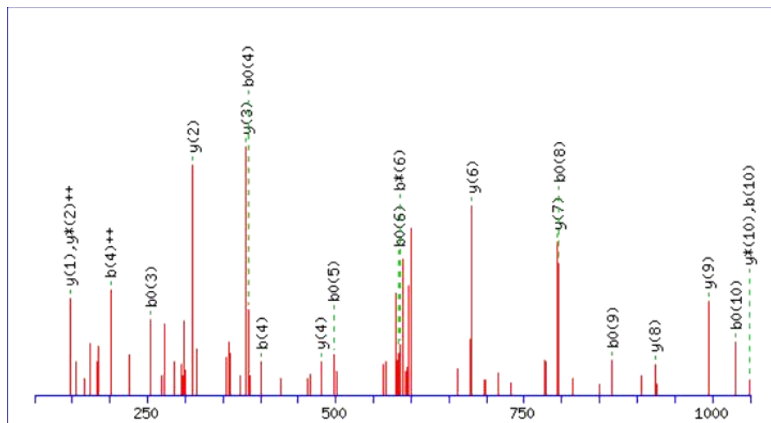

Monoisotopic mass of neutral peptide Mr(calc): 1193.5928

Fixed modifications: Carbamidomethyl (C)

Ions Score: 80 Expect: 4.6e-007

Matches (Bold Red): 22/102 fragment ions using 23 most intense peaks

| #  | b                | b <sup>++</sup> | b*              | b <sup>+++</sup> | b <sup>0</sup>   | b <sup>0++</sup> | Seq. | y               | y <sup>++</sup> | y*               | y <sup>+++</sup> | y <sup>0</sup> | y <sup>0++</sup> | #  |
|----|------------------|-----------------|-----------------|------------------|------------------|------------------|------|-----------------|-----------------|------------------|------------------|----------------|------------------|----|
| 1  | 130.0499         | 65.5286         |                 |                  | 112.0393         | 56.5233          | E    |                 |                 |                  |                  |                |                  | 11 |
| 2  | <b>201.0870</b>  | 101.0471        |                 |                  | 183.0764         | 92.0418          | A    | 1065.5575       | 533.2824        | <b>1048.5310</b> | 524.7691         | 1047.5469      | 524.2771         | 10 |
| 3  | 272.1241         | 136.5657        |                 |                  | <b>254.1135</b>  | 127.5604         | A    | <b>994.5204</b> | 497.7638        | 977.4938         | 489.2506         | 976.5098       | 488.7585         | 9  |
| 4  | <b>401.1667</b>  | <b>201.0870</b> |                 |                  | <b>383.1561</b>  | 192.0817         | E    | <b>923.4833</b> | 462.2453        | 906.4567         | 453.7320         | 905.4727       | 453.2400         | 8  |
| 5  | 515.2096         | 258.1084        | 498.1831        | 249.5952         | <b>497.1991</b>  | 249.1032         | N    | <b>794.4407</b> | 397.7240        | 777.4141         | 389.2107         | 776.4301       | 388.7187         | 7  |
| 6  | 602.2416         | 301.6245        | <b>585.2151</b> | 293.1112         | <b>584.2311</b>  | 292.6192         | S    | <b>680.3978</b> | 340.7025        | 663.3712         | 332.1892         | 662.3872       | 331.6972         | 6  |
| 7  | 715.3257         | 358.1665        | 698.2992        | 349.6532         | 697.3151         | 349.1612         | L    | 593.3657        | 297.1865        | 576.3392         | 288.6732         |                |                  | 5  |
| 8  | 814.3941         | 407.7007        | 797.3676        | 399.1874         | <b>796.3836</b>  | 398.6954         | V    | <b>480.2817</b> | 240.6445        | 463.2551         | 232.1312         |                |                  | 4  |
| 9  | 885.4312         | 443.2193        | 868.4047        | 434.7060         | <b>867.4207</b>  | 434.2140         | A    | <b>381.2132</b> | 191.1103        | 364.1867         | 182.5970         |                |                  | 3  |
| 10 | <b>1048.4946</b> | 524.7509        | 1031.4680       | 516.2376         | <b>1030.4840</b> | 515.7456         | Y    | <b>310.1761</b> | 155.5917        | 293.1496         | <b>147.0784</b>  |                |                  | 2  |
| 11 |                  |                 |                 |                  |                  |                  | K    | <b>147.1128</b> | 74.0600         | 130.0863         | 65.5468          |                |                  | 1  |

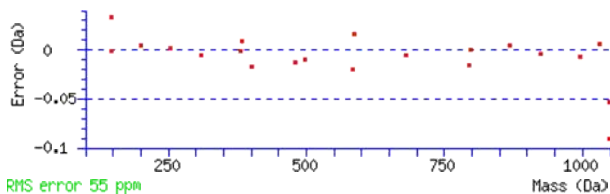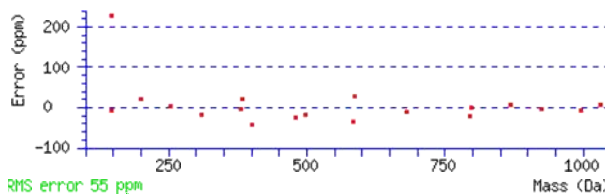

NCBI BLAST search of [EAAENSLVAYK](#)

(Parameters: blastp, nr protein database, expect=20000, no filter, PAM30)

Other BLAST [web gateways](#)

**All matches to this query**

| Score | Mr(calc): | Delta   | Sequence                    |
|-------|-----------|---------|-----------------------------|
| 80.3  | 1193.5928 | -0.0057 | <a href="#">EAAENSLVAYK</a> |
| 6.9   | 1193.5598 | 0.0273  | <a href="#">AEEEGVKMSAK</a> |
| 6.1   | 1193.6148 | -0.0278 | <a href="#">TVLSKMMGSPK</a> |
| 6.1   | 1193.6148 | -0.0278 | <a href="#">TVLSKMMGSPK</a> |
| 5.2   | 1193.5573 | 0.0297  | <a href="#">ATLPPFMCNK</a>  |

|     |           |         |                             |
|-----|-----------|---------|-----------------------------|
| 4.6 | 1193.5598 | 0.0272  | <a href="#">DGDKDVMITGK</a> |
| 3.6 | 1193.6993 | -0.1122 | <a href="#">SLARHLTQLR</a>  |
| 3.5 | 1193.7244 | -0.1374 | <a href="#">TVQTIVHRLK</a>  |
| 3.0 | 1193.5135 | 0.0735  | <a href="#">HPDMDEAVHK</a>  |
| 2.5 | 1193.6404 | -0.0534 | <a href="#">NLVEELQPR</a>   |

Mascot: <http://www.matrixscience.com/>
